# Supplementary material for: Dynamic Changes in Non-Volatile Components during Steamed Green Tea Manufacturing Based on Widely Targeted Metabolomic Analysis
Source: Foods. 2023 Apr 6;12(7):1551. doi: 10.3390/foods12071551 (PMC10094149; doi:10.3390/foods12071551)
Supplement: Supplementary file 1 [file foods-12-01551-s001.zip › Supplementary Materials-Table S1.xlsx]

## Sheet: Sheet1
Table S1: List of 745 identified non-volatile compounds and their contents during the processing of steamed green tea
NO.	Q1 (Da)	Q3 (Da)	Molecular weight (Da)	Formula	Ionization model	Compounds	Classifications	CAS	FTL	STL	RTL	SPTL	DTL	QC	P-values
1	147.113	84.0808	146.106	C6H14N2O2	[M+H]+	L-Lysine	Amino acids and their derivatives	56-87-1	29261209±2238140	28439498±2950037	25562080±327662	18460377±7275297	21575117±1974916	26270433±222114	0.016
2	175.108	84.0444	174.1	C7H14N2O3	[M+H]+	L-Theanine	Amino acids and their derivatives	3081-61-6	4245683±122435	4426584±612027	4358421±635268	4574428±533268	4549971±279819	4482255±110118	0.809
3	148.06	84.0444	147.053	C5H9NO4	[M+H]+	L-Glutamic acid	Amino acids and their derivatives	56-86-0	39459913±60881	45110633±3103603	52068059±3572345	61708029±1928694	58601852±4552245	53364079±1437852	0.014
4	189.135	144.102	188.127	C7H16N4O2	[M+H]+	Homoarginine	Amino acids and their derivatives	156-86-5	994221±65331	1563200±110957	1224829±28794	1297593±64334	1235557±56919	1274089±23297	0.019
5	130.086	70.0667	129.079	C6H11NO2	[M+H]+	Homoproline	Amino acids and their derivatives	56879-46-0	105517775±29911399	63294025±9191621	64332600±6932361	32352466±2311133	43451853±4272487	56895653±1809493	0.012
6	156.077	110.071	155.07	C6H9N3O2	[M+H]+	L-Histidine	Amino acids and their derivatives	71-00-1	4827594±206234	6649715±381626	6111724±817132	5985118±771022	4908961±332170	6361403±204056	0.028
7	147.076	84.0444	146.069	C5H10N2O3	[M+H]+	L-Glutamine	Amino acids and their derivatives	56-85-9	26298755±1069936	25372785±1085424	22390163±1361654	18136988±1567679	17249233±2745774	23679123±770063	0.015
8	166.086	120.081	165.079	C9H11NO2	[M+H]+	L-Phenylalanine	Amino acids and their derivatives	63-91-2	9135035±326733	13290617±220759	11427295±582188	11694952±530958	13935489±354260	11041487±435249	0.011
9	203.083	116.051	204.09	C11H12N2O2	[M-H]-	L-Tryptophan	Amino acids and their derivatives	73-22-3	12885134±1099932	19155624±1200712	18063498±893028	16887246±1273190	18109532±263774	20168031±999310	0.043
10	120.066	74.0601	119.058	C4H9NO3	[M+H]+	L-Threonine*	Amino acids and their derivatives	72-19-5	3181660±132144	3011155±103851	3015241±259932	2967215±165107	3147300±195756	3265335±205729	0.415
11	130.05	84.0454	129.043	C5H7NO3	[M+H]+	Pyroglutamic acid	Amino acids and their derivatives	4042-36-8	7023423±285670	7473277±1223571	7373243±1105117	7603806±910288	8051367±254769	5985463±400155	0.651
12	120.066	74.0601	119.058	C4H9NO3	[M+H]+	L-Homoserine*	Amino acids and their derivatives	672-15-1	3206136±55294	3122006±163205	2936535±190310	2908078±258734	3105409±101760	3252579±227705	0.335
13	132.102	86.0964	131.095	C6H13NO2	[M+H]+	L-Isoleucine*	Amino acids and their derivatives	73-32-5	3244655±207609	3346109±174821	2668272±304526	2265769±74239	2360292±200309	2600829±214345	0.025
14	164.074	56.0495	163.067	C6H13NO2S	[M+H]+	L-Homomethionine	Amino acids and their derivatives	25148-30-5	723378±81161	1648937±179882	4939492±248292	1158919±85073	934293±38479	1043715±87210	0.009
15	132.102	86.0964	131.095	C6H13NO2	[M+H]+	L-Leucine*	Amino acids and their derivatives	61-90-5	3229579±139338	3263761±102548	2609916±285192	2195454±104458	2351222±126616	2510557±210754	0.02
16	132.102	86.0964	131.095	C6H13NO2	[M+H]+	L-Norleucine*	Amino acids and their derivatives	327-57-1	3197783±142314	3334223±73690	2658739±328528	2166411±122873	2338924±157966	2581437±206536	0.018
17	175.115	70.064	174.112	C6H14N4O2	[M+H]+	L-Arginine	Amino acids and their derivatives	74-79-3	11070032±1813613	15802491±3454229	9854515±1924493	14372444±1797460	11841142±2468799	11932203±1107067	0.082
18	116.071	70.0651	115.063	C5H9NO2	[M+H]+	L-Proline	Amino acids and their derivatives	147-85-3	20651313±2868547	16868375±2631873	13533204±2829449	15271779±3701920	16985526±1704282	18175830±1915494	0.124
19	144.098	98.09	143.095	C7H13NO2	[M+H]+	L-Cyclopentylglycine	Amino acids and their derivatives	2521-84-8	532718±45551	395304±36122	690658±165799	720065±174922	669255±85485	533683±93734	0.054
20	106.05	70.0287	105.043	C3H7NO3	[M+H]+	L-Serine	Amino acids and their derivatives	56-45-1	32262±4298	42632±7459	27758±6207	41147±7864	33627±6495	35922±6497	0.134
21	182.081	136.076	181.074	C9H11NO3	[M+H]+	L-Tyrosine	Amino acids and their derivatives	60-18-4	26527225±2844937	21488034±1257938	14726185±3452034	15498757±1100511	17792916±1970838	17148360±3275628	0.022
22	132.03	88.0404	133.037	C4H7NO4	[M-H]-	L-Aspartic Acid*	Amino acids and their derivatives	56-84-8	4718402±581653	6423647±848221	6964670±647892	8108962±1574002	7272244±1477448	8691999±977720	0.078
23	133.097	116.071	132.09	C5H12N2O2	[M+H]+	L-Ornithine	Amino acids and their derivatives	70-26-8	107392±12044	134735±8524	149853±2080	122162±37216	105508±12127	129077±7477	0.088
24	189.16	84.0803	188.153	C9H20N2O2	[M+H]+	Trimethyllysine	Amino acids and their derivatives	23284-33-5	655220±24790	982526±137150	882267±108698	741003±47889	675847±112563	710901±37737	0.03
25	189.134	70.0652	188.127	C7H16N4O2	[M+H]+	N-Monomethyl-L-arginine	Amino acids and their derivatives	17035-90-4	5628579±269922	8396417±152819	6733788±151208	7278858±198701	6090136±294421	6637646±93140	0.009
26	104.071	58.0659	103.063	C4H9NO2	[M+H]+	N-Ethylglycine	Amino acids and their derivatives	627-01-0	12469255±216962	5588070±316410	5458289±453948	6685406±328800	5824074±162966	7183679±139379	0.024
27	104.071	58.0651	103.063	C4H9NO2	[M+H]+	N,N-Dimethylglycine*	Amino acids and their derivatives	1118-68-9	12712587±720771	6457868±406325	5785781±232187	6633008±200163	6369267±422926	7538860±166808	0.035
28	203.15	70.0653	202.143	C8H18N4O2	[M+H]+	N,N'-Dimethylarginine;SDMA*	Amino acids and their derivatives	30344-00-4	1036271±42271	1393412±90012	1222309±82565	1283940±109828	1333505±64381	1215057±28468	0.063
29	104.071	59.0145	103.063	C4H9NO2	[M+H]+	Methyl 3-aminopropanoate	Amino acids and their derivatives	4138-35-6	13317623±400552	6459332±591372	5762522±480256	6780426±505430	6393051±495290	7770685±182943	0.042
30	148.06	88.0393	147.053	C5H9NO4	[M+H]+	O-Acetylserine	Amino acids and their derivatives	5147-00-2	360969±36753	303697±11359	338665±6908	273618±35753	329357±67588	341466±9144	0.102
31	229.155	70.0651	228.147	C11H20N2O3	[M+H]+	L-Prolyl-L-Leucine	Amino acids and their derivatives	52899-07-7	798033±33921	720778±55811	482280±265664	410685±252339	532233±48549	629860±18104	0.034
32	227.103	116.072	226.095	C10H14N2O4	[M+H]+	Cyclo(Pro-Glu)	Amino acids and their derivatives	-	177442±1269	263595±20369	208573±17448	217977±6817	187408±13127	191228±5540	0.019
33	146.047	102.056	147.053	C5H9NO4	[M-H]-	L-threo-3-Methylaspartate	Amino acids and their derivatives	6061-13-8	907176±46055	1173565±39947	1362530±18024	1649512±50790	1777640±51468	1661171±51616	0.009
34	173.105	131.083	174.1	C7H14N2O3	[M-H]-	N-α-Acetyl-L-ornithine	Amino acids and their derivatives	6205-08-9	3586769±313147	5413492±256647	4424424±79889	4846251±168369	4309926±128159	5006486±177533	0.011
35	223.108	120.082	222.1	C11H14N2O3	[M+H]+	Glycylphenylalanine*	Amino acids and their derivatives	3321-03-7	408479±54180	863313±73049	690403±82656	539589±33286	492292±67601	532025±22734	0.106
36	174.041	88.0404	175.048	C6H9NO5	[M-H]-	N-Acetyl-L-Aspartic Acid	Amino acids and their derivatives	997-55-7	93826±9535	124406±7730	125081±16912	139014±24016	130031±8015	131000±5966	0.102
37	129.065	56.0494	128.059	C5H8N2O2	[M+H]+	Cyclo(Ala-Gly)	Amino acids and their derivatives	4526-77-6	4647992±722211	3940461±186013	4192925±1439437	4450686±1354701	4211140±262760	3839865±183456	0.754
38	295.129	120.082	294.122	C14H18N2O5	[M+H]+	Glu-Phe	Amino acids and their derivatives	20556-22-3	7291543±356259	4960240±422519	5439193±542784	3652560±92850	4334038±433064	5813501±278297	0.013
39	261.145	86.0968	260.137	C11H20N2O5	[M+H]+	L-γ-Glutamyl-L-leucine	Amino acids and their derivatives	2566-39-4	567765±11880	609717±19251	576075±43786	495983±26395	389850±63340	511119±24850	0.017
40	237.123	120.088	236.116	C12H16N2O3	[M+H]+	L-Alanyl-L-Phenylalanine	Amino acids and their derivatives	3061-90-3	44573±12958	139353±8997	135210±24818	127056±17610	123544±6103	113879±6258	0.075
41	219.135	60.04	218.127	C9H18N2O4	[M+H]+	L-Seryl-L-Isoleucine	Amino acids and their derivatives	91086-51-0	77451±6935	207280±11687	213334±12276	193455±20118	184448±7682	172812±9592	0.037
42	223.108	120.088	222.1	C11H14N2O3	[M+H]+	L-Glycyl-L-phenylalanine*	Amino acids and their derivatives	721-66-4	412791±10295	794712±30468	662256±69133	569430±20445	443862±46611	537453±30847	0.011
43	247.129	184.097	246.122	C10H18N2O5	[M+H]+	γ-Glutamyl-L-valine	Amino acids and their derivatives	-	433479±10680	432997±34892	455577±16274	468938±29638	445524±35361	424550±24847	0.402
44	245.093	203.084	246.1	C13H14N2O3	[M-H]-	N-Acetyl-L-Tryptophan	Amino acids and their derivatives	1218-34-4	181380±23949	256449±13364	222909±6243	250286±11751	259547±25024	401894±23713	0.027
45	263.139	70.0638	262.132	C14H18N2O3	[M+H]+	L-Prolyl-L-Phenylalanine	Amino acids and their derivatives	13589-02-1	122830±5393	241933±19376	227375±25303	170234±6591	161837±31037	161978±9957	0.014
46	166.053	102.055	165.046	C5H11NO3S	[M+H]+	L-Methionine Sulfoxide	Amino acids and their derivatives	3226-65-1	6146576±186610	7175572±100205	6327612±466079	5928157±247849	6009447±175383	7033691±435178	0.088
47	196.097	91.0546	195.089	C10H13NO3	[M+H]+	L-Tyrosine methyl ester	Amino acids and their derivatives	1080-06-4	380489±11963	112116±14145	113770±7084	91131±3367	107178±4136	163221±10106	0.024
48	265.155	72.0813	264.147	C14H20N2O3	[M+H]+	L-Valyl-L-Phenylalanine	Amino acids and their derivatives	3918-92-1	180807±8938	346480±21147	336447±40162	299116±19437	326186±35520	272026±17147	0.051
49	231.17	72.0808	230.163	C11H22N2O3	[M+H]+	L-Valyl-L-Leucine	Amino acids and their derivatives	3989-97-7	334299±24597	640092±55636	639693±21874	668118±37192	601181±43579	573225±36422	0.078
50	205.096	146.06	204.09	C11H12N2O2	[M+H]+	cyclo-(Gly-Phe)	Amino acids and their derivatives	10125-07-2	2965915±8768	3287695±278604	3106907±153253	2669936±203662	2614650±84323	2867709±205445	0.015
51	206.084	58.0299	207.089	C11H13NO3	[M-H]-	N-Acetyl-L-phenylalanine	Amino acids and their derivatives	2018-61-3	110018±9595	141632±25945	136189±22263	159657±7866	184005±26816	187124±13623	0.053
52	197.129	70.0674	196.121	C10H16N2O2	[M+H]+	Cyclo(D-Val-L-Pro)	Amino acids and their derivatives	27483-18-7	386286±41794	423187±21670	374396±25490	355246±51411	345908±16458	388077±30577	0.169
53	245.186	86.0954	244.179	C12H24N2O3	[M+H]+	L-Leucyl-L-Leucine	Amino acids and their derivatives	3303-31-9	274884±25175	495021±5747	416837±105571	416775±73260	409066±39575	391056±31667	0.056
54	203.15	70.0653	202.143	C8H18N4O2	[M+H]+	NG,NG-Dimethyl-L-arginine*	Amino acids and their derivatives	30315-93-6	740817±76520	974572±164157	975988±60855	988108±128320	1146798±80255	853561±69228	0.043
55	262.119	188.071	261.111	C13H15N3O3	[M+H]+	Glycyl-tryptophan	Amino acids and their derivatives	2390-74-1	171814±14933	216175±6786	179025±26763	178573±21489	175397±9463	175857±15139	0.131
56	188.056	128.035	189.064	C7H11NO5	[M-H]-	N-Acetyl-L-glutamic acid	Amino acids and their derivatives	1188-37-0	301826±22024	468704±37813	517130±58765	636332±73107	605106±71311	536224±47071	0.107
57	160.061	98.0237	161.069	C6H11NO4	[M-H]-	N-Acetyl-L-threonine	Amino acids and their derivatives	17093-74-2	134649±35150	105784±16770	123482±21475	139909±27982	153812±39401	128254±11633	0.355
58	311.124	165.055	310.116	C14H18N2O6	[M+H]+	γ-Glutamyltyrosine	Amino acids and their derivatives	7432-23-7	101392±2831	92270±9826	76776±6714	71199±2720	80255±12121	74277±7206	0.038
59	611.148	306.074	612.152	C20H32N6O12S2	[M-H]-	Oxiglutatione	Amino acids and their derivatives	27025-41-8	3692544±620586	4833978±259717	4837414±316608	4669655±848945	4423504±271089	3916825±405390	0.147
60	206.081	131.051	205.074	C11H11NO3	[M+H]+	Cinnamoylglycine	Amino acids and their derivatives	16534-24-0	97711±4115	111383±10394	89903±14768	73326±1339	79126±8724	89369±10573	0.032
61	189.123	86.0964	188.116	C8H16N2O3	[M+H]+	N-Glycyl-L-leucine	Amino acids and their derivatives	869-19-2	260505±6791	473106±147949	478950±44185	592108±266617	415696±29698	388260±49518	0.098
62	224.092	136.076	223.084	C11H13NO4	[M+H]+	N-Acetyl-L-tyrosine	Amino acids and their derivatives	537-55-3	29008±5638	36011±8591	29147±8001	33010±10124	34724±7866	32094±4353	0.821
63	281.113	166.086	280.106	C13H16N2O5	[M+H]+	L-Aspartyl-L-Phenylalanine	Amino acids and their derivatives	13433-09-5	37421±10491	43001±4000	43319±513	40887±10194	48720±5010	38877±5378	0.375
64	199.969	80.9643	200.977	C3H7NO5S2	[M-H]-	S-Sulfo-L-Cysteine	Amino acids and their derivatives	1637-71-4	39763±9457	23487±2947	31762±8524	18790±1342	18125±4965	49478±6974	0.022
65	313.155	166.086	312.147	C18H20N2O3	[M+H]+	L-Phenylalanyl-L-phenylalanine	Amino acids and their derivatives	2577-40-4	23090±3458	30224±5001	17482±2895	26738±10759	21541±9604	30574±4733	0.167
66	174.113	86.0964	173.105	C8H15NO3	[M+H]+	N-Acetyl-L-leucine	Amino acids and their derivatives	1188-21-2	71344±7322	171607±31001	153179±71780	84346±3008	63464±14080	105461±16454	0.016
67	351.079	164.034	352.087	C10H16N4O10	[M-H]-	N-Carbamoyl-L-aspartate	Amino acids and their derivatives	13184-27-5	23693±5354	21874±4501	34454±9041	26128±3194	26412±4742	33189±5330	0.252
68	162.041	144.03	163.048	C5H9NO5	[M-H]-	4-Hydroxy-L-glutamic acid	Amino acids and their derivatives	3913-68-6	38645±15648	58421±7963	55425±1881	59948±8276	60273±9007	66930±10756	0.402
69	247.13	86.0968	246.122	C10H18N2O5	[M+H]+	Leu-Asp	Amino acids and their derivatives	32949-40-9	1263300±69065	1256967±37055	830892±105979	701248±34827	767390±36470	902728±157282	0.015
70	192.069	56.0494	191.062	C7H13NO3S	[M+H]+	N-Acetyl-L-Methionine	Amino acids and their derivatives	65-82-7	18373±4057	72522±9874	46495±8957	48308±9810	35023±4801	37520±7269	0.017
71	292.13	188.071	291.122	C14H17N3O4	[M+H]+	Ser-Trp	Amino acids and their derivatives	94421-70-2	95946±11038	133494±20624	116040±12087	101316±3435	104897±14729	100962±19746	0.131
72	189.123	126.091	188.116	C8H16N2O3	[M+H]+	N6-Acetyl-L-lysine	Amino acids and their derivatives	692-04-6	325341±42285	303571±31623	258149±73020	260258±22378	249082±10336	265149±53079	0.167
73	182.082	136.076	181.074	C9H11NO3	[M+H]+	3-Hydroxy-L-phenylalanine	Amino acids and their derivatives	587-33-7	26107221±3839904	20522476±969143	13549321±1870119	16161736±648923	17395076±1848414	16060150±3301130	0.014
74	136.042	91.0537	135.035	C4H9NO2S	[M+H]+	S-Methyl-L-cysteine	Amino acids and their derivatives	1187-84-4	1061296±110602	929989±19147	599443±114196	638216±65211	772665±56860	717124±155429	0.012
75	175.121	70.0658	174.137	C8H18N2O2	[M+H]+	N(6),N(6)-Dimethyl-L-lysine	Amino acids and their derivatives	2259-86-1	1889504±382866	3733155±280848	2886848±502000	2171642±164075	2121538±708307	2702344±646640	0.032
76	130.052	58.0302	131.058	C5H9NO3	[M-H]-	N-acetyl-beta-alanine	Amino acids and their derivatives	3025-95-4	9275±5194	17233±8790	21183±7027	22455±7870	24600±3885	20539±6075	0.228
77	235.165	118.086	234.158	C10H22N2O4	[M+H]+	L-Lysine-Butanoic Acid	Amino acids and their derivatives	80407-71-2	70883±21885	52969±10172	59749±6385	46294±17743	47000±6057	49880±16029	0.384
78	307.081	139.039	306.074	C15H14O7	[M+H]+	GC*	Flavonoids	970-73-0	45228363±1539858	45877407±4021852	44542496±1878635	50785056±389230	46230512±1385334	43624353±902850	0.095
79	307.081	139.039	306.074	C15H14O7	[M+H]+	EGC*	Flavonoids	970-74-1	5573035±616266	7395401±166308	7613966±965061	6564037±512885	6440951±167799	6330556±239526	0.026
80	443.097	139.039	442.09	C22H18O10	[M+H]+	ECG*	Flavonoids	1257-08-5	4830091±405894	4637295±456806	4955007±227520	5158067±273269	5108333±444342	5030020±196343	0.504
81	443.097	139.039	442.09	C22H18O10	[M+H]+	CG*	Flavonoids	130405-40-2	962950±83413	983085±183713	875593±34523	991279±53296	1065752±105720	988108±39252	0.312
82	459.092	139.039	458.085	C22H18O11	[M+H]+	EGCG*	Flavonoids	989-51-5	3340157±134889	3354386±355203	3457045±298316	3464387±237593	3180320±100707	3428390±203608	0.73
83	291.086	139.038	290.079	C15H14O6	[M+H]+	C*	Flavonoids	154-23-4	540829±11565	546353±24261	539180±47095	611016±54121	603572±81048	538281±34643	0.367
84	451.124	289.072	452.132	C21H24O11	[M-H]-	Catechin-5-O-glucoside	Flavonoids	-	130524±22396	189739±5444	220146±14487	159009±7417	193034±5352	265354±17412	0.011
85	593.165	441.114	592.158	C31H28O12	[M+H]+	8,8'-Methylenebiscatechin	Flavonoids	81555-08-0	57516±12797	78602±7676	73246±15234	74798±3489	83623±15866	70637±4999	0.228
86	611.143	287.054	610.132	C30H26O14	[M+H]+	Gallocatechin-(4α→8)-gallocatechin	Flavonoids	-	678960±15366	682576±203834	717808±15123	615892±181204	675965±104437	684767±49156	0.657
87	291.086	139.036	290.079	C15H14O6	[M+H]+	EC*	Flavonoids	490-46-0	1463141±173412	1314880±188656	1302493±239492	1553484±134311	1354835±135501	1486033±127095	0.393
88	275.091	107.049	274.084	C15H14O5	[M+H]+	Epiafzelechin	Flavonoids	24808-04-6	1889158±143651	3853717±1256483	2971233±1432974	1980070±227472	2023133±133706	1899943±178797	0.057
89	561.14	289.071	562.148	C30H26O11	[M-H]-	Epicatechin-epiafzelechin	Flavonoids	-	33076±2325	41923±8560	48765±8621	74003±7005	47453±6210	125454±11917	0.034
90	455.098	289.07	456.106	C23H20O10	[M-H]-	EGCG3"Me	Flavonoids	-	557975±12687	66920±3327	580682±18522	285124±22759	553388±86611	674797±82268	0.021
91	459.092	139.039	458.085	C22H18O11	[M+H]+	GCG*	Flavonoids	4233-96-9	3054796±516852	2377304±866298	3166397±414382	3292541±340349	2684394±232584	2811948±372150	0.209
92	551.083	169.015	552.09	C27H20O13	[M-H]-	Epitheaflagallin-3-O-Gallate	Flavonoids	102067-92-5	260220±27745	201300±56302	130826±35370	99789±32221	111321±1736	405191±72839	0.047
93	865.198	407.1	866.206	C45H38O18	[M-H]-	Catechin-catechin-catechin	Flavonoids	-	32774±4634	37800±9783	42562±7820	41666±5062	34920±6246	74436±14924	0.345
94	451.125	289.073	452.132	C21H24O11	[M-H]-	Epicatechin-3'-O-β-D-glucopyranoside	Flavonoids	-	149505±17314	245895±2297	244988±27762	285802±27724	312080±41369	226762±107245	0.024
95	465.103	303.05	465.103	C21H21O12+	[M]+	Delphinidin-3-O-glucoside (Mirtillin)	Flavonoids	50986-17-9	3006622±153387	3228355±155440	3608054±92743	4151812±312039	4024999±304360	3487781±64176	0.012
96	449.108	287.055	449.108	C21H21O11+	[M]+	Cyanidin-3-O-glucoside (Kuromanin)	Flavonoids	47705-70-4	4155068±133237	2636227±73001	3619458±185949	3196194±331705	3343317±322335	3026079±120845	0.019
97	433.113	271.06	433.113	C21H21O10+	[M]+	Pelargonidin-3-O-glucoside	Flavonoids	47684-27-5	983011±70207	733822±14597	703441±59595	445660±52186	649618±63058	700622±53418	0.017
98	595.145	287.056	594.137	C30H26O13	[M+H]+	Kaempferol-3-O-(6''-p-Coumaroyl)galactoside*	Flavonoids	-	2591128±157698	1638884±103103	2642147±158263	2455347±133483	2319874±232521	2382941±10131	0.056
99	481.097	319.057	480.09	C21H20O13	[M+H]+	Myricetin-3-O-galactoside*	Flavonoids	15648-86-9	5320688±217047	7072371±405436	5277423±560771	5758413±523382	5966633±270922	5953066±35590	0.045
100	611.161	303.049	610.153	C27H30O16	[M+H]+	Quercetin-3-O-neohesperidoside*	Flavonoids	117611-67-3	15025192±1150522	29244855±1799163	23326575±1859547	20035792±840868	20371749±599730	21292330±199978	0.012
101	447.093	285.041	448.101	C21H20O11	[M-H]-	Kaempferol-7-O-glucoside*	Flavonoids	16290-07-6	1790991±256428	2610694±1005666	3219827±1354275	4266481±262473	4361681±197669	7272690±78277	0.043
102	481.134	319.046	480.127	C22H24O12	[M+H]+	3',5',5,7-Tetrahydroxy-4'-methoxyflavanone-3'-O-glucoside	Flavonoids	-	6091197±466486	7396500±368152	6652551±329435	6378307±636844	6044624±523593	6807280±73625	0.065
103	593.13	285.04	594.137	C30H26O13	[M-H]-	Luteolin-7-O-(6''-caffeoyl)rhamnoside	Flavonoids	-	686880±26311	508929±22934	922470±15516	899312±80042	1039102±41464	942761±13139	0.012
104	579.171	313.073	578.164	C27H30O14	[M+H]+	Isovitexin-2''-O-rhamnoside	Flavonoids	-	1894443±168044	2933493±652403	2862365±249449	3777305±1494050	4995081±1955085	2797003±40225	0.095
105	743.203	287.057	742.196	C32H38O20	[M+H]+	Luteolin-7-O-Sophoroside-5-O-arabinoside	Flavonoids	-	494785±234423	4962215±339045	1943583±549252	381957±157865	458443±132278	1788647±28272	0.024
106	481.098	319.045	480.09	C21H20O13	[M+H]+	Myricetin-3-O-β-D-glucoside*	Flavonoids	19833-12-6	5173728±341095	7121171±496914	5370445±477744	6204346±601043	5783936±187540	6008293±171815	0.032
107	595.166	287.057	594.159	C27H30O15	[M+H]+	Kaempferol-3-O-glucoside-7-O-rhamnoside*	Flavonoids	2392-95-2	987995±76928	1813931±243591	1284381±78830	884259±16657	1090321±165404	1320877±38839	0.015
108	595.164	287.055	594.159	C27H30O15	[M+H]+	Kaempferol-3-O-neohesperidoside*	Flavonoids	32602-81-6	920285±102152	1514344±246336	1260236±342760	860976±129104	784594±28795	949012±32044	0.021
109	757.218	303.051	756.211	C33H40O20	[M+H]+	Quercetin-3-O-(2''-O-Rhamnosyl)rutinoside	Flavonoids	55696-57-6	2229283±347083	32556076±1736335	16536970±1391255	2605786±210686	2910408±197629	14557221±507693	0.013
110	611.139	147.044	610.132	C30H26O14	[M+H]+	Quercetin-3-O-(6''-O-p-Coumaroyl)galactoside	Flavonoids	-	495980±25319	216571±17947	425241±28653	317324±29929	385676±35560	383298±14232	0.013
111	757.216	287.055	756.211	C33H40O20	[M+H]+	Camelliaside A	Flavonoids	135095-52-2	2640954±94297	2160672±133882	2471757±130693	2484102±183449	2462060±191254	2545859±99503	0.097
112	447.093	285.041	448.101	C21H20O11	[M-H]-	Kaempferol-3-O-galactoside (Trifolin)*	Flavonoids	23627-87-4	1653783±262513	2404797±879174	3518235±343498	3834482±96544	4365201±384111	7293705±290608	0.016
113	757.208	303.05	756.211	C33H40O20	[M+H]+	Quercetin-3-O-rutinoside-7-O-rhamnoside	Flavonoids	-	2001185±233920	32324596±4174087	21900196±9936496	2188794±105894	2774835±278308	12931761±519692	0.014
114	433.113	271.074	432.106	C21H20O10	[M+H]+	Apigenin-4'-O-glucoside*	Flavonoids	-	968876±75804	1209544±102219	1212541±149380	1163186±177613	1323469±22263	981850±40632	0.132
115	579.169	271.07	578.164	C27H30O14	[M+H]+	Apigenin-7-O-neohesperidoside (Rhoifolin)	Flavonoids	17306-46-6	769474±58165	651790±130813	691682±27025	550214±66716	639472±55676	617587±25813	0.06
116	611.161	287.05	610.153	C27H30O16	[M+H]+	Luteolin-7-O-gentiobioside	Flavonoids	-	3764718±68196	3927270±516173	3639973±37527	5588263±2958206	3725443±409597	3822131±169815	0.371
117	343.118	313.079	342.11	C19H18O6	[M+H]+	5,7,8,4'-Tetramethoxyflavone	Flavonoids	6601-66-7	32390±30247	6890±988	17797±3976	11727±128	7323±640	15515±694	0.016
118	595.145	287.055	594.137	C30H26O13	[M+H]+	Kaempferol-3-O-(2''-p-Coumaroyl)galactoside	Flavonoids	-	497072±42489	491121±27155	653156±39941	587694±32676	562846±15008	530063±24116	0.015
119	449.108	287.055	448.101	C21H20O11	[M+H]+	Kaempferol-3-O-glucoside (Astragalin)*	Flavonoids	480-10-4	6543987±887116	7041094±1147024	7547283±337985	9255814±1247626	7806061±157843	7972012±372282	0.054
120	509.128	347.076	508.122	C23H24O13	[M+H]+	5,6,3',4'-Tetrahydroxy-3,7-dimethoxyflavone-6-O-glucoside	Flavonoids	-	1081404±303334	879139±293164	655578±70054	463127±21268	405442±93233	577794±27378	0.021
121	903.258	287.056	902.248	C42H46O22	[M+H]+	Kaempferol-3-O-(6'''-p-Coumaroyl)glucosyl-(1→2)-Glucoside-7-O-Rhamnoside	Flavonoids	-	334009±41844	22821±3602	216688±17792	62245±25008	32175±11618	123948±5892	0.013
122	449.072	316.024	450.08	C20H18O12	[M-H]-	Myricetin-3-O-xyloside*	Flavonoids	-	189771±21132	271986±13027	349934±15964	382577±35709	515155±16320	752262±36284	0.01
123	595.145	287.057	594.137	C30H26O13	[M+H]+	Kaempferol-3-O-(6''-p-Coumaroyl)glucoside*	Flavonoids	20316-62-5	3128155±526548	2199660±509879	3562870±263129	3252985±297418	3175273±49934	3044132±147696	0.079
124	565.155	457.111	564.148	C26H28O14	[M+H]+	Apigenin-8-C-(2''-glucosyl)arabinoside	Flavonoids	-	1724091±275455	2026582±147536	2281339±299778	2643164±181687	2275693±383108	2303247±112343	0.075
125	301.035	151.004	302.043	C15H10O7	[M-H]-	Tricetin (5,7,3',4',5'-Pentahydroxyflavone)	Flavonoids	520-31-0	249911±16983	334337±22569	381421±37661	346337±19094	448967±48364	529584±26150	0.019
126	595.166	287.06	594.159	C27H30O15	[M+H]+	Kaempferol-3-O-glucorhamnoside*	Flavonoids	40437-72-7	863189±62360	1365678±233077	1495746±432991	828566±84842	880100±196170	1105859±54696	0.034
127	447.129	285.076	446.121	C22H22O10	[M+H]+	Acacetin-7-O-galactoside*	Flavonoids	-	50277±1987	81353±9965	73550±9223	57269±7141	61959±10653	51245±2574	0.032
128	419.134	257.081	418.126	C21H22O9	[M+H]+	Pinocembrin-7-O-glucoside (Pinocembroside)	Flavonoids	75829-43-5	142547±3382	125263±6789	154681±6190	329129±24422	279717±36781	198512±9977	0.01
129	611.161	287.057	610.153	C27H30O16	[M+H]+	Luteolin-7,3'-di-O-glucoside	Flavonoids	52187-80-1	4013144±427534	4054632±1027345	3527201±106112	6920557±2342147	7548062±728118	3836720±215282	0.038
130	271.061	151.004	272.068	C15H12O5	[M-H]-	Naringenin*	Flavonoids	480-41-1	100379±19244	97955±20666	140827±17372	130202±7699	150349±9874	75281±4268	0.025
131	433.078	300.033	434.085	C20H18O11	[M-H]-	Quercetin-3-O-arabinoside*	Flavonoids	22255-13-6	159949±46438	261786±3249	343243±19016	526373±89716	528799±30496	1103051±63583	0.012
132	595.168	433.116	594.159	C27H30O15	[M+H]+	Vitexin-2''-O-galactoside	Flavonoids	-	7941236±1386660	8362221±1590192	8948354±1366320	7283418±812557	8524183±228059	7489935±440211	0.547
133	285.041	151.004	286.048	C15H10O6	[M-H]-	Kaempferol (3,5,7,4'-Tetrahydroxyflavone)	Flavonoids	520-18-3	104888±8071	331057±20269	318794±2800	373945±22278	391994±16731	312442±18466	0.014
134	403.102	367.08	402.095	C20H18O9	[M+H]+	Apigenin-8-C-Arabinoside	Flavonoids	-	144208±8648	208840±25372	192679±14168	225235±35587	249555±30715	180780±10862	0.041
135	481.098	319.048	480.09	C21H20O13	[M+H]+	Quercetagetin-7-O-glucoside(Quercetagitrin)	Flavonoids	548-75-4	5678577±165828	6640818±454546	6114856±167764	6232419±379559	5922781±343507	6184814±376322	0.109
136	741.202	147.3	740.195	C36H36O17	[M+H]+	Vitexin-7-O-(6''-p-coumaroyl)glucoside	Flavonoids	-	82051±38131	866341±89204	343147±29899	40315±7363	62736±6804	299540±18302	0.014
137	565.155	409.092	564.148	C26H28O14	[M+H]+	Isoschaftoside	Flavonoids	52012-29-0	4183024±588698	4211304±574527	4776802±530035	4920835±838682	5871521±660877	4819517±299788	0.071
138	435.092	303.05	434.085	C20H18O11	[M+H]+	Quercetin-3-O-α-L-arabinofuranoside	Flavonoids	572-30-5	4843591±278595	5104079±162791	5775551±71496	6448929±152478	6170244±367681	5596433±355081	0.016
139	435.092	303.061	434.085	C20H18O11	[M+H]+	Quercetin-3-O-xyloside (Reynoutrin)*	Flavonoids	549-32-6	4923598±395208	5394476±205946	5908372±375789	6511036±642068	6561188±878984	5654770±373987	0.03
140	535.108	287.055	534.101	C24H22O14	[M+H]+	Kaempferol-3-O-(6''-malonyl)glucoside*	Flavonoids	-	7259431±216882	17686306±1382912	11948137±985378	8398581±384689	8727182±82595	10518105±705227	0.009
141	773.21	303.05	772.206	C33H40O21	[M+H]+	Quercetin-7-O-rutinoside-4'-O-glucoside	Flavonoids	-	39088427±3109830	38754208±784923	42804077±1847630	47040455±3906827	44581793±1653712	41592297±2789989	0.027
142	417.083	285.036	418.09	C20H18O10	[M-H]-	Kaempferol-3-O-arabinoside	Flavonoids	5041-67-8	54501±16229	79392±11466	132173±5053	151752±11386	181799±13469	203844±14101	0.01
143	465.1	303.05	464.096	C21H20O12	[M+H]+	Quercetin-5-O-β-D-glucoside*	Flavonoids	-	6373756±276662	6734202±113692	7388757±456609	8901398±399656	8670771±420744	7852316±544917	0.013
144	433.113	313.072	432.106	C21H20O10	[M+H]+	Apigenin-6-C-glucoside (Isovitexin)*	Flavonoids	38953-85-4	3113084±161676	5901546±2350053	4892835±869849	8673502±584681	8620812±3205412	4768550±350553	0.029
145	433.113	313.072	432.106	C21H20O10	[M+H]+	Apigenin-8-C-Glucoside (Vitexin)*	Flavonoids	3681-93-4	3113084±161676	5901546±2350053	4892835±869849	8673502±584681	8620812±3205412	4768550±350553	0.029
146	373.13	343.083	372.121	C20H20O7	[M+H]+	3',4',5',5,7-Pentamethoxyflavone	Flavonoids	53350-26-8	9151±4863	5744±2995	9072±695	7422±1559	4721±1734	7698±569	0.215
147	449.108	287.057	450.116	C21H22O11	[M-H]-	Aromadendrin-7-O-glucoside	Flavonoids	28189-90-4	60550±19512	60058±3408	108858±14380	83622±10444	121135±29268	181781±13585	0.023
148	433.12	271.065	434.121	C21H22O10	[M-H]-	Naringenin-4'-O-glucoside	Flavonoids	-	125267±10929	155219±12931	193664±19587	184582±15630	233573±14597	272036±20354	0.013
149	271.061	151.003	272.068	C15H12O5	[M-H]-	3,5,7-Trihydroxyflavanone (Pinobanksin)*	Flavonoids	548-82-3	67835±5736	69801±10448	89908±10229	78484±15365	97882±14585	56327±4217	0.073
150	433.113	271.066	432.106	C21H20O10	[M+H]+	Apigenin-7-O-glucoside(Cosmosiin)*	Flavonoids	578-74-5	1088444±143702	1212102±154778	1198184±202013	1247218±162406	1347465±90827	1088138±81545	0.371
151	301.071	286.048	300.063	C16H12O6	[M+H]+	5,7,3'-Trihydroxy-4'-methoxyflavone*	Flavonoids	520-34-3	6864±2006	3290±1577	4067±664	5272±1859	7462±802	5657±426	0.083
152	491.118	287.05	490.111	C23H22O12	[M+H]+	Kaempferol-3-O-(2''-O-acetyl)glucoside	Flavonoids	-	2547777±138822	1998406±179076	2585255±27267	3249594±101339	2970095±379188	2671323±203187	0.02
153	535.108	287.05	534.101	C24H22O14	[M+H]+	Luteolin-7-O-(6''-malonyl)glucoside*	Flavonoids	-	7789312±631322	15189872±1461025	11042254±2065126	8748704±278408	9099439±500062	10374888±806861	0.013
154	611.161	449.107	610.153	C27H30O16	[M+H]+	Orientin-2''-O-galactoside	Flavonoids	-	707982±59151	916796±114518	931969±96660	840215±113091	729615±73509	801644±62779	0.045
155	565.15	433.11	564.148	C26H28O14	[M+H]+	Isovitexin-2''-O-xyloside*	Flavonoids	-	596897±69344	859296±63383	895559±163450	1042484±20075	1197069±120005	909761±71763	0.019
156	463.124	301.07	462.116	C22H22O11	[M+H]+	Diosmetin-7-O-glucoside*	Flavonoids	20126-59-4	425897±58829	575677±8505	463756±7335	454385±70975	463274±61270	432471±34240	0.087
157	595.167	433.122	594.159	C27H30O15	[M+H]+	4'-O-Glucosylvitexin	Flavonoids	38950-94-6	5673252±526147	6839749±1077944	7069506±898758	8763468±1609840	10107683±606368	8638100±686701	0.052
158	331.081	316.058	330.074	C17H14O7	[M+H]+	4',5,7-Trihydroxy-3',6-dimethoxyflavone	Flavonoids	18085-97-7	49966±5093	67808±6060	71283±2402	49821±3647	47400±1802	60221±4929	0.029
159	601.119	287.056	600.111	C28H24O15	[M+H]+	Kaempferol-3-O-(6''-galloyl)galactoside	Flavonoids	-	1633865±131239	608974±238028	1387749±149013	972597±88515	1187886±224430	1237696±102561	0.015
160	419.097	383.07	418.09	C20H18O10	[M+H]+	Luteolin-8-C-arabinoside	Flavonoids	-	34849±2553	37411±9302	32349±13933	30599±7207	46543±2358	41800±3540	0.161
161	597.18	289.072	596.174	C27H32O15	[M+H]+	Eriodictyol-7-O-Rutinoside (Eriocitrin)	Flavonoids	13463-28-0	1293519±118108	2279802±287860	1755674±166345	1431551±146127	1460770±119451	1803582±153085	0.027
162	609.146	301.037	610.153	C27H30O16	[M-H]-	Quercetin-3-O-rutinoside (Rutin)	Flavonoids	153-18-4	1001565±208304	2522951±237425	2234518±62835	1969192±212091	1961928±182617	2286686±195709	0.016
163	433.114	271.068	434.121	C21H22O10	[M-H]-	Naringenin-7-O-glucoside (Prunin)	Flavonoids	529-55-5	190185±27671	320177±35364	461632±30229	533515±109789	520547±65232	771148±66926	0.021
164	479.118	317.06	478.111	C22H22O12	[M+H]+	Isorhamnetin-7-O-glucoside (Brassicin)*	Flavonoids	6743-96-0	534243±19269	613273±56079	651038±79640	656242±110000	663484±74601	623300±54133	0.113
165	617.114	153.018	616.106	C28H24O16	[M+H]+	Quercetin-3-O-(6''-O-galloyl)galactoside	Flavonoids	53171-28-1	104374±18197	30648±4070	93994±12340	49901±13740	78075±2354	130838±11547	0.011
166	535.108	287.055	534.101	C24H22O14	[M+H]+	Kaempferol-3-O-(6''-malonyl)galactoside*	Flavonoids	-	5905978±338416	15871348±1797881	10611087±624864	7341652±1211364	8042774±1296603	9792686±870162	0.012
167	579.15	287.056	578.142	C30H26O12	[M+H]+	Kaempferol-3-O-(4''-p-coumaroyl)rhamnoside	Flavonoids	-	93667±3402	57186±3005	101120±4090	87445±3115	102070±1980	99634±8921	0.016
168	359.113	344.089	358.105	C19H18O7	[M+H]+	5-Hydroxy-6,7,3',4'-tetramethoxyflavone	Flavonoids	21763-80-4	587331±14370	919407±67802	563226±21960	200328±21357	246500±28151	549967±49388	0.01
169	597.145	303.049	596.138	C26H28O16	[M+H]+	Quercetin-3-O-sambubioside*	Flavonoids	83048-35-5	131209±11204	175230±30923	171529±15133	185666±17547	148833±53423	165714±15468	0.212
170	465.102	303.058	464.096	C21H20O12	[M+H]+	Quercetin-3-O-galactoside (Hyperin)*	Flavonoids	482-36-0	6536420±467790	6439064±278754	6655075±567066	8133042±43444	7861293±148416	7110037±665302	0.028
171	565.155	427.101	564.148	C26H28O14	[M+H]+	Apigenin-6-C-(2''-glucosyl)arabinoside	Flavonoids	-	5703278±527206	6069963±166532	5525303±409536	9174437±3883203	6729764±744036	6939030±680085	0.042
172	331.081	315.05	330.074	C17H14O7	[M+H]+	Tricin	Flavonoids	520-32-1	102219±5583	127166±4855	140952±7785	105610±2121	107891±6804	122033±11969	0.024
173	507.117	303.052	506.106	C23H22O13	[M+H]+	Quercetin-3-O-(6''-O-acetyl)glucoside	Flavonoids	-	109603±15556	127235±4977	124170±18711	193833±22594	197612±26261	149529±14755	0.025
174	565.155	433.11	564.148	C26H28O14	[M+H]+	Apigenin-6-C-(2''-xylosyl)glucoside*	Flavonoids	-	639667±53576	862981±143734	887165±75261	1073061±104898	1163909±135858	866802±85748	0.02
175	565.155	433.11	564.148	C26H28O14	[M+H]+	Apigenin-8-C-(2''-xylosyl)glucoside*	Flavonoids	-	639667±53576	862981±143734	887165±75261	1073061±104898	1163909±135858	866802±85748	0.02
176	595.166	313.07	594.159	C27H30O15	[M+H]+	Isovitexin-4'-O-glucoside	Flavonoids	19416-87-6	2416229±26115	3340938±281127	4200015±785940	4456256±239811	5447707±849012	3596228±359169	0.017
177	463.088	301.036	464.096	C21H20O12	[M-H]-	Quercetin-7-O-glucoside*	Flavonoids	491-50-9	72558±7143	172301±23116	187795±42493	226068±26089	254754±15000	144840±14768	0.018
178	465.103	303.051	464.096	C21H20O12	[M+H]+	Quercetin-3-O-glucoside (Isoquercitrin)*	Flavonoids	482-35-9	5909332±388097	6295329±546065	5971427±295107	7192526±175770	7285402±829531	7147757±733269	0.043
179	449.108	287.062	448.101	C21H20O11	[M+H]+	Luteolin-7-O-glucoside (Cynaroside)*	Flavonoids	5373-11-5	12831682±753626	13213793±2206054	15255618±915730	15687252±956640	14321386±557994	14794199±1520624	0.07
180	449.108	287.05	448.101	C21H20O11	[M+H]+	Luteolin-4'-O-glucoside*	Flavonoids	6920-38-3	3764447±423180	3607739±353281	4189912±167583	4115748±150751	4224820±128133	3789689±392081	0.122
181	479.118	317.062	478.111	C22H22O12	[M+H]+	Isorhamnetin-3-O-Glucoside*	Flavonoids	5041-82-7	541923±19244	572811±54674	671429±28305	655197±57624	675175±34783	595110±62175	0.048
182	287.056	135.045	288.063	C15H12O6	[M-H]-	Eriodictyol (5,7,3',4'-Tetrahydroxyflavanone)	Flavonoids	552-58-9	11381±2265	28663±5810	31427±9029	39810±3336	43831±3121	31696±3326	0.018
183	535.145	499.123	534.137	C25H26O13	[M+H]+	Apigenin-6-C-arabinoside-8-C-xyloside*	Flavonoids	-	1759416±292379	2183184±180771	2381266±116234	2186887±235689	2495855±99376	2320824±243575	0.043
184	579.135	283.06	578.127	C26H26O15	[M+H]+	Apigenin-6-C-(2''-glucuronyl)xyloside	Flavonoids	-	2439792±417156	2730338±130982	3070567±251210	3288207±295643	3645669±535588	2903349±306221	0.027
185	489.107	285.04	490.111	C23H22O12	[M-H]-	Kaempferol-3-O-(6''-O-acetyl)glucoside	Flavonoids	-	269342±49440	913687±72293	607029±83672	384971±60422	469511±32322	642483±67888	0.009
186	449.108	299.055	448.101	C21H20O11	[M+H]+	Luteolin-8-C-glucoside (Orientin)*	Flavonoids	28608-75-5	712868±229858	794960±186405	1251034±293604	1298201±622611	1437244±324552	905096±96131	0.067
187	319.045	273.04	318.038	C15H10O8	[M+H]+	3,3',4',5,6,7-Hexahydroxyflavone	Flavonoids	90-18-6	46925±8717	67480±10306	66525±5843	70564±8712	96583±2999	69374±7449	0.029
188	463.123	301.07	462.116	C22H22O11	[M+H]+	Diosmetin-7-O-galactoside*	Flavonoids	-	388365±35778	631429±63100	466270±29898	467928±74893	452112±67783	462384±49942	0.054
189	773.214	287.055	772.206	C33H40O21	[M+H]+	Kaempferol-3-O-sophoroside-7-O-glucoside	Flavonoids	-	90043±36284	101825±4030	115838±5617	59125±11378	52437±13741	97858±10570	0.053
190	757.197	147.1	756.19	C36H36O18	[M+H]+	Isoorientin-7-O-(6''-p-coumaroyl)glucoside	Flavonoids	-	628624±10730	642663±17074	577515±57761	637741±8887	631413±41798	581799±63025	0.468
191	609.181	301.079	608.174	C28H32O15	[M+H]+	Diosmetin-7-O-rutinoside (Diosmin)*	Flavonoids	520-27-4	259209±44891	208227±14795	236518±30576	278485±28083	232017±18037	207448±22680	0.161
192	579.171	433.109	578.164	C27H30O14	[M+H]+	Vitexin-2''-O-rhamnoside	Flavonoids	64820-99-1	9090660±1103844	9540364±884429	10654497±183031	9035521±1138816	8897581±189558	8887966±977618	0.124
193	287.056	259.065	288.063	C15H12O6	[M-H]-	Aromadendrin (Dihydrokaempferol)	Flavonoids	480-20-6	8981±541	18231±3022	19926±3161	25507±8275	27495±7297	19419±2150	0.056
194	303.052	151.03	304.058	C15H12O7	[M-H]-	5,7,3',4',5'-Pentahydroxydihydroflavone	Flavonoids	-	78061±13943	130129±10241	171889±38009	187903±9231	216921±18869	168277±18665	0.021
195	595.166	577.156	594.159	C27H30O15	[M+H]+	Vitexin-2''-O-glucoside	Flavonoids	61360-94-9	472832±230006	514719±48304	517151±97462	519648±73441	595530±95550	459712±54462	0.73
196	741.226	433.115	740.216	C33H40O19	[M+H]+	Luteolin-7-O-(2''-O-rhamnosyl)rutinoside	Flavonoids	-	103266±7241	122400±8096	105638±9600	90567±17461	95384±24134	126270±15130	0.151
197	601.119	287.056	600.111	C28H24O15	[M+H]+	Kaempferol-3-O-(2''-galloyl)glucoside	Flavonoids	76343-90-3	89053±7243	68746±6673	98412±24227	108466±13492	124779±11014	100394±12038	0.038
198	595.166	287.053	594.159	C27H30O15	[M+H]+	Kaempferol-3-O-rutinoside*	Flavonoids	17650-84-9	903644±34182	1517059±361200	1051226±111735	738912±100128	945366±114177	1053090±131322	0.023
199	449.108	303.059	448.101	C21H20O11	[M+H]+	Quercetin-3-O-rhamnoside(Quercitrin)	Flavonoids	522-12-3	835977±221015	1004509±64147	952373±73426	1214773±119914	1107532±108543	951692±119460	0.059
200	579.171	287.055	578.164	C27H30O14	[M+H]+	Kaempferol-3,7-O-dirhamnoside	Flavonoids	482-38-2	238877±59694	408417±92321	307195±35437	259957±33604	282162±47445	305983±40037	0.077
201	627.156	303.058	626.148	C27H30O17	[M+H]+	Quercetin-3-O-sophoroside (Baimaside)	Flavonoids	18609-17-1	369718±63535	450585±95023	449099±31479	468398±57434	373934±28188	454272±62469	0.169
202	611.139	147.044	610.132	C30H26O14	[M+H]+	Quercetin-3-O-(6''-O-p-Coumaroyl)glucoside	Flavonoids	-	139431±14687	101719±7912	163764±17199	103260±11214	144506±55138	118019±16404	0.109
203	319.045	273.039	318.038	C15H10O8	[M+H]+	Myricetin	Flavonoids	529-44-2	40390±12464	53448±5094	50374±9492	60580±5817	69869±12749	63627±8901	0.098
204	449.106	287.056	448.101	C21H20O11	[M+H]+	Kaempferol-4'-O-glucoside*	Flavonoids	-	3730081±318867	3670981±192577	3586735±711126	3987496±11716	4242089±390069	3319970±466477	0.284
205	595.166	449.11	594.159	C27H30O15	[M+H]+	Luteolin-6-C-glucoside-7-O-rhamnoside	Flavonoids	-	304083±43081	363381±107958	391890±67926	480182±68485	437650±121808	461796±67697	0.165
206	595.164	313.07	594.159	C27H30O15	[M+H]+	Isovitexin-7-O-glucoside	Flavonoids	20310-89-8	3204742±156672	3565323±141864	3928310±262470	3783851±436997	3289329±243433	3435308±505715	0.077
207	611.161	431.097	610.153	C27H30O16	[M+H]+	Isoorientin-7-O-glucoside	Flavonoids	-	33876±5055	40528±11920	48929±7367	38320±2851	38302±6686	46239±7054	0.255
208	611.161	465.1	610.153	C27H30O16	[M+H]+	Orientin-7-O-glucoside	Flavonoids	-	369881±60007	791417±53660	571028±20404	550123±15218	528023±37353	521476±81414	0.017
209	773.21	303.05	772.206	C33H40O21	[M+H]+	Quercetin-3-O-rutinoside-7-O-glucoside	Flavonoids	-	138353±15801	261556±9923	299150±30989	323040±27331	315634±10542	277896±44381	0.02
210	449.108	299.056	448.101	C21H20O11	[M+H]+	Luteolin-6-C-glucoside (Isoorientin)*	Flavonoids	4261-42-1	416709±31636	761869±202623	642758±33825	903580±327660	717188±133313	711408±114600	0.086
211	595.166	457.134	594.159	C27H30O15	[M+H]+	Apigenin-6,8-di-C-glucoside	Flavonoids	23666-13-9	1840592±307142	2666857±199010	2550750±380223	2396230±242766	3150823±267619	2340348±383512	0.037
212	595.163	303.04	594.159	C27H30O15	[M+H]+	Quercetin-3,7-Di-O-rhamnoside	Flavonoids	28638-13-3	9975±42	121362±25775	58513±38543	19663±11359	15533±10378	47286±7809	0.031
213	433.113	271.06	432.106	C21H20O10	[M+H]+	Apigenin-5-O-glucoside	Flavonoids	28757-27-9	135711±24974	189156±28781	229558±90473	215584±90317	383741±139671	179599±29909	0.071
214	727.208	287.054	726.201	C32H38O19	[M+H]+	Kaempferol-3-O-(2-O-Xylosyl-6-O-Rhamnosyl)Glucoside	Flavonoids	-	214672±11892	208221±18346	191764±17353	181449±45511	209102±16218	208063±34725	0.693
215	301.072	286.054	300.063	C16H12O6	[M+H]+	6,7,8-Tetrahydroxy-5-methoxyflavone*	Flavonoids	-	5819±1200	4272±533	4956±789	6017±1274	7034±2035	4717±822	0.134
216	435.13	167.035	436.137	C21H24O10	[M-H]-	Phloretin-2'-O-glucoside (Phlorizin)	Flavonoids	60-81-1	25444±4206	41734±3778	57474±7037	68590±9257	76831±10609	93529±16330	0.013
217	389.123	359.084	388.116	C20H20O8	[M+H]+	5-Hydroxy-6,7,8,3',4'-pentamethoxyflavone	Flavonoids	2174-59-6	15464±8243	2108±571	11786±1579	6868±1694	3441±195	8911±1566	0.012
218	303.05	137.022	302.043	C15H10O7	[M+H]+	Quercetin	Flavonoids	117-39-5	102807±17914	164765±6072	180564±6181	192339±14617	204810±17480	167540±30048	0.016
219	757.219	287.056	756.211	C33H40O20	[M+H]+	Kaempferol-3-O-sophoroside-7-O-rhamnoside*	Flavonoids	-	102488±21741	94257±5089	103668±15218	81209±40299	169663±73539	115724±20806	0.202
220	469.121	317.08	468.069	C23H16O11	[M+H]+	Isorhamnetin-3-O-gallate	Flavonoids	-	861882±144070	711002±105775	781268±127295	711542±122481	744493±198104	857905±155817	0.657
221	343.118	282.094	342.11	C19H18O6	[M+H]+	5,6,7,4'-Tetramethoxyflavone	Flavonoids	1168-42-9	4738±2845	10144±13388	4615±264	5899±3452	3645±852	3434±630	0.873
222	595.166	287.058	594.159	C27H30O15	[M+H]+	Luteolin-7-O-neohesperidoside*	Flavonoids	25694-72-8	992794±54954	1774906±137206	1284755±127314	987853±97407	894952±34940	1113870±204698	0.014
223	625.174	317.065	624.169	C28H32O16	[M+H]+	Isorhamnetin-3-O-neohesperidoside*	Flavonoids	55033-90-4	189952±106417	202085±26404	301286±187879	240792±144600	221789±48697	149760±28826	0.699
224	595.146	287.055	596.153	C30H28O13	[M-H]-	Eriodictyol-7-O-(6''-O-p-coumaroyl)glucoside	Flavonoids	-	47227±9365	32465±3302	53279±4436	67516±6983	71178±444	67788±13518	0.015
225	771.213	463.1	770.206	C37H38O18	[M+H]+	Isovitexin-7-O-(6''-feruloyl)glucoside	Flavonoids	-	39929±21467	49622±24453	34943±13231	14053±5004	6818±2204	26403±5305	0.026
226	597.145	303.043	596.138	C26H28O16	[M+H]+	Quercetin-3-O-apiosyl(1→2)galactoside*	Flavonoids	-	141237±4458	177774±36356	192125±15319	191244±21879	179638±22146	190055±38207	0.165
227	565.155	529.134	564.148	C26H28O14	[M+H]+	Schaftoside	Flavonoids	51938-32-0	31039±5548	24246±3194	44302±2242	33650±1600	32473±1820	35242±7361	0.029
228	601.119	287.055	600.111	C28H24O15	[M+H]+	Kaempferol-3-O-(2''-galloyl)galactoside	Flavonoids	-	1684108±167896	463307±66126	1379083±258226	906594±84337	1150686±139172	1059829±223527	0.015
229	601.119	287.056	600.111	C28H24O15	[M+H]+	Kaempferol-3-O-(6''-galloyl)glucoside	Flavonoids	56317-05-6	1684108±167896	463307±66126	1379083±258226	906594±84337	1150686±139172	1059829±223527	0.015
230	565.152	287.05	564.148	C26H28O14	[M+H]+	Kaempferol-3-O-arabinoside-7-O-rhamnoside	Flavonoids	-	53701±15542	31093±12139	26065±4397	38762±14131	53925±31317	43804±9284	0.106
231	581.148	303.04	580.143	C26H28O15	[M+H]+	Quercetin-3-O-rhamnosyl(1→2)arabinoside	Flavonoids	-	18862±7976	12297±2267	25281±9793	21213±1939	20625±8200	11355±2454	0.261
232	609.181	301.073	608.174	C28H32O15	[M+H]+	Diosmetin-7-O-Neohesperidoside*	Flavonoids	38665-01-9	171403±51389	97452±22729	85504±21927	94240±2624	118735±38017	93278±21274	0.127
233	535.145	499.123	534.137	C25H26O13	[M+H]+	Apigenin-6,8-di-C-arabinoside*	Flavonoids	-	468867±106637	446638±158819	525329±195685	419110±88009	549256±61377	400005±94307	0.578
234	493.134	331.081	492.127	C23H24O12	[M+H]+	Tricin-7-O-Glucoside	Flavonoids	32769-01-0	272272±71575	233573±47564	240890±41221	177867±47344	197207±63916	173959±41679	0.371
235	625.176	317.075	624.169	C28H32O16	[M+H]+	Isorhamnetin-3-O-rutinoside (Narcissin)*	Flavonoids	604-80-8	158308±57769	198494±29231	264465±158710	244348±117483	287036±103091	164456±39562	0.586
236	449.106	317.06	448.101	C21H20O11	[M+H]+	Isorhamnetin-3-O-arabinoside	Flavonoids	-	51851±9650	67779±7225	69137±15689	50495±6235	50026±15270	49722±12411	0.147
237	757.219	287.055	756.211	C33H40O20	[M+H]+	Kaempferol-3-O-neohesperidoside-7-O-glucoside*	Flavonoids	-	103142±5042	127386±7510	104887±4520	133685±34707	194146±57409	154780±39966	0.067
238	451.123	289.07	450.116	C21H22O11	[M+H]+	Eriodictyol-7-O-glucoside	Flavonoids	38965-51-4	1138656±235000	932469±581626	887478±231314	1072523±39735	1239869±200089	873861±228906	0.52
239	627.156	465.1	626.148	C27H30O17	[M+H]+	Quercetin-3-O-(2''-O-galactosyl)glucoside	Flavonoids	56782-99-1	268985±32296	325907±38827	313378±36289	357787±25556	314475±32646	338330±90376	0.192
240	741.224	287.056	740.216	C33H40O19	[M+H]+	Kaempferol-3-O-rutinoside-7-O-rhamnoside	Flavonoids	-	39006±5464	66299±7271	60950±926	36503±5418	35743±5520	45792±12464	0.026
241	449.108	287.061	448.101	C21H20O11	[M+H]+	Luteolin-3'-O-glucoside*	Flavonoids	-	5885279±633024	7248151±1672029	5964359±1361116	4985594±914711	5627450±508480	5349396±1470044	0.429
242	743.205	303.053	742.196	C32H38O20	[M+H]+	Quercetin-3-O-(2''-O-arabinosyl)rutinoside	Flavonoids	-	42532±14921	71441±1485	66188±7207	58466±4068	70548±6400	70491±19496	0.034
243	565.156	433.114	564.148	C26H28O14	[M+H]+	Vitexin-2''-O-xyloside	Flavonoids	-	528893±31305	601139±57554	895631±474964	612907±55840	568984±28123	517727±147154	0.237
244	581.15	383.2	580.143	C26H28O15	[M+H]+	Luteolin-7-O-glucoside-5-O-arabinoside	Flavonoids	-	33200±7667	31053±4887	39714±2023	41771±7309	56853±16328	53217±15483	0.055
245	611.161	303.052	610.153	C27H30O16	[M+H]+	Quercetin-3-O-glucoside-7-O-rhamnoside*	Flavonoids	-	7364144±461378	10081352±3053039	8392948±2195345	11039198±1597399	10114231±3561126	11289183±3489484	0.415
246	617.114	153.018	616.106	C28H24O16	[M+H]+	Quercetin-3-O-(6''-O-galloyl)glucoside	Flavonoids	56316-75-7	8670±2395	4619±3726	10170±7253	5514±2987	5945±4021	11473±4146	0.38
247	303.087	229.083	302.079	C16H14O6	[M+H]+	Dihydrokaempferide	Flavonoids	137225-59-3	253338±53773	315557±105661	323350±100180	389037±67223	385408±73742	425614±167240	0.284
248	449.073	316.02	450.08	C20H18O12	[M-H]-	Myricetin-3-O-arabinoside*	Flavonoids	132679-85-7	435559±255120	521973±187574	520446±370136	380304±43025	657975±477722	1364513±543591	0.943
249	321.06	153.018	320.053	C15H12O8	[M+H]+	Dihydromyricetin (Ampelopsin)	Flavonoids	27200-12-0	252512±82786	100768±34133	232133±92665	256130±67087	193458±46204	250696±105240	0.086
250	579.15	271.061	578.142	C30H26O12	[M+H]+	Apigenin-7-O-(6''-p-Coumaryl)glucoside	Flavonoids	-	316118±60011	309736±92621	384867±188552	281759±75070	332647±44037	311434±133028	0.76
251	567.098	319.045	566.091	C24H22O16	[M+H]+	Myricetin-3-O-(6''-malony)glucoside	Flavonoids	-	138615±41679	359442±237051	152711±15628	118753±30976	106970±14709	170572±73238	0.054
252	579.172	271.061	580.179	C27H32O14	[M-H]-	Naringenin-7-O-Rutinoside*	Flavonoids	14259-46-2	17182±4079	18912±7230	24462±4860	42739±36606	41309±4725	35756±15952	0.106
253	579.172	271.062	580.179	C27H32O14	[M-H]-	Naringenin-7-O-Neohesperidoside*	Flavonoids	10236-47-2	17182±4079	18912±7230	24462±4860	42739±36606	41309±4725	35756±15952	0.106
254	301.037	151.005	302.043	C15H10O7	[M-H]-	1,2,4,5,8-pentahydroxy-6-methylanthracene-9,10-dione	Flavonoids	-	264807±23756	716751±59189	860313±72417	1350297±10420	1712057±110183	1050725±39657	0.009
255	268.103	136.061	267.09	C16H13NO3	[M+H]+	7-Methoxy-3-[1-(3-pyridyl)methylidene]-4-chromanone	Flavonoids	-	7273030±265710	41950363±2594464	44629674±2312264	53973905±2507257	52594346±5900468	40318696±2783442	0.015
256	247.061	153.018	246.053	C13H10O5	[M+H]+	3,4,5,3'-tetrahydroxybenzophenone	Flavonoids	-	2264966±234778	2433641±139425	2841934±188357	2202805±209912	2259110±173522	1990275±264095	0.066
257	405.08	243.031	406.09	C19H18O10	[M-H]-	1,3,7-trihydroxy-2-[3,4,5-trihydroxy-6-(hydroxymethyl)oxan-2-yl]xanthen-9-one	Flavonoids	-	6080±647	14770±2193	10882±7868	22402±1775	16826±4544	33060±9758	0.04
258	169.014	125.024	170.022	C7H6O5	[M-H]-	Gallic acid	Phenolic acids	149-91-7	39900322±4046010	40387328±2173799	44232451±773853	51436050±332447	58005311±3306197	80607608±120629	0.017
259	153.019	109.029	154.027	C7H6O4	[M-H]-	2,3-Dihydroxybenzoic Acid*	Phenolic acids	303-38-8	164616±7935	353520±6138	422093±25661	714061±56842	1244293±51010	876274±2886	0.009
260	163.04	119.046	164.047	C9H8O3	[M-H]-	2-Hydroxycinnamic acid*	Phenolic acids	583-17-5	32978±10655	71685±23936	95898±6675	106516±28530	139911±20453	148816±582	0.027
261	163.04	119.05	164.047	C9H8O3	[M-H]-	α-Hydroxycinnamic Acid*	Phenolic acids	5801-57-0	32978±10655	71685±23936	95898±6675	106516±28530	139911±20453	148816±582	0.027
262	299.077	137.024	300.084	C13H16O8	[M-H]-	Salicylic acid-2-O-glucoside	Phenolic acids	10366-91-3	97298±5390	130023±13499	135690±5812	144405±11418	131629±10085	144248±798	0.071
263	331.069	169.01	332.074	C13H16O10	[M-H]-	3-O-Galloyl-D-glucose*	Phenolic acids	-	25323741±2742369	25997155±10687796	28736778±1897254	31995573±1786577	34031653±1668920	35367789±708614	0.098
264	237.062	87.0085	238.069	C8H14O8	[M-H]-	Mucic acid Dimethyl Ester	Phenolic acids	-	1967121±149996	1709924±91494	1926524±128631	2000139±59856	1946560±91738	1568603±31734	0.167
265	493.099	169.014	494.106	C22H22O13	[M-H]-	1-O-Caffeoyl-3-O-galloyl-β-D-glucose	Phenolic acids	-	9319897±1618468	10994808±1216417	10136133±6102541	14263727±1317902	15583299±1200110	6572367±133240	0.041
266	289.035	137.024	290.043	C14H10O7	[M-H]-	4-(3,4,5-Trihydroxybenzoxy)benzoic acid	Phenolic acids	-	1048292±60354	1322327±111597	1501389±131833	1844218±77327	1777955±218870	2017421±42383	0.018
267	355.103	193.052	356.111	C16H20O9	[M-H]-	1-O-Feruloyl-β-D-glucose	Phenolic acids	7196-71-6	38494±4472	38378±3614	45749±3130	40795±14050	33400±7465	37305±877	0.199
268	485.093	153.017	484.085	C20H20O14	[M+H]+	1,6-Di-O-galloyl-β-D-glucose	Phenolic acids	-	3181135±122666	4194083±639207	3980460±153903	3208855±564877	3332452±280232	3583753±98933	0.083
269	299.077	137.025	300.084	C13H16O8	[M-H]-	1-O-Salicyloyl-β-D-glucose	Phenolic acids	60517-74-0	2525362±184330	6954454±234695	6332509±367528	5362911±222991	6134683±500674	6164829±196892	0.012
270	341.086	161.02	342.095	C15H18O9	[M-H]-	Vanillic Acid-4-O-Glucuronide	Phenolic acids	-	69063±11653	109470±9602	100586±7406	114199±3500	105627±1459	147522±4885	0.037
271	183.03	124.02	184.037	C8H8O5	[M-H]-	4-O-Methylgallic Acid	Phenolic acids	4319-02-2	728654±45970	876213±49571	986240±84845	990263±38211	1004200±36701	1189810±41548	0.043
272	321.025	125.023	322.033	C14H10O9	[M-H]-	Digallic Acid	Phenolic acids	536-08-3	2693211±229305	4058424±412312	4797032±301157	4999701±339104	5130148±222628	2726375±96188	0.022
273	331.067	313.057	332.074	C13H16O10	[M-H]-	Gallic acid-4-O-glucoside	Phenolic acids	84274-52-2	320343±197939	673492±29761	629474±15479	504561±152087	492682±119420	438665±16052	0.021
274	613.12	169.014	614.127	C29H26O15	[M-H]-	1,6-Di-O-galloyl-3-O-Cinnamoyl-β-D-glucose	Phenolic acids	-	36773±22704	44904±10203	39891±5145	41471±6454	50102±5659	53299±1989	0.448
275	122.06	105.034	121.053	C7H7NO	[M+H]+	Benzamide	Phenolic acids	55-21-0	364690±8905	299255±22593	326260±39596	350864±15207	391937±40143	338960±12843	0.083
276	787.1	617.077	788.107	C34H28O22	[M-H]-	1,2,3,6-Tetra-O-galloyl-β-D-glucose	Phenolic acids	79886-50-3	72386±1871	98831±12649	107857±22011	128420±8659	133741±9980	177903±6758	0.034
277	481.062	300.999	482.07	C20H18O14	[M-H]-	4,6-(S)-Hexahydroxydiphenoyl-β-D-glucose	Phenolic acids	36378-48-0	5901980±481813	3811709±554104	4060861±1341486	4094379±289755	3208506±275523	5100442±195743	0.071
278	301.092	123.009	302.1	C13H18O8	[M-H]-	Isotachioside*	Phenolic acids	31427-08-4	981825±42431	1180524±91536	1238949±28088	1278831±36570	1204820±12887	1276141±52034	0.039
279	301.092	123.009	302.1	C13H18O8	[M-H]-	Tachioside*	Phenolic acids	109194-60-7	909166±46108	1059131±56158	1103709±25586	1190266±43332	1136663±109800	1170699±48562	0.04
280	629.115	163.039	628.106	C29H24O16	[M+H]+	3-O-p-Coumaroyl-4,6-(S)-HHDP-β-D-glucose	Phenolic acids	-	782994±48706	1179356±172902	1121961±114733	1446222±20855	1345980±89203	1025461±43340	0.014
281	335.041	183.03	336.048	C15H12O9	[M-H]-	Digallic acid methyl ester	Phenolic acids	-	437543±84695	833245±151971	859052±167727	835550±155555	1036689±193452	95744±4055	0.09
282	153.019	109.029	154.027	C7H6O4	[M-H]-	3,4-Dihydroxybenzoic acid*	Phenolic acids	99-50-3	149816±23035	308076±34534	382606±34798	619784±43119	1063532±84186	684663±30629	0.01
283	461.109	169.014	462.116	C22H22O11	[M-H]-	1-O-Galloyl-6-O-Cinnamoyl-β-D-glucose	Phenolic acids	115746-69-5	583424±80576	712991±40700	871018±82946	953106±45808	922398±109041	1103544±50969	0.023
284	207.072	133.033	208.074	C11H12O4	[M-H]-	Ferulic acid methyl ester	Phenolic acids	2309-07-1	57647±6816	60485±2921	61244±8223	50513±4014	47591±5565	76757±3763	0.083
285	461.109	169.014	462.116	C22H22O11	[M-H]-	4-O-Galloyl-1-O-Cinnamoyl-β-D-glucose	Phenolic acids	-	709898±31808	862718±26310	993501±62801	1117605±122381	1110538±14483	1177817±59275	0.013
286	503.12	179.036	504.127	C24H24O12	[M-H]-	3,6-Di-O-caffeoyl glucose	Phenolic acids	-	43451±11069	81778±13942	65012±2550	43350±5573	64831±10834	135085±6938	0.019
287	353.088	191.056	354.095	C16H18O9	[M-H]-	4-O-Caffeoylquinic acid*	Phenolic acids	905-99-7	4337876±2028912	2170553±119502	2304068±341064	3274803±2947499	4295764±4240646	9818871±504798	0.779
288	495.076	343.068	496.085	C21H20O14	[M-H]-	3-O-Digalloyl quinic acid	Phenolic acids	-	3720824±333480	6336231±174367	7154478±197060	7931275±415261	9036371±652187	2520264±137043	0.009
289	167.036	108.025	168.042	C8H8O4	[M-H]-	Protocatechuic Acid Methyl Ester	Phenolic acids	2150-43-8	41841±11769	42045±7868	50411±4964	53900±12841	48925±2426	160937±9045	0.443
290	515.12	353.088	516.127	C25H24O12	[M-H]-	Isochlorogenic acid C*	Phenolic acids	57378-72-0	411842±48508	577624±125339	731976±88148	323911±65521	344470±94148	867338±50374	0.034
291	353.088	191.056	354.095	C16H18O9	[M-H]-	5-O-Caffeoylquinic acid*	Phenolic acids	906-33-2	5901381±197457	11742740±192984	10047605±580600	9129234±209060	10418019±444178	10075414±652764	0.012
292	311.077	163.04	312.084	C14H16O8	[M-H]-	1-O-Caffeoyl-β-D-xylose	Phenolic acids	-	255026±41066	671501±19518	611760±36278	728508±29224	687654±52566	486325±32118	0.019
293	315.072	153.017	316.079	C13H16O9	[M-H]-	Protocatechuic acid-4-O-glucoside*	Phenolic acids	-	496830±56647	2091253±133865	1860778±47679	1758695±40856	1720982±52432	1634379±110356	0.011
294	153.019	109.029	154.027	C7H6O4	[M-H]-	2,5-Dihydroxybenzoic acid; Gentisic Acid*	Phenolic acids	490-79-9	57646±19088	162451±12288	182585±17438	286133±42919	539338±42799	387762±26318	0.011
295	285.025	133.015	286.033	C11H10O9	[M-H]-	L-Malic acid-2-O-gallate	Phenolic acids	-	263358±66310	377565±11932	375523±122303	376099±106081	420984±147746	351101±24108	0.284
296	331.067	169.014	332.074	C13H16O10	[M-H]-	6-O-Galloyl-β-D-glucose*	Phenolic acids	13186-19-1	22116793±7535084	24520817±13112072	27861774±972719	22412122±14120333	24789430±15493145	34761416±2395622	0.705
297	183.03	124.017	184.037	C8H8O5	[M-H]-	3-O-Methylgallic Acid*	Phenolic acids	3934-84-7	787355±65451	1069790±77852	1020936±91495	1064869±18568	1086677±21528	1180867±81708	0.106
298	333.082	171.029	332.074	C13H16O10	[M+H]+	1-O-Galloyl-β-D-glucose	Phenolic acids	58511-73-2	1998706±70996	2033719±129936	2086577±86711	1910776±60147	2078594±129008	2060176±148970	0.141
299	301.094	139.046	302.1	C13H18O8	[M-H]-	4-O-Glucosyl-3,4-dihydroxybenzyl alcohol	Phenolic acids	-	20023±2048	196280±1912	174440±4802	175250±2270	166425±4203	190847±13818	0.012
300	315.072	153.019	316.079	C13H16O9	[M-H]-	1-O-Gentisoyl-β-D-glucoside*	Phenolic acids	23445-11-6	798882±34492	1177596±25957	1082491±83268	993516±8554	956105±48941	216986±15724	0.019
301	337.093	163.04	338.1	C16H18O8	[M-H]-	1-O-p-Coumaroylquinic acid	Phenolic acids	-	1112041±370556	1951367±937673	1628740±315814	2707948±2319926	2750601±1802033	6587159±491530	0.351
302	645.11	169.014	646.117	C29H26O17	[M-H]-	1-O-Caffeoyl-4,6-di-O-galloyl-β-D-glucose	Phenolic acids	-	122355±33553	157742±37470	158982±21369	196416±17700	184784±35978	164488±12383	0.099
303	183.035	124.021	184.037	C8H8O5	[M-H]-	Methyl gallate*	Phenolic acids	99-24-1	867293±96091	1070330±63426	1145098±99213	1242394±46537	1213211±112777	1319551±101866	0.042
304	483.077	169.014	484.085	C20H20O14	[M-H]-	1,4-Di-O-Galloyl-D-glucose	Phenolic acids	-	18027206±1564945	23571454±966169	24790218±2183090	21742379±4334988	20877800±5990465	13567641±1065007	0.281
305	345.083	139.04	346.09	C14H18O10	[M-H]-	1-O-(3,4-Dihydroxy-5-methoxy-benzoyl)-glucoside	Phenolic acids	-	55022±2662	91532±6579	83934±3365	106153±2768	114152±5835	114887±9384	0.01
306	341.089	179.034	342.095	C15H18O9	[M-H]-	6-O-Caffeoyl-D-glucose*	Phenolic acids	-	823605±39484	1067075±115071	1150541±93259	1195608±67925	1297836±39530	1067573±88058	0.02
307	321.097	147.044	320.09	C16H16O7	[M+H]+	Trans-5-O-(p-Coumaroyl)shikimate	Phenolic acids	-	1653808±491270	2203017±616614	2509108±359252	1876317±593952	2143630±236286	2083354±173540	0.301
308	151.041	107.052	152.047	C8H8O3	[M-H]-	3-Methoxybenzoic acid	Phenolic acids	586-38-9	32628±4264	58632±7323	75173±3929	100618±5546	162066±17988	154797±13525	0.009
309	521.202	131.049	520.194	C26H32O11	[M+H]+	Dehydrodiconiferyl alcohol-gamma'-O-glucoside	Phenolic acids	-	203495±24763	187837±31566	171102±27672	194870±4427	153619±26253	160176±14303	0.189
310	291.015	247.025	292.022	C13H8O8	[M-H]-	Brevifolin carboxylic acid	Phenolic acids	18490-95-4	1603062±273912	2809392±68214	3341577±388131	3402866±247950	3552224±551246	3688317±341493	0.028
311	355.103	121.029	356.111	C16H20O9	[M-H]-	Homovanilloylquinic acid	Phenolic acids	-	36005±26520	120772±8280	84707±18225	72481±16486	89049±17419	104215±9908	0.022
312	271.083	108.022	272.09	C12H16O7	[M-H]-	Arbutin	Phenolic acids	497-76-7	144060±5928	174232±6071	175835±30090	176576±75561	198191±36829	209138±19972	0.384
313	279.159	149.033	278.152	C16H22O4	[M+H]+	Butyl isobutyl phthalate*	Phenolic acids	17851-53-5	12311297±358355	12355840±470592	12257586±326747	12146867±336937	11306443±509085	11311836±1088566	0.131
314	355.104	193.05	356.111	C16H20O9	[M-H]-	Ferulic acid-4-O-glucoside	Phenolic acids	117405-51-3	91504±13022	192146±25271	151345±9938	153567±3679	184517±11822	164524±15962	0.016
315	369.118	177.055	368.111	C17H20O9	[M+H]+	3-O-Feruloylquinic acid	Phenolic acids	1899-29-2	119355±16792	182790±25916	141054±20928	140999±10910	134147±12166	132925±12953	0.098
316	633.073	275	634.081	C27H22O18	[M-H]-	1-O-Galloyl-4,6-hexahydroxydiphenoyl-D-glucose	Phenolic acids	126721-55-9	10441577±298308	12193882±727644	12099493±929727	11577197±523790	12045700±1063564	11315479±1138821	0.112
317	635.089	169.014	636.096	C27H24O18	[M-H]-	1,3,6-Tri-O-galloyl-β-D-glucose*	Phenolic acids	18483-17-5	30555±5802	29863±26820	50501±7270	60133±21206	58351±13335	54297±5684	0.093
318	177.056	145.028	178.063	C10H10O3	[M-H]-	p-Coumaric acid methyl ester	Phenolic acids	19367-38-5	287486±53683	431214±44492	768588±337918	371921±26901	392131±35967	604491±65284	0.047
319	183.065	153.02	184.074	C9H12O4	[M-H]-	4-Hydroxy-3,5-dimethoxybenzyl alcohol	Phenolic acids	530-56-3	305049±31898	405976±39041	454454±30771	430609±14809	464243±11977	476958±52973	0.024
320	369.118	177.055	368.111	C17H20O9	[M+H]+	1-O-Feruloylquinic acid	Phenolic acids	-	1222301±31799	1643519±37554	1420649±86758	3063417±2818447	1111054±103081	1719433±191099	0.019
321	165.092	149.061	166.099	C10H14O2	[M-H]-	1-(4-Methoxyphenyl)-1-propanol	Phenolic acids	5349-60-0	35428±11991	58683±2166	54328±4870	63438±11836	71498±8619	107047±12267	0.034
322	137.027	108.023	138.032	C7H6O3	[M-H]-	Salicylic acid	Phenolic acids	69-72-7	13958±7409	8078±1177	19184±20233	10953±4027	14600±5708	22338±2677	0.343
323	361.079	211.029	362.085	C14H18O11	[M-H]-	7-O-Galloyl-D-sedoheptulose	Phenolic acids	-	110842±8133	152110±11462	162177±5739	172633±9292	150677±7135	192561±23636	0.026
324	353.088	191.055	354.095	C16H18O9	[M-H]-	Chlorogenic acid*	Phenolic acids	327-97-9	4656900±211509	9315160±386508	7909887±669271	7307059±267660	8454121±479245	8266455±1030377	0.017
325	305.03	273.004	306.038	C14H10O8	[M-H]-	Methyl Brevifolincarboxylate	Phenolic acids	154702-76-8	139357±16715	241097±14924	247847±7662	259909±30606	276514±25500	537975±69310	0.037
326	460.146	117.9	461.153	C19H27NO12	[M-H]-	Anthranilate-1-O-Sophoroside	Phenolic acids	-	940498±126436	592492±80733	799189±47657	767900±50694	791487±179163	626791±83570	0.08
327	121.029	92.0268	122.037	C7H6O2	[M-H]-	4-Hydroxybenzaldehyde	Phenolic acids	123-08-0	67116±8845	75418±12522	91312±12110	108610±23118	157322±26189	229079±31372	0.023
328	361.092	163.039	360.084	C18H16O8	[M+H]+	Rosmarinic acid	Phenolic acids	537-15-5	247514±30543	265335±57059	252951±57494	225437±30236	260069±50136	264069±37136	0.736
329	341.088	179.036	342.095	C15H18O9	[M-H]-	1-O-Caffeoyl-β-D-glucose*	Phenolic acids	14364-08-0	486117±20056	751574±47761	742647±38326	730514±46054	768819±44673	665057±97858	0.086
330	151.04	107.05	152.047	C8H8O3	[M-H]-	4-Hydroxyphenylacetic acid	Phenolic acids	156-38-7	17426±2328	37966±22295	31465±6466	24762±3228	31480±5575	51527±7740	0.122
331	151.041	107.05	152.047	C8H8O3	[M-H]-	3-hydroxyphenylacetic acid	Phenolic acids	621-37-4	17426±2328	37966±22295	31465±6466	24762±3228	31480±5575	51527±7740	0.122
332	483.078	169.014	484.085	C20H20O14	[M-H]-	2,3-Di-O-Galloyl-β-D-Glucose	Phenolic acids	-	408038±18782	559588±19889	568119±17581	673114±32981	590908±111545	528941±79933	0.053
333	171.028	81.0332	170.022	C7H6O5	[M+H]+	2,4,6-Trihydroxybenzoic acid	Phenolic acids	83-30-7	3925329±128918	4275440±269125	4159592±363124	3709576±63589	4362516±524839	3947335±622371	0.127
334	375.107	137.1	374.1	C19H18O8	[M+H]+	Feruloyl syringic acid	Phenolic acids	-	49006±15191	51804±5185	47020±3497	44283±3340	40491±7300	52485±8667	0.327
335	335.077	179.03	336.084	C16H16O8	[M-H]-	5-O-Caffeoylshikimic acid	Phenolic acids	180981-12-8	32232±4737	27142±4527	33125±8540	25839±9291	30637±16448	42979±7576	0.736
336	327.145	165.093	328.152	C16H24O7	[M-H]-	3-Hydroxy-4-isopropylbenzylalcohol-3-O-glucoside	Phenolic acids	-	160790±43138	220585±32600	189060±25710	198758±23776	213976±21952	98642±17922	0.639
337	337.093	163.04	338.1	C16H18O8	[M-H]-	4-O-p-Coumaroylquinic acid	Phenolic acids	32451-86-8	497707±11608	835781±45934	711634±135967	509729±59386	548340±55662	290650±53930	0.025
338	151.04	136.017	152.047	C8H8O3	[M-H]-	Methyl 4-hydroxybenzoate*	Phenolic acids	99-76-3	8148±5717	5419±4051	17742±13552	21165±12895	32821±15572	6176±1151	0.094
339	151.04	136.017	152.047	C8H8O3	[M-H]-	Vanillin*	Phenolic acids	121-33-5	8148±5717	5419±4051	17742±13552	21165±12895	32821±15572	6176±1151	0.094
340	635.089	169.014	636.096	C27H24O18	[M-H]-	2,4,6-Tri-O-galloyl-D-glucose	Phenolic acids	108043-99-8	34909±4678	51068±11920	49995±9946	70804±14061	40589±6138	50948±10385	0.044
341	635.091	169.014	636.096	C27H24O18	[M-H]-	1,2,6-Tri-O-galloyl-β-D-glucose*	Phenolic acids	79886-49-0	34909±4678	51068±11920	49995±9946	70804±14061	40589±6138	50948±10385	0.044
342	613.119	147.044	612.111	C29H24O15	[M+H]+	1-O-Cinnamoyl-4,6-(S)-HHDP-β-D-glucose	Phenolic acids	-	19281±2808	25481±17002	73345±45371	55181±35313	54138±62385	24465±5087	0.363
343	635.089	169.014	636.096	C27H24O18	[M-H]-	1,2,3-Tri-O-galloyl-β-D-glucose	Phenolic acids	-	1010121±141595	872191±190073	1060494±21063	1424858±53576	1278568±146220	950545±200252	0.02
344	613.12	169.014	614.127	C29H26O15	[M-H]-	1,2-Di-O-galloyl-6-O-Cinnamoyl-β-D-glucose	Phenolic acids	-	75168±7773	102281±9232	94466±15280	104994±9412	127399±12804	41744±9010	0.041
345	371.098	249.063	372.106	C16H20O10	[M-H]-	Trihydroxycinnamoylquinic acid	Phenolic acids	-	7321±2396	13143±2506	12897±4268	15702±1094	10787±1264	24073±5681	0.056
346	271.118	91.0537	270.11	C13H18O6	[M+H]+	Phenyl-β-D-glucopyranoside	Phenolic acids	-	129005±4440	157305±11897	161987±6824	152331±12090	107104±9734	132039±31261	0.024
347	461.109	169.014	462.116	C22H22O11	[M-H]-	1-O-Galloyl-2-O-Cinnamoyl-β-D-glucose	Phenolic acids	56994-83-3	198267±55831	230358±2849	299413±30402	319010±34311	327507±64202	271948±65443	0.048
348	138.055	92.0495	137.048	C7H7NO2	[M+H]+	Anthranilic Acid	Phenolic acids	118-92-3	58496±16893	72923±11204	72716±22776	109057±26869	125622±56332	74756±21815	0.119
349	165.019	121.029	166.027	C8H6O4	[M-H]-	Terephthalic acid	Phenolic acids	100-21-0	83198±13271	114107±24552	163890±23874	184753±16561	164233±32648	55703±16951	0.027
350	167.037	123.045	168.042	C8H8O4	[M-H]-	2',4',6'-Trihydroxyacetophenone	Phenolic acids	480-66-0	12165±2486	11501±6910	12419±1808	16960±3783	21202±1990	20975±6515	0.145
351	515.12	353.088	516.127	C25H24O12	[M-H]-	Isochlorogenic acid A*	Phenolic acids	2450-53-5	548069±207555	283812±56548	389917±250204	235828±133486	452127±15949	928472±303669	0.109
352	337.093	191.056	338.1	C16H18O8	[M-H]-	3-O-p-Coumaroylquinic acid*	Phenolic acids	87099-71-6	1448788±138885	3170297±203270	2724760±156971	2333247±78775	2484352±257925	6217126±2120625	0.016
353	337.093	191.056	338.1	C16H18O8	[M-H]-	5-O-p-Coumaroylquinic acid*	Phenolic acids	1899-30-5	1448788±138885	3170297±203270	2724760±156971	2333247±78775	2484352±257925	6217126±2120625	0.016
354	355.104	193.049	356.111	C16H20O9	[M-H]-	6-O-Feruloyl-β-D-glucose	Phenolic acids	137887-25-3	42905±13788	30450±2477	74037±23630	89278±8071	86027±34034	72669±25983	0.042
355	327.11	165.05	328.116	C15H20O8	[M-H]-	Demethyl coniferin	Phenolic acids	-	1341086±408038	2371527±922386	2226137±159827	1753564±281332	1573390±169501	1311233±469877	0.255
356	163.045	119.054	164.047	C9H8O3	[M-H]-	3-Hydroxycinnamic Acid*	Phenolic acids	14755-02-3	94786±7234	152960±16462	175198±31931	190879±30151	217837±29465	304103±111063	0.038
357	391.284	149.023	390.277	C24H38O4	[M+H]+	Bis(2-ethylhexyl)phthalate*	Phenolic acids	117-81-7	3892649±1216878	3517261±288850	3976664±956212	3379065±623431	3045941±471792	1728088±664246	0.645
358	325.093	145.03	326.1	C15H18O8	[M-H]-	1-O-p-Coumaroyl-β-D-glucose	Phenolic acids	7139-64-2	150279±24767	564580±62962	477350±45258	390369±19283	445320±31782	577453±244463	0.014
359	167.035	123.045	168.042	C8H8O4	[M-H]-	Homogentisic acid	Phenolic acids	451-13-8	459743±13384	331370±104035	377893±98898	436885±39925	455650±92656	361592±153385	0.384
360	515.12	353.088	516.127	C25H24O12	[M-H]-	Isochlorogenic acid B*	Phenolic acids	14534-61-3	113565±6791	173290±12403	234201±117610	107881±9249	147511±18203	412549±188992	0.015
361	513.125	191.1	514.132	C22H26O14	[M-H]-	p-Coumaroylquinic acid-4'-O-glucuronide	Phenolic acids	-	49501851±1044965	27858692±12164276	36798121±17155161	31132340±17235742	46946817±17238566	30422909±14392505	0.228
362	577.135	425.089	578.142	C30H26O12	[M-H]-	Procyanidin B1	Tannins	20315-25-7	261759±18231	319545±20288	324234±55984	415617±41291	381227±9594	420668±3528	0.018
363	717.145	579.113	716.138	C36H28O16	[M+H]+	Theaflavin-3'-Gallate*	Tannins	28543-07-9	179106±8889	127275±11536	157137±23650	106265±8129	142586±8164	118110±2706	0.025
364	577.135	407.079	578.142	C30H26O12	[M-H]-	Procyanidin B2	Tannins	29106-49-8	8843074±1416036	10706419±823374	12092322±886259	12523835±1017598	12607921±539464	14287764±391182	0.031
365	865.198	713.155	866.206	C45H38O18	[M-H]-	Procyanidin C2	Tannins	37064-31-6	255467±77799	404161±33285	436521±21010	474507±15399	434977±17652	525220±26761	0.02
366	865.198	577.138	866.206	C45H38O18	[M-H]-	Procyanidin C1	Tannins	37064-30-5	297581±22816	401156±68281	446790±47646	461139±71839	466502±27471	524637±29680	0.077
367	577.135	407.076	578.142	C30H26O12	[M-H]-	Procyanidin B4	Tannins	29106-51-2	112871±18639	120456±18587	147357±22569	216472±26734	187436±17624	225431±17493	0.021
368	869.156	139.038	868.149	C43H32O20	[M+H]+	Theaflavin-3,3'-di-O-gallate	Tannins	30462-35-2	95833±27707	114964±9167	156633±11546	94820±24031	126967±15794	136656±15116	0.045
369	565.134	139.039	564.127	C29H24O12	[M+H]+	Theaflavin	Tannins	4670-05-7	246185±20062	265396±12973	323358±57171	288650±21876	323899±13233	261014±38629	0.029
370	577.135	407.076	578.142	C30H26O12	[M-H]-	Procyanidin B3	Tannins	23567-23-9	344943±132118	528781±289311	328207±122083	533789±40536	1349315±342117	1633344±506467	0.048
371	315.015	299.992	316.022	C15H8O8	[M-H]-	3-O-Methylellagic acid	Tannins	-	1678732±195554	1988097±110453	1663228±161982	1065894±20127	1275142±26052	1973631±19980	0.012
372	345.059	313.033	344.053	C17H12O8	[M+H]+	3,3',4-O-Trimethylellagic acid	Tannins	1617-49-8	119542±1867	106111±4974	88326±8479	50503±3212	51165±2990	90136±1691	0.012
373	463.052	300.99	464.059	C20H16O13	[M-H]-	Ellagic acid-4-O-glucoside	Tannins	-	101106±12787	122057±23295	110447±16545	89939±6850	97815±9025	132301±4355	0.287
374	851.146	425.087	852.154	C43H32O19	[M-H]-	Theaflavate B	Tannins	152542-70-6	322631±35543	385607±20670	430558±26129	454358±26234	443986±38993	543696±18376	0.031
375	399.072	233.048	400.079	C20H16O9	[M-H]-	Theaflagallin	Tannins	102208-15-1	34159±14102	2650±1680	8122±1493	7144±1816	10307±3346	38589±2484	0.023
376	955.106	633.076	956.113	C41H32O27	[M-H]-	Chebulinic acid	Tannins	18942-26-2	238786±26770	258698±43074	296325±85042	313619±55057	325695±64994	269340±17466	0.277
377	467.083	169.014	468.09	C20H20O13	[M-H]-	Ginnalin A	Tannins	-	32486±9648	38258±4718	51484±4821	39099±6906	50575±2094	47290±4755	0.029
378	635.086	277.036	634.081	C27H22O18	[M+H]+	Strictinin	Tannins	517-46-4	548577±22432	567657±31705	536941±69766	554360±42697	508365±57819	494322±55332	0.592
379	300.999	185.023	302.006	C14H6O8	[M-H]-	Ellagic acid	Tannins	476-66-4	279475±56679	325766±58642	269329±54142	315497±16494	322789±60326	510748±103729	0.609
380	633.074	301.001	634.081	C27H22O18	[M-H]-	Corilagin	Tannins	23094-69-1	222696±32237	273686±19135	301964±5441	267641±7154	275225±35609	218144±48326	0.06
381	243.097	127.05	242.09	C10H14N2O5	[M+H]+	Thymidine	Nucleotides and their derivatives	50-89-5	548933±7103	1139920±34603	999639±55155	1020046±30395	915772±45046	879954±6390	0.014
382	243.062	153.031	244.07	C9H12N2O6	[M-H]-	β-Pseudouridine	Nucleotides and their derivatives	1445-07-4	57856±15097	69298±28194	80875±30714	51681±16429	61862±21525	118441±1621	0.633
383	112.05	70.0284	111.043	C4H5N3O	[M+H]+	Isocytosine	Nucleotides and their derivatives	108-53-2	3419636±65749	1558402±107347	1611876±195019	932336±60926	1037993±113961	2105183±37420	0.015
384	312.13	180.088	311.123	C12H17N5O5	[M+H]+	N6-(2-Hydroxyethyl)adenosine*	Nucleotides and their derivatives	4338-48-1	2698261±223019	3815241±433869	3180422±110915	2477364±220250	2379515±82086	2922243±101348	0.016
385	312.13	180.088	311.123	C12H17N5O5	[M+H]+	2-(Dimethylamino)guanosine*	Nucleotides and their derivatives	2140-67-2	2698261±223019	3815241±433869	3180422±110915	2477364±220250	2379515±82086	2922243±101348	0.016
386	384.115	252.073	383.108	C14H17N5O8	[M+H]+	Succinyladenosine	Nucleotides and their derivatives	4542-23-8	3232860±410996	2962895±93018	2793825±223762	2697600±213242	2822714±207366	2959419±103827	0.291
387	166.072	149.046	165.065	C6H7N5O	[M+H]+	7-Methylguanine	Nucleotides and their derivatives	578-76-7	169348±11388	142399±41815	99675±65717	97938±65928	110770±60908	135465±4801	0.182
388	402.995	158.925	404.002	C9H14N2O12P2	[M-H]-	Uridine 5'-diphosphate	Nucleotides and their derivatives	27821-45-0	94888±2651	141646±10505	138669±11304	165162±14643	183276±7116	196862±7825	0.019
389	252.109	136.062	251.102	C10H13N5O3	[M+H]+	2'-Deoxyadenosine	Nucleotides and their derivatives	958-09-8	169210±17370	372933±36275	331038±47428	420598±35648	409747±44909	332757±14301	0.038
390	284.099	152.059	283.092	C10H13N5O5	[M+H]+	Guanosine	Nucleotides and their derivatives	118-00-3	10895914±770881	16412497±600772	10954737±6258191	6787519±2425190	9851645±510167	12793092±585702	0.053
391	268.104	152.057	267.097	C10H13N5O4	[M+H]+	2'-Deoxyguanosine	Nucleotides and their derivatives	961-07-9	611952±35189	806591±56850	729725±55294	726788±86865	755987±37505	708001±35753	0.083
392	565.048	323.029	566.055	C15H24N2O17P2	[M-H]-	Uridine 5'-diphospho-D-glucose	Nucleotides and their derivatives	133-89-1	4527410±785158	4916987±488994	4702314±64144	5257752±490940	4120487±207114	3242721±178931	0.113
393	268.106	136.062	267.097	C10H13N5O4	[M+H]+	Vidarabine	Nucleotides and their derivatives	5536-17-4	8522490±139309	49408881±3903707	52419407±2170746	66326728±2544960	59785098±2766630	45296379±2817753	0.011
394	323.029	211.001	324.036	C9H13N2O9P	[M-H]-	Uridine 5'-monophosphate	Nucleotides and their derivatives	58-97-9	94685±34549	204733±31246	213241±12798	263034±63439	283543±16537	177516±11124	0.023
395	664.116	136.062	663.109	C21H27N7O14P2	[M+H]+	Nicotinic acid adenine dinucleotide	Nucleotides and their derivatives	53-84-9	998219±214610	886745±50497	830547±121121	834670±81310	820174±112383	839030±53783	0.586
396	348.07	136.062	347.063	C10H14N5O7P	[M+H]+	Adenosine 5'-monophosphate	Nucleotides and their derivatives	61-19-8	1090343±72656	1825289±218875	1423843±157050	1213190±149601	1484740±193670	1306780±83775	0.031
397	535.037	323.026	536.044	C14H22N2O16P2	[M-H]-	Uridine-5'-Diphosphate-D-Xylose	Nucleotides and their derivatives	3616-06-6	1026435±104076	1163976±48407	1244525±41862	1174996±97219	1001344±90836	795516±52700	0.073
398	742.068	620.02	743.076	C21H28N7O17P3	[M-H]-	NADP	Nucleotides and their derivatives	53-59-8	1169997±138520	484002±43499	477321±78937	436447±48862	412988±13651	579289±38748	0.045
399	283.068	151.026	284.076	C10H12N4O6	[M-H]-	Xanthosine	Nucleotides and their derivatives	146-80-5	64023±52916	236835±15579	191878±18683	196393±7264	190092±7836	276361±18567	0.024
400	268.104	136.062	267.097	C10H13N5O4	[M+H]+	Adenosine	Nucleotides and their derivatives	58-61-7	8654650±75152	50645454±1325030	52327191±4939573	67516995±3625041	59512092±6568660	44961878±3202279	0.018
401	267.074	135.031	268.081	C10H12N4O5	[M-H]-	9-(Arabinosyl)hypoxanthine	Nucleotides and their derivatives	7013-16-3	24338±16846	62886±6276	55168±6876	54981±7680	58578±2693	63124±4501	0.07
402	400.146	136.062	399.139	C15H21N5O8	[M+H]+	Ribosyladenosine	Nucleotides and their derivatives	-	277962±10518	272476±66209	295429±17745	214241±50060	273128±17853	276782±22358	0.209
403	167.056	150.03	166.049	C6H6N4O2	[M+H]+	7-Methylxanthine	Nucleotides and their derivatives	552-62-5	674682±17632	985183±127206	928731±82236	1016881±58259	1052896±89814	851571±72404	0.083
404	243.062	110.025	244.07	C9H12N2O6	[M-H]-	Uridine	Nucleotides and their derivatives	58-96-8	50332±21974	96485±18437	68672±45813	106998±18456	84283±5066	99701±8580	0.145
405	344.04	150.043	345.047	C10H12N5O7P	[M-H]-	Guanosine 3',5'-cyclic monophosphate	Nucleotides and their derivatives	7665-99-8	42438±2492	1764513±72100	1754928±189907	1886940±78388	1919369±124665	1425673±132697	0.065
406	579.027	402.995	580.034	C15H22N2O18P2	[M-H]-	Uridine-5'-diphosphoglucuronic acid	Nucleotides and their derivatives	-	176794±26589	242206±12775	254098±27535	229377±17182	185861±4145	138096±13104	0.029
407	269.088	137.046	268.081	C10H12N4O5	[M+H]+	Inosine	Nucleotides and their derivatives	58-63-9	143655±5959	133967±13651	132454±14457	156866±8807	160481±35511	145580±14034	0.182
408	152.057	135.03	151.049	C5H5N5O	[M+H]+	Guanine	Nucleotides and their derivatives	73-40-5	73316±3050	84944±2497	80525±28516	71351±3903	67641±21595	79821±7821	0.569
409	426.022	158.925	427.029	C10H15N5O10P2	[M-H]-	Adenosine 5'-diphosphate	Nucleotides and their derivatives	58-64-0	582869±49802	911295±112218	986310±101686	984268±177420	1179120±180126	883743±90588	0.05
410	505.994	158.926	506.996	C10H16N5O13P3	[M-H]-	ATP; Adenosine 5'-Triphosphate	Nucleotides and their derivatives	56-65-5	166542±48047	150688±19148	154465±10551	172217±17666	180647±20865	138569±14325	0.424
411	282.12	136.06	281.112	C11H15N5O4	[M+H]+	2'-O-Methyladenosine	Nucleotides and their derivatives	2140-79-6	1092409±131610	1660802±70148	1624936±99745	1308045±73852	1157901±41710	1462773±167674	0.019
412	167.056	124.05	166.049	C6H6N4O2	[M+H]+	3-Methylxanthine	Nucleotides and their derivatives	1076-22-8	3420088±194533	4868639±700723	4569325±312496	5020621±211486	5264025±346899	4426749±527935	0.057
413	606.076	384.985	607.082	C17H27N3O17P2	[M-H]-	Uridine 5'-diphospho-N-acetylglucosamine	Nucleotides and their derivatives	528-04-1	216504±22325	235013±10749	250130±28895	316579±33503	312599±12276	176924±22641	0.033
414	244.093	112.05	243.085	C9H13N3O5	[M+H]+	Cytidine	Nucleotides and their derivatives	65-46-3	522651±16219	836275±206910	704255±249398	605734±64892	768497±121955	709243±104137	0.151
415	455.097	96.9685	456.105	C17H21N4O9P	[M-H]-	Flavin Single Nucleotide(FMN)	Nucleotides and their derivatives	6184-17-4	32303±11427	55070±14597	52107±1454	55145±11908	52123±11351	66993±10013	0.171
416	333.06	137.05	332.052	C10H13N4O7P	[M+H]+	2'-Deoxyinosine-5'-monophosphate	Nucleotides and their derivatives	3393-18-8	4162803±158439	2150747±178164	2353775±174543	2597376±143944	3138454±331011	3329059±542757	0.012
417	298.097	136.062	297.09	C11H15N5O3S	[M+H]+	5'-Deoxy-5'-(methylthio)adenosine	Nucleotides and their derivatives	2457-80-9	899655±36017	1659484±135445	1414884±202560	1435892±82611	1697531±106965	1361152±222666	0.025
418	349.054	137.046	348.047	C10H13N4O8P	[M+H]+	Inosine 5'-monophosphate	Nucleotides and their derivatives	131-99-7	17867±6314	36346±13717	41735±3927	37675±7162	46596±50800	23066±3999	0.277
419	245.072	113.032	244.07	C9H12N2O6	[M+H]+	1-beta-D-Arabinofuranosyluracil	Nucleotides and their derivatives	3083-77-0	48303±32668	54741±12745	63443±18779	57633±11401	59271±23283	63074±14552	0.9
420	136.062	119.035	135.054	C5H5N5	[M+H]+	Adenine	Nucleotides and their derivatives	73-24-5	2806213±1262130	619892±391102	916002±269526	782331±58264	633427±48615	951773±268254	0.066
421	328.045	134.047	329.053	C10H12N5O6P	[M-H]-	Cyclic 3',5'-Adenylic acid	Nucleotides and their derivatives	60-92-4	11110±5425	134797±36076	115864±34898	112483±51450	147256±79821	136749±42504	0.102
422	151.026	108.02	152.033	C5H4N4O2	[M-H]-	Xanthine	Nucleotides and their derivatives	69-89-6	10500±2000	14991±3666	16007±1872	16204±5222	12444±5071	19323±8542	0.264
423	104.107	60.0808	104.107	C5H14NO+	[M]+	Choline	Alkaloids	62-49-7	92277869±3247042	52344919±1979011	48388179±5292253	53845031±1351129	52239020±3765376	60935458±781289	0.063
424	146.165	72.0808	145.158	C7H19N3	[M+H]+	Spermidine	Alkaloids	124-20-9	57879±9038	81288±23889	76119±13801	53165±15826	91497±2886	81461±1639	0.089
425	181.073	138.067	180.065	C7H8N4O2	[M+H]+	Theobromine	Alkaloids	83-67-0	50729009±1548181	63693818±2008525	61671566±4522684	62314934±4110233	64488325±872236	61123699±1456488	0.112
426	168.066	105.034	167.058	C8H9NO3	[M+H]+	4,5,6-Trihydroxy-2-cyclohexen-1-ylideneacetonitrile	Alkaloids	-	865916±39019	1290003±60206	1069077±54932	1143701±91943	1290600±22413	1039095±24791	0.018
427	120.081	103.055	119.073	C8H9N	[M+H]+	N-Benzylmethylene isomethylamine	Alkaloids	-	16161540±658908	24812876±1021800	20765602±1023386	22165794±994904	24653471±394714	20161583±692939	0.014
428	142.097	124.087	141.09	C6H11N3O	[M+H]+	Histidinol	Alkaloids	501-28-0	17276461±502482	18643965±898372	18665160±260096	15877234±4311566	18049552±1260095	18551581±705162	0.339
429	179.058	164.034	180.065	C7H8N4O2	[M-H]-	Theophylline	Alkaloids	58-55-9	4551±4735	12342±5064	9612±1425	17402±2533	16763±5686	59605±2441	0.059
430	195.088	83.0604	194.08	C8H10N4O2	[M+H]+	Caffeine	Alkaloids	58-08-2	9141837±305903	9359037±545909	8864859±555229	8746187±760672	8602993±509279	8912917±399935	0.504
431	188.071	118.06	187.063	C11H9O2N	[M+H]+	3-amino-2-naphthoic acid	Alkaloids	-	36530769±1023313	39535600±1012042	37825459±2353133	32338723±953950	33033475±2071052	32297136±1515729	0.02
432	127.052	81.0449	126.043	C5H6N2O2	[M+H]+	Imidazol-1-yl-acetic acid*	Alkaloids	22884-10-2	166712±20176	128373±9845	136403±33647	171636±17995	184529±26395	153899±9579	0.063
433	184.073	125.001	184.073	C5H15NO4P+	[M]+	O-Phosphocholine	Alkaloids	107-73-3	1365360±351459	740118±585352	729993±632300	1201185±218893	846606±67005	982225±65255	0.178
434	474.173	327.12	473.166	C20H23N7O7	[M+H]+	10-Formyltetrahydrofolic Acid	Alkaloids	2800-34-2	1884165±232772	2062957±91712	1838854±144058	2374739±71614	2217470±315912	2181908±161823	0.071
435	148.076	103.055	147.068	C9H9NO	[M+H]+	(E)-Cinnamamide	Alkaloids	22031-64-7	32269±6286	45823±12374	45985±12748	40953±11253	46284±4859	42528±3694	0.335
436	203.223	84.081	202.216	C10H26N4	[M+H]+	Spermine	Alkaloids	71-44-3	6823981±412373	7293021±156827	8433690±698686	6690939±295455	7120108±687315	7744197±963901	0.04
437	277.123	146.081	278.13	C11H22N2O4S	[M-H]-	Pantetheine	Alkaloids	496-65-1	30719±1635	59734±21524	47543±3548	42926±3682	17522±2034	13594±1709	0.022
438	145.133	86.0961	144.126	C7H16N2O	[M+H]+	N-Acetylcadaverine	Alkaloids	32343-73-0	293787±37233	443241±78756	478074±116719	448035±148101	381867±144734	504978±70594	0.291
439	267.077	249.066	266.069	C15H10N2O3	[M+H]+	3-(2'-Hydroxyl-phenyl)-4-(3H)-quinazolone	Alkaloids	-	19303±3859	24708±3631	24857±6523	25163±10812	24216±3152	25023±4064	0.697
440	326.305	62.0601	325.298	C20H39NO2	[M+H]+	N-Oleoylethanolamine	Alkaloids	111-58-0	244679±50121	37766±9657	35217±6387	33296±6850	37830±928	144549±30143	0.101
441	136.071	91.0544	135.068	C8H9NO	[M+H]+	N-benzylformamide	Alkaloids	6343-54-0	1164335±119472	714097±65957	682919±37162	730963±118748	757726±60648	761755±176334	0.098
442	127.047	81.044	126.043	C5H6N2O2	[M+H]+	Imidazole-4-Acetic Acid*	Alkaloids	645-65-8	164993±4320	134673±12249	150854±26938	192311±34603	177451±17994	155990±38393	0.077
443	103.123	86.0964	102.116	C5H14N2	[M+H]+	Cadaverine	Alkaloids	462-94-2	19590±9279	21587±4111	20044±1351	24970±2444	19420±6008	22773±5652	0.575
444	284.295	102.091	283.288	C18H37NO	[M+H]+	Stearamide	Alkaloids	124-26-5	26932±6117	18882±1703	16349±3689	11252±1162	11590±762	17158±5348	0.023
445	243.088	145.076	242.08	C12H10N4O2	[M+H]+	Lumichrome	Alkaloids	1086-80-2	26678±8956	41205±6640	47172±5775	36819±4886	40142±7559	37473±13483	0.109
446	118.065	91.0542	117.058	C8H7N	[M+H]+	Indole	Alkaloids	120-72-9	327559±17251	364478±11694	334923±28049	307850±23669	303763±25238	311062±13182	0.097
447	188.071	118.065	187.063	C11H9NO2	[M+H]+	3-Indoleacrylic acid	Alkaloids	1204-06-4	32938661±68485	37138941±167102	35344556±2036585	30831780±1813932	30333147±1535599	32314496±1453654	0.021
448	206.081	145.052	205.074	C11H11NO3	[M+H]+	Methoxyindoleacetic acid	Alkaloids	3471-31-6	4149344±207926	4501096±140768	4231629±364526	3872303±333163	3544425±152224	3908164±182563	0.033
449	205.097	146.061	204.09	C11H12N2O2	[M+H]+	1-Methoxy-indole-3-acetamide	Alkaloids	-	2823903±59962	3113518±213981	2995928±109231	2424509±50358	2477532±130738	2639884±173222	0.019
450	485.192	323.139	484.185	C25H28N2O8	[M+H]+	N-(p-Coumaroyl)serotonin Glucoside	Alkaloids	76423-56-8	58176±927	60644±18757	69958±4532	70971±4259	58641±4275	59810±4302	0.132
451	190.086	118.065	189.079	C11H11NO2	[M+H]+	3-Indolepropionic acid	Alkaloids	830-96-6	36770±6015	47879±13096	45936±7632	39662±11891	32925±1466	31743±2547	0.212
452	161.107	144.081	160.1	C10H12N2	[M+H]+	Tryptamine	Alkaloids	61-54-1	103540±19447	164927±17320	120753±25186	125385±27741	126570±9385	116574±11273	0.139
453	219.113	160.076	218.106	C12H14N2O2	[M+H]+	N-Acetyl-5-hydroxytryptamine	Alkaloids	1210-83-9	560213±47128	372342±50856	309971±92045	321079±55005	243449±138554	366448±40491	0.056
454	134.059	106.067	133.053	C8H7NO	[M+H]+	Oxindole	Alkaloids	59-48-3	52275±11235	148419±40361	73269±8306	37301±17123	52038±14677	68672±11994	0.031
455	157.076	130.065	156.069	C10H8N2	[M+H]+	3-Indoleacetonitrile	Alkaloids	771-51-7	117671±26072	198514±12506	299973±11396	309289±8185	329635±10740	303224±113375	0.011
456	144.065	84.0449	143.058	C6H9NO3	[M+H]+	Methyl L-pyroglutamate	Alkaloids	4931-66-2	5634223±221442	3642405±508356	4470163±581000	2986856±214282	3441944±382266	4775659±158022	0.02
457	138.052	78.0328	137.048	C7H7NO2	[M+H]+	Nicotinic Acid Methyl Ester(Methyl Nicotinate)	Alkaloids	93-60-7	2075494±64894	1574290±141568	1343267±25111	1484911±133529	1397059±67308	1498655±63355	0.034
458	558.281	207.065	557.274	C29H39N3O8	[M+H]+	N1,N8-Bis(sinapoyl)spermidine	Alkaloids	-	3523233±494516	3395915±646739	3867200±146917	3783891±269758	3417917±413011	3336482±157147	0.509
459	277.166	147.044	276.159	C14H20N4O2	[M+H]+	p-Coumaroylagmatine	Alkaloids	7295-86-5	903329±15049	730889±14217	929843±32428	902799±62200	887190±42362	878915±43031	0.087
460	307.176	177.055	306.169	C15H22N4O3	[M+H]+	N-Feruloylagmatine	Alkaloids	-	10394743±448569	13841968±140569	13315218±1007779	11997351±1427978	12532603±1206819	11737628±1111168	0.045
461	265.155	177.062	264.147	C14H20N2O3	[M+H]+	N-Feruloylputrescine	Alkaloids	501-13-3	573970±25146	611045±35341	522370±39400	262066±17831	275911±21236	468789±58264	0.016
462	293.161	163.04	292.154	C14H20N4O3	[M+H]+	Caffeoylagmatine	Alkaloids	-	171065±16726	82733±14274	122000±11482	85996±11107	93744±14187	117790±20073	0.029
463	309.181	207.065	308.174	C16H24N2O4	[M+H]+	N-Sinapoylcadaverine	Alkaloids	-	41936±16320	64448±6462	53957±9815	47940±4526	50636±6231	50762±11101	0.121
464	182.081	91.0548	181.074	C9H11NO3	[M+H]+	N-(2-Hydroxy-4-methoxyphenyl)acetamide	Alkaloids	58469-06-0	20813934±2730359	17847524±1216276	11624376±2522222	12005860±1145594	15243516±984328	14028333±2404998	0.015
465	130.065	103.055	129.058	C9H7N	[M+H]+	Isoquinoline	Alkaloids	119-65-3	259909±9718	268481±22252	268671±11824	247446±55673	273456±23286	291113±52564	0.915
466	166.019	79.9572	167.022	C7H5NO4	[M-H]-	Quinolinic Acid	Alkaloids	89-00-9	24961±2133	33270±7004	38230±8346	38968±11430	47447±10795	62254±12212	0.089
467	86.0964	69.0698	85.0891	C5H11N	[M+H]+	Piperidine	Alkaloids	110-89-4	4761321±336818	4390136±523795	3449473±420497	2548493±155430	3032892±179184	3448726±451355	0.015
468	203.118	132.085	202.111	C12H14N2O	[M+H]+	L-Praziquanamine	Alkaloids	99746-73-3	45216±9685	44371±6077	61792±3858	54148±3671	56721±12677	78363±19478	0.109
469	122.096	105.071	121.089	C8H11N	[M+H]+	2-Phenylethylamine	Alkaloids	156-28-5	356837±12152	246906±91042	289613±18427	213951±94668	350702±40692	338596±17780	0.034
470	94.0651	53.0383	93.0578	C6H7N	[M+H]+	2-Picoline; 2-Methylpyridine	Alkaloids	109-06-8	194747±10564	206621±15693	168962±75736	182990±23363	194376±12769	194086±14607	0.779
471	118.015	74.0237	119.022	C3H5NO4	[M-H]-	Aminomalonic acid	Organic acids	1068-84-4	486172±133486	384838±12488	262492±23041	267694±39663	447101±118871	441040±1893	0.034
472	191.02	111.009	192.027	C6H8O7	[M-H]-	Citric Acid	Organic acids	77-92-9	9539144±1270629	13079767±1201421	12028710±563113	12938000±338984	14352107±987048	12393247±136095	0.021
473	175.061	115.044	176.069	C7H12O5	[M-H]-	2-Isopropylmalic Acid	Organic acids	49601-06-1	3663742±344731	7101740±586538	6747963±403657	7045133±265123	7358923±694381	8227643±106029	0.102
474	133.048	71.0136	134.058	C5H10O4	[M-H]-	2,3-Dihydroxy-3-Methylbutanoic Acid	Organic acids	1756-18-9	3304063±436151	4281444±210773	4512597±400868	4776154±248968	4865143±55676	4516516±74347	0.034
475	153.127	83.0474	152.12	C10H16O	[M+H]+	cis-Citral	Organic acids	5392-40-5	52464±2230	60069±1064	57700±946	47132±7235	59124±12824	50225±912	0.094
476	104.071	58.0651	103.063	C4H9NO2	[M+H]+	2-Aminoisobutyric acid*	Organic acids	62-57-7	12538156±566448	5829115±480109	5435801±474541	6641611±99597	5775466±227383	7464943±153204	0.021
477	103.004	59.0139	104.011	C3H4O4	[M-H]-	Malonic acid	Organic acids	141-82-2	378777±27187	516459±12476	558944±21100	497064±21013	501058±24664	423439±9007	0.021
478	271.228	225.22	272.235	C16H32O3	[M-H]-	2-Hydroxyhexadecanoic acid	Organic acids	764-67-0	610641±8319	548459±23548	651537±46341	574317±14807	612994±32621	677198±14542	0.026
479	191.056	85.0296	192.063	C7H12O6	[M-H]-	Quinic Acid	Organic acids	77-95-2	16172033±5584272	9614721±4548048	7930054±295583	14402234±10742077	9775829±3158530	32481261±749618	0.24
480	124.007	79.9574	125.015	C2H7NO3S	[M-H]-	2-Aminoethanesulfonic acid	Organic acids	107-35-7	10759±1420	11817±470	18049±7027	11404±4326	18463±6959	23221±537	0.173
481	133.014	71.0145	134.022	C4H6O5	[M-H]-	L-Malic acid*	Organic acids	97-67-6	20184899±2633086	23030189±2404964	22551592±987407	24207415±1528713	25497190±1472802	27451910±694342	0.141
482	132.03	88.0403	133.037	C4H7NO4	[M-H]-	Iminodiacetic acid*	Organic acids	142-73-4	712171±43905	871173±113515	1024324±42536	1084866±139687	1143952±13196	1244036±34050	0.025
483	104.071	69.0348	103.063	C4H9NO2	[M+H]+	γ-Aminobutyric acid	Organic acids	56-12-2	1302064±93052	1006701±49071	1207606±85140	1598026±93387	1899964±16949	1392562±39732	0.01
484	94.9808	79.9609	95.9881	CH4O3S	[M-H]-	Methanesulfonic acid	Organic acids	75-75-2	42599±7104	37377±9397	68357±4718	82331±7237	79860±13933	122279±3563	0.023
485	187.098	125.097	188.105	C9H16O4	[M-H]-	Azelaic acid	Organic acids	123-99-9	359917±55655	371800±26164	422339±13446	390745±33347	461804±5227	622388±19341	0.047
486	171.03	109.029	172.037	C7H8O5	[M-H]-	3-Dehydroshikimic acid	Organic acids	2922-42-1	329180±36000	321707±12186	388846±11439	315692±10622	261889±37843	388375±12297	0.025
487	173.046	93.0346	174.053	C7H10O5	[M-H]-	Shikimic acid	Organic acids	138-59-0	528525±184236	628188±126665	581324±58396	660982±91526	796023±64802	652746±21594	0.131
488	191.02	111.009	192.027	C6H8O7	[M-H]-	Isocitric Acid	Organic acids	320-77-4	7144745±240262	11018924±1305709	11187527±2588549	11880901±825821	12464095±1517529	8295001±292476	0.106
489	204.031	160.039	205.037	C10H7NO4	[M-H]-	4,8-Dihydroxyquinoline-2-carboxylic acid	Organic acids	59-00-7	523528±77803	913690±55928	906018±27149	885331±60288	956062±46898	942299±33598	0.088
490	146.092	87.0441	145.085	C5H11N3O2	[M+H]+	4-Guanidinobutyric acid	Organic acids	463-00-3	24475832±1714734	33748244±4371225	31878521±3854842	27576865±2837212	33286760±1916708	27161980±1074301	0.04
491	191.103	128.071	190.095	C7H14N2O4	[M+H]+	2,6-Diaminooimelic acid	Organic acids	583-93-7	599261±306665	735410±188282	638213±75834	821841±90870	726719±117925	914859±37330	0.493
492	175.061	115.04	176.069	C7H12O5	[M-H]-	2-Propylmalic Acid*	Organic acids	-	3953432±263139	7606968±537473	7363657±1061457	7493670±158088	8050202±173757	8843655±392867	0.064
493	175.061	115.04	176.069	C7H12O5	[M-H]-	3-Isopropylmalic Acid*	Organic acids	921-28-8	3953432±263139	7606968±537473	7363657±1061457	7493670±158088	8050202±173757	8843655±392867	0.064
494	105.019	105.019	106.027	C3H6O4	[M-H]-	DL-Glyceric Acid	Organic acids	473-81-4	364557±94113	412951±148781	437922±18874	401310±13250	325039±120837	758693±34151	0.298
495	165.091	91.0546	164.084	C10H12O2	[M+H]+	4-Phenylbutyric acid	Organic acids	1821-12-1	895443±35201	1051353±12384	943809±79042	744549±70611	846735±82920	939058±42837	0.028
496	129.019	85.0298	130.027	C5H6O4	[M-H]-	Methylenesuccinic acid	Organic acids	97-65-4	24796±11247	56945±4896	66883±5961	52934±3351	74159±20366	71212±3311	0.026
497	145.062	109.041	146.058	C6H10O4	[M-H]-	2,2-Dimethylsuccinic acid	Organic acids	597-43-3	80215±5930	84127±17188	87736±4247	92117±6273	91509±7445	101830±4796	0.402
498	117.056	59.0139	118.063	C5H10O3	[M-H]-	β-Hydroxyisovaleric acid	Organic acids	625-08-1	114940±16442	232493±20265	211970±23161	219539±20664	237874±26860	302177±14509	0.087
499	146.081	86.0601	145.074	C6H11NO3	[M+H]+	4-Acetamidobutyric acid	Organic acids	3025-96-5	1574397±120493	1471093±137664	1656015±168282	1677080±179938	1664469±79767	1528324±77381	0.271
500	147.03	87.0081	148.037	C5H8O5	[M-H]-	L-Citramalic acid	Organic acids	6236-09-5	145743±5983	213728±12899	230682±29992	235799±22964	287603±33471	388714±20131	0.039
501	122.025	78.0349	123.032	C6H5NO2	[M-H]-	2-Picolinic acid	Organic acids	98-98-6	138927±7074	162870±6777	222721±35060	268033±42670	270709±11103	246488±13703	0.017
502	103.04	59.0139	104.047	C4H8O3	[M-H]-	3-Hydroxybutyric acid	Organic acids	300-85-6	548246±68018	812169±146511	895556±51667	796138±18250	875150±6895	682477±38686	0.043
503	158.118	95.0861	157.11	C8H15NO2	[M+H]+	Tranexamic Acid	Organic acids	1197-18-8	817218±41167	928345±224940	812714±17219	860179±76922	875509±61239	819000±47511	0.621
504	166.975	78.9591	167.982	C3H5O6P	[M-H]-	Phosphoenolpyruvate	Organic acids	138-08-9	1343381±141298	1144413±97022	1032380±131447	804491±100067	676584±39432	687270±40130	0.013
505	263.129	204.115	264.136	C15H20O4	[M-H]-	Abscisic acid	Organic acids	21293-29-8	195782±33531	152652±20575	196130±14698	204230±17883	239059±17479	197887±13203	0.034
506	131.035	87.0459	132.042	C5H8O4	[M-H]-	Dimethylmalonic acid*	Organic acids	595-46-0	85476±8849	122456±6324	133890±27631	136420±6631	147712±8818	202967±13774	0.039
507	130.086	84.0818	129.079	C6H11NO2	[M+H]+	L-Pipecolic Acid	Organic acids	3105-95-1	5404086±512695	6048582±604911	5555146±1257526	6449100±1194648	6399457±527126	5476918±474810	0.429
508	131.035	87.0452	132.042	C5H8O4	[M-H]-	2-Methylsuccinic acid*	Organic acids	498-21-5	900335±74887	1288023±102744	1385991±53790	1494694±37103	1564217±42292	1869788±175589	0.012
509	279.158	149.023	278.152	C16H22O4	[M+H]+	Dibutyl phthalate*	Organic acids	84-74-2	13777772±198537	13500101±156196	12843767±149695	12938291±156959	13013248±740190	11940028±1200446	0.056
510	132.102	69.0699	131.095	C6H13NO2	[M+H]+	6-Aminocaproic acid	Organic acids	60-32-2	6660434±467691	5677626±248650	5677554±182186	4490804±321241	4788041±261877	5351293±539827	0.015
511	144.102	84.0813	143.095	C7H13NO2	[M+H]+	1-Methylpiperidine-2-carboxylic acid	Organic acids	7730-87-2	349626±20607	365472±11547	435775±120866	566711±50720	431645±45075	395186±42638	0.062
512	131.046	70.0297	132.054	C4H8N2O3	[M-H]-	3-Ureidopropionic Acid	Organic acids	462-88-4	92942±14393	111436±13495	90586±19015	53300±8331	62655±1599	88934±10589	0.019
513	145.051	101.061	146.058	C6H10O4	[M-H]-	2-Methylglutaric acid*	Organic acids	617-62-9	66188±6787	138368±21931	164250±6774	145664±14032	178668±2702	44163±5600	0.017
514	145.051	101.061	146.058	C6H10O4	[M-H]-	Adipic Acid*	Organic acids	124-04-9	66188±6787	138368±21931	164250±6774	145664±14032	178668±2702	44163±5600	0.017
515	149.009	87.0088	150.016	C4H6O6	[M-H]-	L-Tartaric acid	Organic acids	87-69-4	60798±1919	79579±18671	91534±19702	90444±8813	93879±4934	107198±14209	0.122
516	173.082	59.0139	174.089	C8H14O4	[M-H]-	2-Propylglutaric acid	Organic acids	32806-62-5	27130±9420	105868±19815	69488±24268	65894±25627	56763±12627	99856±13742	0.038
517	115.004	71.0139	116.011	C4H4O4	[M-H]-	Fumaric acid*	Organic acids	110-17-8	15324±2520	19798±1466	32878±18664	36238±6339	37759±10006	34972±5124	0.043
518	115.004	71.0139	116.011	C4H4O4	[M-H]-	Maleic acid*	Organic acids	110-16-7	15324±2520	19798±1466	32878±18664	36238±6339	37759±10006	34972±5124	0.043
519	168.991	78.9591	169.998	C3H7O6P	[M-H]-	DL-Glyceraldehyde-3-phosphate	Organic acids	591-59-3	95802±11822	88193±18994	113206±29696	95476±11239	102444±18281	115551±19123	0.603
520	158.082	116.072	159.089	C7H13NO3	[M-H]-	5-Acetamidopentanoic Acid	Organic acids	1072-10-2	68686±29033	150476±37879	161786±7799	199881±15091	196549±16338	144990±33234	0.016
521	103.004	59.0136	104.011	C3H4O4	[M-H]-	Hydroxypyruvic acid*	Organic acids	1113-60-6	53832±13103	71740±20749	68594±7711	71233±14364	70820±19616	87856±21854	0.705
522	103.004	59.0139	104.011	C3H4O4	[M-H]-	Tartronate semialdehyde*	Organic acids	2480-77-5	53832±13103	71740±20749	68594±7711	71233±14364	70820±19616	87856±21854	0.705
523	129.019	85.0295	130.027	C5H6O4	[M-H]-	Citraconic acid	Organic acids	498-23-7	216518±56428	462786±34881	467867±42718	537044±8054	424448±143853	371154±109999	0.035
524	131.035	87.0443	132.042	C5H8O4	[M-H]-	2-Hydroxy-2-methyl-3-oxobutanoic acid	Organic acids	71698-08-3	72216±24922	115920±10397	129792±10318	144206±10342	151803±19404	145981±64344	0.022
525	179.056	59.0139	180.063	C6H12O6	[M-H]-	D-Glucose*	Saccharides	50-99-7	1593219±131892	1458725±69818	1560208±138198	1819603±78934	1787623±104694	1992942±22681	0.054
526	179.056	59.0139	180.063	C6H12O6	[M-H]-	D-Fructose*	Saccharides	57-48-7	1578552±149617	1311159±116805	1603287±64135	1670368±81486	1682401±97120	1967987±24010	0.106
527	259.022	96.9696	260.03	C6H13O9P	[M-H]-	Glucose-1-phosphate*	Saccharides	59-56-3	5738694±259409	4591993±354651	3938713±218013	2945934±116514	2642941±246042	5892338±83259	0.01
528	157.16	157.16	158.167	C10H22O	[M-H]-	1-Decanol	Saccharides	112-30-1	1092740±259718	1164443±257963	1233685±258183	1397033±212118	1408553±47256	8596192±169682	0.301
529	135.03	75.0088	136.037	C4H8O5	[M-H]-	D-Threonic Acid	Saccharides	3909-12-4	1631522±48294	2244409±112601	2457389±59444	2266185±91253	2304094±90583	3306859±71331	0.032
530	195.051	75.0095	196.058	C6H12O7	[M-H]-	Gluconic acid	Saccharides	526-95-4	1395861±96683	1495455±162162	1676079±16964	1596734±45314	1621770±30252	1686528±41837	0.058
531	193.035	72.9931	194.043	C6H10O7	[M-H]-	D-Galacturonic acid*	Saccharides	685-73-4	128992±33980	90645±16586	119968±23939	137036±21013	136560±31155	146112±4094	0.249
532	193.035	72.9931	194.043	C6H10O7	[M-H]-	D-Glucoronic acid*	Saccharides	6556-12-3	162441±14329	150195±16265	120665±83430	174141±13005	172432±15988	182350±5705	0.429
533	338.99	78.9582	339.996	C6H14O12P2	[M-H]-	D-Glucose 1,6-bisphosphate	Saccharides	10139-18-1	34401±6217	32049±2471	31257±5524	26868±5654	32387±1845	43669±1483	0.514
534	179.055	59.0139	180.063	C6H12O6	[M-H]-	Inositol*	Saccharides	87-89-8	1651348±59152	1461418±69608	1675606±78414	1811690±107827	1835167±119014	1954142±70418	0.051
535	181.072	71.0139	182.079	C6H14O6	[M-H]-	D-Sorbitol	Saccharides	50-70-4	26880±7283	31844±7614	33537±8332	29680±9845	30760±4538	35869±1310	0.938
536	341.109	119.035	342.116	C12H22O11	[M-H]-	D-Trehalose*	Saccharides	99-20-7	533956±156353	347803±17177	443289±48458	329076±82439	394918±102095	419958±15415	0.141
537	184.98	78.9583	185.993	C3H7O7P	[M-H]-	3-Phospho-D-glyceric acid	Saccharides	820-11-1	2420410±157648	1621506±113435	1632936±126825	1245430±126285	1156830±46757	1267345±48752	0.016
538	341.109	113.022	342.116	C12H22O11	[M-H]-	Melibiose	Saccharides	585-99-9	472225±51724	372809±37814	424095±43874	335226±22405	363144±60022	382906±15656	0.113
539	209.067	59.0139	210.074	C7H14O7	[M-H]-	Sedoheptulose	Saccharides	3019-74-7	913908±101351	810545±133511	937019±40043	962404±70960	1041500±30289	1197785±49883	0.132
540	133.014	71.0139	134.022	C4H6O5	[M-H]-	3-Dehydro-L-Threonic Acid*	Saccharides	-	5912128±518989	5405829±388288	6548572±530024	7105435±90810	6794224±812017	8241488±345773	0.043
541	165.041	75.0091	166.048	C5H10O6	[M-H]-	D-Xylonic acid	Saccharides	526-91-0	4829887±303992	5071645±47752	5089288±197355	6788789±20477	7142649±204021	7176709±303638	0.02
542	289.033	96.9696	290.04	C7H15O10P	[M-H]-	D-Sedoheptuiose 7-phosphate	Saccharides	2646-35-7	1731746±209133	1378649±274629	1886653±100881	1956734±138390	1750608±315924	1487860±63792	0.199
543	149.046	75.0088	150.053	C5H10O5	[M-H]-	D-Ribose	Saccharides	50-69-1	569788±60697	533971±17490	537687±20143	635797±51881	677637±50296	664712±30923	0.042
544	259.022	96.9688	260.03	C6H13O9P	[M-H]-	D-Fructose 6-Phosphate*	Saccharides	643-13-0	4125274±63578	3115147±107422	2852072±317830	2181342±129407	1926777±77651	3722116±180091	0.01
545	341.109	119.035	342.116	C12H22O11	[M-H]-	D-Sucrose*	Saccharides	57-50-1	932435±174021	704103±35495	738989±118690	671407±61964	836917±127064	682553±33201	0.132
546	229.012	96.9696	230.019	C5H11O8P	[M-H]-	Ribulose-5-phosphate	Saccharides	4300-28-1	299887±57853	177795±7770	152799±6337	92283±10939	97992±9705	176573±8879	0.011
547	259.022	96.9696	260.03	C6H13O9P	[M-H]-	D-Glucose 6-phosphate*	Saccharides	56-73-5	6141839±50089	4738756±150852	4522846±487811	3298561±76971	2810289±66411	5218421±268941	0.012
548	179.056	59.0139	180.063	C6H12O6	[M-H]-	D-Galactose*	Saccharides	59-23-4	1170746±423154	1439680±33939	1572576±86767	1953486±218437	1938593±148398	1971361±103576	0.014
549	209.03	85.0297	210.038	C6H10O8	[M-H]-	D-Galactaric acid*	Saccharides	526-99-8	848992±58214	802809±67021	859568±33141	957469±42078	975434±75733	1165588±65338	0.056
550	181.072	101.024	182.079	C6H14O6	[M-H]-	Dulcitol*	Saccharides	608-66-2	119969±8740	149501±31377	192235±4289	174372±38433	163340±8390	203635±12222	0.065
551	181.072	101.024	182.079	C6H14O6	[M-H]-	D-Mannitol*	Saccharides	69-65-8	119969±8740	149501±31377	192235±4289	174372±38433	163340±8390	203635±12222	0.065
552	179.056	59.0139	180.063	C6H12O6	[M-H]-	D-Mannose*	Saccharides	3458-28-4	1364545±83459	1098213±93463	1314104±75706	1552423±135458	1507738±74428	1568766±95461	0.015
553	343.125	89.0254	344.132	C12H24O11	[M-H]-	Maltitol	Saccharides	585-88-6	47983±10159	57658±8658	63639±21242	48431±9752	42527±9532	56252±3430	0.343
554	168.988	78.9583	169.998	C3H7O6P	[M-H]-	Dihydroxyacetone phosphate	Saccharides	57-04-5	129350±13218	133986±7936	120539±10228	158450±7171	153479±3469	264089±17478	0.028
555	209.031	85.0294	210.038	C6H10O8	[M-H]-	D-Saccharic acid*	Saccharides	87-73-0	927903±29641	912774±66022	1022353±26082	1073474±19075	1156001±83837	1176403±80648	0.014
556	163.061	59.0139	164.069	C6H12O5	[M-H]-	L-Fucose	Saccharides	2438-80-4	310010±189156	610139±107790	262082±172732	447546±352661	207584±273720	84096±6065	0.308
557	163.061	59.0139	164.069	C6H12O5	[M-H]-	Rhamnose*	Saccharides	3615-41-6	310010±189156	610139±107790	262082±172732	447546±352661	207584±273720	84096±6065	0.308
558	163.061	59.0139	164.069	C6H12O5	[M-H]-	D-Fucose*	Saccharides	3615-37-0	310010±189156	610139±107790	262082±172732	447546±352661	207584±273720	84096±6065	0.308
559	300.049	96.9696	301.056	C8H16NO9P	[M-H]-	N-Acetyl-D-glucosamine-1-phosphate	Saccharides	6866-69-9	307573±20170	258453±29675	324372±19342	328847±14310	293592±37378	289281±21298	0.115
560	421.075	241.012	422.082	C12H23O14P	[M-H]-	Trehalose 6-phosphate	Saccharides	4484-88-2	42470±15646	30369±17826	37849±20474	27859±4582	35646±31633	35970±2888	0.827
561	341.109	179.056	342.116	C12H22O11	[M-H]-	Galactinol	Saccharides	3687-64-7	2424516±537398	1517126±156633	1775614±454457	1730899±115097	1802852±329041	1659537±151496	0.182
562	149.046	59.0141	150.053	C5H10O5	[M-H]-	DL-Xylose	Saccharides	25990-60-7	213651±9241	201968±36124	206037±8867	212113±9658	234309±6515	241622±22155	0.284
563	193.072	59.0139	194.079	C7H14O6	[M-H]-	D-Pinitol	Saccharides	10284-63-6	210768±10173	181939±2468	193751±14335	222434±12241	187978±6935	208614±19264	0.034
564	163.061	101.024	164.069	C6H12O5	[M-H]-	1,5-Anhydro-D-glucitol	Saccharides	154-58-5	134877±27393	142908±30368	179163±9350	188960±7949	203748±14182	149670±14405	0.022
565	149.046	59.0132	150.053	C5H10O5	[M-H]-	D-Arabinose	Saccharides	10323-20-3	211216±14831	222709±22524	217924±12507	238198±13312	224796±28599	253766±25795	0.621
566	222.097	84.0451	221.09	C8H15NO6	[M+H]+	N-Acetyl-D-galactosamine	Saccharides	1811-31-0	710850±49466	851606±106721	809878±60205	768286±46629	769175±84625	807820±110176	0.294
567	341.109	89.0244	342.116	C12H22O11	[M-H]-	D-Maltose*	Saccharides	69-79-4	1007359±212089	588221±131289	709548±159251	498766±34316	604771±43276	686836±94456	0.036
568	341.109	89.0249	342.116	C12H22O11	[M-H]-	Isomaltulose*	Saccharides	13718-94-0	888130±73704	655500±95972	703086±142014	574234±78038	595828±54384	693435±105124	0.106
569	199.002	78.9585	200.009	C4H9O7P	[M-H]-	D-Erythrose-4-phosphate	Saccharides	585-18-2	42686±4834	27442±6541	28321±3532	24059±2952	24228±2823	40371±6464	0.083
570	341.109	89.0246	342.116	C12H22O11	[M-H]-	Lactobiose	Saccharides	63-42-3	125480±8871	98125±36764	90527±12092	99763±27942	116641±15203	75705±12229	0.371
571	222.097	138.055	221.09	C8H15NO6	[M+H]+	N-Acetyl-D-glucosamine	Saccharides	7512-17-6	2575±1402	2028±1765	1592±245	2083±884	2401±1772	1831±297	0.844
572	180.087	163.06	179.079	C6H13NO5	[M+H]+	D-Glucosamine	Saccharides	3416-24-8	10480775±570636	14253435±3565939	10740992±1148186	12219385±2411093	14781042±2196434	12539030±2417364	0.161
573	503.162	179.055	504.169	C18H32O16	[M-H]-	Raffinose*	Saccharides	512-69-6	45255±11023	29116±10299	50071±3988	39308±4790	52817±8376	51364±11093	0.057
574	261.038	78.9588	262.045	C6H15O9P	[M-H]-	Sorbitol-6-phosphate	Saccharides	20479-58-7	35453±4243	33988±2241	29628±2597	15870±2123	21520±5087	32191±7743	0.016
575	503.162	179.055	504.169	C18H32O16	[M-H]-	D-Panose*	Saccharides	33401-87-5	13761±4655	13298±4330	20692±4706	13399±5236	28625±2978	16872±4616	0.065
576	338.989	96.9696	339.996	C6H14O12P2	[M-H]-	D-Fructose-1,6-biphosphate	Saccharides	488-69-7	80283±18719	31223±8386	30540±4825	28488±6315	50882±3878	28449±9392	0.021
577	165.082	59.0159	166.084	C6H14O5	[M-H]-	L-Fucitol	Saccharides	13074-06-1	397502±162896	604339±59580	669291±70805	646060±186810	836201±241568	635691±221924	0.255
578	341.117	73.0319	342.116	C12H22O11	[M-H]-	D-Cellobiose	Saccharides	528-50-7	34615±9697	24616±7329	30299±10291	30818±5861	34944±854	32569±12231	0.429
579	285.208	223.211	286.214	C16H30O4	[M-H]-	Hexadecanedioic acid	Lipids	505-54-4	23040±1243	27196±1023	28914±2007	33589±1065	36318±1097	36792±138	0.01
580	295.228	195.139	296.235	C18H32O3	[M-H]-	9S-Hydroxy-10E,12Z-octadecadienoic acid*	Lipids	15514-85-9	1062974±25533	115566±5932	139380±7193	132727±17843	180955±8172	351277±2893	0.014
581	255.233	237.222	256.24	C16H32O2	[M-H]-	Palmitic acid	Lipids	57-10-3	148079±6285	127260±9640	124391±6679	147032±5656	152456±16139	110970±1195	0.048
582	311.223	171.138	312.23	C18H32O4	[M-H]-	13S-Hydroperoxy-9Z,11E-octadecadienoic acid	Lipids	33964-75-9	101161±8478	96484±11338	95413±6741	101575±15374	111445±18425	79525±933	0.609
583	199.17	199.17	200.178	C12H24O2	[M-H]-	Dodecanoic acid (Lauric acid)	Lipids	143-07-7	58812±1628	36936±4247	37107±1746	38750±1822	40919±723	87158±1467	0.059
584	277.217	277.217	278.225	C18H30O2	[M-H]-	α-Linolenic Acid*	Lipids	463-40-1	104418336±752020	40052307±1771752	48532172±947929	74411285±1960154	83798860±1106115	55528762±953905	0.009
585	239.238	223.242	240.245	C16H32O	[M-H]-	Palmitaldehyde	Lipids	629-80-1	13529256±1455198	17927586±1015115	19202644±2564077	19149887±1162865	20894025±142428	25354601±462107	0.042
586	295.228	195.141	296.235	C18H32O3	[M-H]-	13(S)-Hydroxyoctadeca-9Z,11E-dienoic acid*	Lipids	10219-69-9	966813±65410	102172±2172	125585±3737	125277±7328	163401±5729	345829±6304	0.012
587	303.252	57.0702	302.246	C17H34O4	[M+H]+	1-Monomyristin	Lipids	589-68-4	255302±21118	238680±39524	248796±42052	222477±39015	215892±18291	136743±2587	0.504
588	309.28	309.28	310.287	C20H38O2	[M-H]-	Eicosenoic acid	Lipids	26764-41-0	5519408±180238	4862914±925805	4663025±845565	5039215±778609	6490560±1234618	6335654±127207	0.402
589	293.214	195.139	294.219	C18H30O3	[M-H]-	13S-Hydroxy-9Z,11E,15Z-octadecatrienoic acid	Lipids	87984-82-5	625488±48536	16644±931	21910±872	18433±1053	29370±2595	186909±3806	0.01
590	291.195	191.107	290.188	C18H26O3	[M+H]+	4-Oxo-9Z,11Z,13E,15E-Octadecatetraenoic Acid	Lipids	-	154485±8049	41654±2931	56978±10821	26863±2829	30869±4892	60136±1333	0.01
591	311.223	249.225	312.23	C18H32O4	[M-H]-	7S,8S-DiHODE	Lipids	143288-65-7	37410±2407	28996±1824	35952±2737	38267±1524	53606±7271	46095±1023	0.025
592	295.229	195.14	296.235	C18H32O3	[M-H]-	alpha-Hydroxylinoleic acid	Lipids	57818-44-7	782198±28046	85491±6614	105225±7637	102102±5022	133359±12650	296842±7736	0.012
593	299.26	253.255	300.266	C18H36O3	[M-H]-	2R-Hydroxyoctadecanoic Acid*	Lipids	26633-48-7	106529±3881	130014±4982	127141±4246	113650±8121	116857±8765	107928±3080	0.038
594	243.161	181.158	244.167	C13H24O4	[M-H]-	Tridecanedioic acid	Lipids	505-52-2	19370±1498	26853±4058	24741±2105	23717±2108	31251±4033	45546±1467	0.032
595	277.217	277.219	278.225	C18H30O2	[M-H]-	γ-Linolenic Acid*	Lipids	506-26-3	81791940±37167228	39909222±3610425	47068701±4940346	69712101±6188373	86462738±688467	56719541±2082765	0.094
596	329.233	229.146	330.241	C18H34O5	[M-H]-	9,10,13-Trihydroxy-11-Octadecenoic Acid	Lipids	29907-57-1	49940±1821	31344±2153	48919±607	42052±5476	52869±1526	47583±1862	0.013
597	299.259	253.251	300.266	C18H36O3	[M-H]-	DL-2-hydroxystearic acid*	Lipids	629-22-1	106102±4846	109234±47391	120674±9729	105994±22514	114517±11892	115119±4983	0.598
598	297.245	183.14	298.251	C18H34O3	[M-H]-	Ricinoleic acid	Lipids	141-22-0	21894±2787	19594±767	20806±1867	21300±1591	22063±2383	19960±920	0.633
599	279.232	149.132	278.225	C18H30O2	[M+H]+	Octadeca-11E,13E,15Z-trienoic acid	Lipids	25575-00-2	13538442±2872976	14937907±1850295	14645468±2338581	13219364±1649907	12862096±2218941	11354339±525097	0.563
600	253.217	235.207	254.225	C16H30O2	[M-H]-	Palmitoleic Acid*	Lipids	373-49-9	37777±2954	36023±1256	38650±1218	40384±2975	41647±2547	54252±2543	0.083
601	309.207	209.054	310.214	C18H30O4	[M-H]-	9-Hydroperoxy-10E,12,15Z-octadecatrienoic acid	Lipids	111004-08-1	26898±6364	11899±3357	10165±1722	11878±1994	17448±2009	44015±2113	0.023
602	293.213	185.119	294.219	C18H30O3	[M-H]-	2R-hydroxy-9Z,12Z,15Z-octadecatrienoic acid	Lipids	-	146182±14167	82510±1259	102559±3577	87105±4785	96571±890	101227±5037	0.011
603	215.129	153.127	216.136	C11H20O4	[M-H]-	Undecanedioic acid	Lipids	1852-04-6	9055±3973	11264±1583	14449±751	15956±3385	19647±734	18728±933	0.021
604	279.233	59.0133	280.24	C18H32O2	[M-H]-	(9Z,11E)-Octadecadienoic acid*	Lipids	2540-56-9	108347±12916	43051±1194	43618±1238	84080±6866	94108±4494	73444±3716	0.016
605	279.233	59.0139	280.24	C18H32O2	[M-H]-	Linoleic acid*	Lipids	60-33-3	108347±12916	43051±1194	43618±1238	84080±6866	94108±4494	73444±3716	0.016
606	287.223	287.223	288.23	C16H32O4	[M-H]-	9,16-Dihydroxypalmitic acid	Lipids	38076-49-2	196428±15703	123905±13238	161770±17304	210818±5504	238183±5354	193938±10171	0.011
607	295.228	195.138	296.235	C18H32O3	[M-H]-	12,13-Epoxy-9-Octadecenoic Acid	Lipids	6799-85-5	20243±1312	7160±432	9928±591	11077±1670	14246±1026	13013±694	0.011
608	285.244	239.238	286.251	C17H34O3	[M-H]-	3-Hydroxy-palmitic acid methyl ester	Lipids	51883-36-4	14378±4433	17307±5342	13552±2289	17974±3083	19598±2118	19140±1075	0.291
609	293.213	113.098	294.219	C18H30O3	[M-H]-	17-Hydroxylinolenic acid	Lipids	-	324227±16396	41575±2684	49547±1580	50985±2225	63730±4484	111008±6270	0.012
610	277.217	59.0139	278.225	C18H30O2	[M-H]-	Crepenynic acid	Lipids	2277-31-8	615401±51464	150194±5991	168550±3076	305414±829	382204±13606	379941±21477	0.009
611	257.177	195.178	258.183	C14H26O4	[M-H]-	1,14-Tetradecanedioic Acid	Lipids	821-38-5	11016±1558	10921±1434	11626±667	13053±172	13754±1775	15581±889	0.088
612	283.264	283.26	284.272	C18H36O2	[M-H]-	16-Methylheptadecanoic acid	Lipids	2724-58-5	48877715±3400535	67598908±6180233	63506054±10206648	72621246±9735607	70950816±3599372	61137012±3555466	0.095
613	283.264	283.265	284.272	C18H36O2	[M-H]-	Stearic Acid	Lipids	57-11-4	46694035±4113765	51783414±9176460	56359673±7012744	65665110±10137822	63844689±2426601	48822941±2845303	0.067
614	293.212	235.172	294.219	C18H30O3	[M-H]-	9-Hydroxy-10,12,15-octadecatrienoic acid*	Lipids	89886-42-0	9487±1501	1505±386	1945±621	2110±112	2231±1486	5965±356	0.075
615	279.232	95.0855	278.225	C18H30O2	[M+H]+	Punicic acid	Lipids	544-72-9	2253242±182876	472438±42415	579330±17409	466133±102652	552109±72502	814898±55755	0.031
616	313.238	251.24	314.246	C18H34O4	[M-H]-	(9Z)-12,13-Dihydroxyoctadec-9-enoic acid	Lipids	263399-35-5	32207±703	46133±2343	45957±2440	50638±2227	61004±728	54768±3903	0.017
617	241.218	241.211	242.225	C15H30O2	[M-H]-	13-methylmyristic acid	Lipids	2485-71-4	138053±9334	147119±12378	162252±16855	163078±4835	141955±8036	323132±24480	0.119
618	309.205	227.203	310.214	C18H30O4	[M-H]-	13(s)-hydroperoxy-(9z,11e,15z)-octadecatrienoic acid	Lipids	67597-26-6	140566±4296	105492±8384	97588±6722	106438±3965	106703±3867	130944±10471	0.053
619	311.223	293.214	312.23	C18H32O4	[M-H]-	9-Hydroperoxy-9Z,11E-Octadecadienoic Acid	Lipids	-	77549±20846	49535±6117	52647±8213	55854±2022	57552±4182	57130±4619	0.122
620	281.249	281.25	282.256	C18H34O2	[M-H]-	11-Octadecanoic acid(Vaccenic acid)	Lipids	506-17-2	16793149±188001	12200481±249685	13539908±209255	16240878±603415	18424510±1229915	14835488±1281260	0.01
621	311.223	293.213	312.23	C18H32O4	[M-H]-	9-Hydroxy-13-oxo-10-octadecenoic Acid	Lipids	-	30084±1713	26943±2718	30390±2199	29915±7587	34394±6168	27854±2507	0.575
622	241.217	241.218	242.225	C15H30O2	[M-H]-	Pentadecanoic Acid	Lipids	1002-84-2	322963±38259	408796±14130	406047±43962	391879±9670	392431±29819	541251±49665	0.102
623	297.316	183.211	298.324	C20H42O	[M-H]-	1-Eicosanol	Lipids	629-96-9	22923±1406	19434±2154	22361±1560	22339±752	22975±764	19340±1834	0.246
624	295.228	171.103	296.235	C18H32O3	[M-H]-	9R,10S)-(12Z)-9,10-Epoxyoctadecenoic acid	Lipids	16833-56-0	11376±1312	6363±410	6732±174	7381±261	10922±1279	7552±832	0.015
625	281.249	281.248	282.256	C18H34O2	[M-H]-	Elaidic Acid	Lipids	112-79-8	15714384±506158	10982036±411802	12602082±137621	15556687±1206337	17104023±1054254	13495497±1621486	0.017
626	311.223	249.221	312.23	C18H32O4	[M-H]-	13-Hydroperoxy-9Z,11E-octadecadienoic acid*	Lipids	23017-93-8	11179±1568	8268±1207	10887±2704	12411±4502	11500±1959	9606±1238	0.312
627	299.259	299.256	300.266	C18H36O3	[M-H]-	3-Hydroxyoctadecanoic Acid	Lipids	45261-96-9	175420±24417	191799±44929	170090±26458	237019±38696	264284±15156	264774±35890	0.065
628	307.264	307.264	308.272	C20H36O2	[M-H]-	Eicosadienoic acid	Lipids	5598-38-9	1104688±293447	552560±132470	627159±54077	1077952±225948	1174667±160309	135007±18742	0.035
629	239.202	223.026	240.209	C15H28O2	[M-H]-	Cis-10-Pentadecenoic Acid(C15:1)	Lipids	84743-29-3	889802±25703	898565±91582	900308±167705	1072822±66822	1247718±305525	5621363±789793	0.163
630	313.238	183.14	314.246	C18H34O4	[M-H]-	Hydroxy ricinoleic acid	Lipids	-	2784±728	2398±675	2848±488	2412±594	2376±564	3030±476	0.779
631	311.296	311.296	312.303	C20H40O2	[M-H]-	Arachidic acid	Lipids	506-30-9	1090605±198811	689713±226416	982949±88801	1019906±59633	869439±200196	549555±105268	0.234
632	293.248	95.0855	292.24	C19H32O2	[M+H]+	Methyl linolenate	Lipids	301-00-8	217109±54134	11943±4575	14772±7465	11274±909	18868±913	50392±12754	0.045
633	282.279	247.243	281.272	C18H35NO	[M+H]+	Oleamide (9-Octadecenamide)	Lipids	301-02-0	5142±221	5435±524	3304±722	3523±1007	3166±226	3986±1035	0.033
634	496.34	184.073	495.332	C24H50NO7P	[M+H]+	LysoPC 16:0	Lipids	17364-16-8	58332142±1296201	13732888±169980	14146229±414923	12617832±513122	16612196±360924	27851527±609953	0.011
635	522.355	184.073	521.348	C26H52NO7P	[M+H]+	LysoPC 18:1(2n isomer)	Lipids	-	3605204±184010	1717673±78330	1989262±206150	2471997±187813	3346998±147851	2727822±61514	0.012
636	536.371	184.073	535.364	C27H54NO7P	[M+H]+	LysoPC 19:1	Lipids	-	69440±18927	20473±6591	19901±8112	24684±4976	21692±13313	42787±979	0.124
637	546.355	184.073	545.348	C28H52NO7P	[M+H]+	LysoPC 20:3	Lipids	1199257-41-4	227215±4376	55970±9567	55698±4554	58929±4805	79144±6191	107075±2947	0.027
638	468.308	184.073	467.301	C22H46NO7P	[M+H]+	LysoPC 14:0	Lipids	20559-16-4	95199±4752	24961±472	21292±3575	23258±6815	31373±4966	40885±1280	0.032
639	494.324	184.073	493.317	C24H48NO7P	[M+H]+	LysoPC 16:1(2n isomer)	Lipids	-	353380±31714	203608±16084	210146±10795	283229±21916	382679±28680	313843±10108	0.015
640	518.324	184.073	517.317	C26H48NO7P	[M+H]+	LysoPC 18:3(2n isomer)	Lipids	-	6707215±474095	2465437±105636	2615384±52812	3715590±381483	4994874±238474	4637365±179017	0.009
641	492.308	184.073	491.301	C24H46NO7P	[M+H]+	LysoPC 16:2	Lipids	-	236459±11793	72478±5284	72764±10378	85611±2692	116344±10349	113735±4410	0.014
642	524.371	184.073	523.364	C26H54NO7P	[M+H]+	LysoPC 18:0	Lipids	19420-57-6	2330762±76663	669805±9185	621244±35026	504167±4749	652903±20885	1106820±44795	0.014
643	496.34	184.073	495.332	C24H50NO7P	[M+H]+	LysoPC 16:0(2n isomer)	Lipids	-	14460429±1329374	2626888±170856	2860807±311886	2513712±167073	3397426±66133	5824143±237545	0.019
644	506.324	184.073	505.317	C25H48NO7P	[M+H]+	LysoPC 17:2	Lipids	-	58097±7206	24557±3199	25293±1915	39098±4938	56204±3616	48294±2041	0.016
645	510.355	184.073	509.348	C25H52NO7P	[M+H]+	LysoPC 17:0	Lipids	50930-23-9	63149±5195	14529±1215	14386±1154	11828±1630	16216±997	26754±1283	0.025
646	550.387	184.073	549.379	C28H56NO7P	[M+H]+	LysoPC 20:1	Lipids	-	195613±11769	80315±2294	75186±2493	85677±631	109657±5303	115336±5576	0.009
647	518.324	184.073	517.317	C26H48NO7P	[M+H]+	LysoPC 18:3	Lipids	-	58999907±1823731	25618978±1143830	26905003±556992	39854135±1604856	54729760±1170783	46053185±2352357	0.011
648	520.34	184.073	519.332	C26H50NO7P	[M+H]+	LysoPC 18:2(2n isomer)	Lipids	-	8127765±530974	2974959±394896	3104508±399040	4144152±204433	6158721±1010969	5082092±266662	0.011
649	548.371	184.073	547.364	C28H54NO7P	[M+H]+	LysoPC 20:2	Lipids	-	315618±6119	98046±7605	98092±5016	112017±7277	139863±17515	169228±8906	0.017
650	548.371	184.073	547.364	C28H54NO7P	[M+H]+	LysoPC 20:2(2n isomer)	Lipids	-	65144±6336	23128±3240	21329±154	30565±1876	37761±1441	38989±2272	0.012
651	480.308	184.073	479.301	C23H46NO7P	[M+H]+	LysoPC 15:1	Lipids	-	161369±11083	50542±3097	52034±4456	57121±4613	73340±2136	89234±5875	0.019
652	520.34	184.073	519.332	C26H50NO7P	[M+H]+	LysoPC 18:2	Lipids	-	64610642±2870066	25172750±1159122	26923388±296318	36775121±769849	50931031±1079388	44574309±2984021	0.009
653	494.324	184.073	493.317	C24H48NO7P	[M+H]+	LysoPC 16:1	Lipids	76790-27-7	1694453±636014	389175±206692	401735±160531	477881±187483	608381±273487	557022±39523	0.069
654	524.371	184.073	523.364	C26H54NO7P	[M+H]+	LysoPC 18:0(2n isomer)	Lipids	-	389269±16600	113838±2802	107997±12965	102845±5133	127254±7045	183418±13242	0.024
655	492.308	184.073	491.301	C24H46NO7P	[M+H]+	LysoPC 16:2(2n isomer)	Lipids	-	233216±14276	73164±1870	75072±6078	85491±4571	107556±12639	115074±8712	0.014
656	522.355	184.073	521.348	C26H52NO7P	[M+H]+	LysoPC 18:1	Lipids	-	4809375±365820	1834478±84537	1877258±85948	2051261±26798	2930618±90425	3068094±256990	0.012
657	508.34	184.073	507.332	C25H50NO7P	[M+H]+	LysoPC 17:1	Lipids	-	213521±11995	46688±20410	48951±17080	38980±21032	52300±8809	103830±8836	0.127
658	482.324	184.073	481.317	C23H48NO7P	[M+H]+	LysoPC 15:0	Lipids	108273-89-8	253427±21536	52219±6235	47447±1478	46396±5189	52678±8380	89338±8307	0.09
659	482.324	184.073	481.317	C23H48NO7P	[M+H]+	LysoPC 15:0(2n isomer)	Lipids	-	69865±2846	16883±1590	12027±1562	14864±1984	17880±4296	29526±4126	0.034
660	510.355	184.073	509.348	C25H52NO7P	[M+H]+	LysoPC 17:0(2n isomer)	Lipids	-	128577±10367	31305±258	26191±3193	25791±3827	32158±3207	53539±7749	0.016
661	504.308	363.289	503.301	C25H46NO7P	[M+H]+	LysoPE 20:3	Lipids	-	43971±5151	12027±560	12810±1305	13437±565	15132±386	23645±248	0.017
662	504.308	363.289	503.301	C25H46NO7P	[M+H]+	LysoPE 20:3(2n isomer)	Lipids	-	43467±5144	9946±2030	10171±2316	8916±2040	15471±1436	19184±360	0.026
663	468.308	327.289	467.301	C22H46NO7P	[M+H]+	LysoPE 17:0	Lipids	-	24560±1840	6241±564	5924±681	5173±485	6174±416	10480±198	0.04
664	480.308	339.289	479.301	C23H46NO7P	[M+H]+	LysoPE 18:1(2n isomer)	Lipids	-	683966±6925	270493±13603	274428±12825	307161±16466	389823±14415	399354±10627	0.014
665	478.293	337.274	477.286	C23H44NO7P	[M+H]+	LysoPE 18:2	Lipids	-	10955532±288615	3975237±163445	4131227±72083	5847384±261916	7530628±136399	6495239±209640	0.01
666	454.293	313.274	453.286	C21H44NO7P	[M+H]+	LysoPE 16:0(2n isomer)	Lipids	-	5771569±330027	1237808±48671	1254858±54353	1336808±25972	1671283±47231	2634303±114802	0.012
667	454.293	313.274	453.286	C21H44NO7P	[M+H]+	LysoPE 16:0	Lipids	53862-35-4	17919442±820464	4370952±36344	4896631±202025	4687574±123152	5733666±203270	9117535±474162	0.01
668	452.277	311.258	451.27	C21H42NO7P	[M+H]+	LysoPE 16:1(2n isomer)	Lipids	-	54111±5732	86911±580	74109±7886	70767±8920	57378±5287	67961±3607	0.015
669	506.324	365.305	505.317	C25H48NO7P	[M+H]+	LysoPE 20:2	Lipids	-	61690±4200	14754±910	14088±135	16329±902	16835±646	27335±1537	0.019
670	480.308	339.289	479.301	C23H46NO7P	[M+H]+	LysoPE 18:1	Lipids	89576-29-4	1789240±101368	519733±8420	560718±21719	601928±20069	727590±22101	910927±60777	0.009
671	476.277	335.258	475.27	C23H42NO7P	[M+H]+	LysoPE 18:3(2n isomer)	Lipids	-	7385650±483664	3011643±314962	3034290±105404	4466045±218019	6058543±1016699	5045783±351725	0.013
672	466.293	325.274	465.286	C22H44NO7P	[M+H]+	LysoPE 17:1	Lipids	-	58893±14177	30885±6984	32041±3558	43003±3980	38080±6183	45343±3168	0.037
673	440.277	299.258	439.27	C20H42NO7P	[M+H]+	LysoPE 15:0	Lipids	-	36288±1551	13921±6063	9446±2393	10954±5302	11777±564	17150±1254	0.086
674	482.324	341.305	481.317	C23H48NO7P	[M+H]+	LysoPE 18:0(2n isomer)	Lipids	-	25878±2728	7306±532	7983±479	8101±1222	10256±691	12024±955	0.02
675	452.277	311.258	451.27	C21H42NO7P	[M+H]+	LysoPE 16:1	Lipids	-	313476±7696	131391±21248	112857±8946	147719±3404	152876±6528	162066±13426	0.025
676	476.277	335.258	475.27	C23H42NO7P	[M+H]+	LysoPE 18:3	Lipids	-	7434795±417501	2613253±60292	2889174±233600	4261128±269789	5932171±231106	4814996±399431	0.009
677	478.293	337.274	477.286	C23H44NO7P	[M+H]+	LysoPE 18:2(2n isomer)	Lipids	-	10876345±989272	5170269±276020	5914256±306919	7951990±681963	9828485±866558	7603129±672315	0.01
678	482.324	341.305	481.317	C23H48NO7P	[M+H]+	LysoPE 18:0	Lipids	69747-55-3	245352±19504	66831±1027	65723±1168	57990±2839	66702±2311	125100±11667	0.024
679	426.262	285.242	425.254	C19H40NO7P	[M+H]+	LysoPE 14:0	Lipids	-	53797±7192	16983±1494	17663±2157	14246±524	18026±262	24382±2383	0.024
680	426.262	285.242	425.254	C19H40NO7P	[M+H]+	LysoPE 14:0(2n isomer)	Lipids	-	14823±2413	5647±966	3999±1191	4297±598	6057±1033	7219±745	0.025
681	466.293	325.274	465.286	C22H44NO7P	[M+H]+	LysoPE 17:1(2n isomer)	Lipids	-	68520±4077	29450±2040	28438±952	33049±2552	34993±794	38242±4872	0.019
682	440.277	299.258	439.27	C20H42NO7P	[M+H]+	LysoPE 15:0(2n isomer)	Lipids	-	10233±949	3147±1186	2563±1324	3412±1496	3371±834	5899±1221	0.101
683	515.322	261.221	514.314	C27H46O9	[M+H]+	2-α-Linolenoyl-glycerol-1-O-glucoside	Lipids	-	263404±19437	25501±351	27128±665	50681±1274	97787±8265	104346±986	0.009
684	677.374	261.221	676.367	C33H56O14	[M+H]+	2-α-Linolenoyl-glycerol-1,3-di-O-glucoside	Lipids	-	16817±2697	6202±1129	7658±2208	9687±1283	20353±3319	14947±395	0.015
685	357.3	265.253	356.293	C21H40O4	[M+H]+	1-Oleoyl-Sn-Glycerol	Lipids	129784-87-8	55658±22062	46335±4397	54925±6572	61989±6462	56421±15296	63956±1872	0.541
686	515.322	261.221	514.314	C27H46O9	[M+H]+	1-α-Linolenoyl-glycerol-3-O-glucoside	Lipids	-	262287±29445	25377±149	28595±968	51814±2346	97694±8411	104113±7848	0.009
687	353.269	261.221	352.261	C21H36O4	[M+H]+	1-α-Linolenoyl-glycerol	Lipids	-	1335693±186462	51437±3576	69375±4114	135416±19639	571448±17308	547183±69927	0.009
688	677.374	261.221	676.367	C33H56O14	[M+H]+	1-α-Linolenoyl-glycerol-2,3-di-O-glucoside	Lipids	-	18373±2301	6975±1021	8052±2773	11728±1550	24865±3548	15603±2035	0.014
689	353.269	261.221	352.261	C21H36O4	[M+H]+	2-α-Linolenoyl-glycerol	Lipids	55268-58-1	287900±28598	26706±289	36619±2946	63709±1845	215480±32274	132032±17952	0.009
690	355.284	263.237	354.277	C21H38O4	[M+H]+	1-Linoleoylglycerol	Lipids	2277-28-3	383169±25017	17979±1226	20522±2649	32070±5143	138661±8160	149007±21773	0.01
691	331.284	313.273	330.277	C19H38O4	[M+H]+	Monopalmitin	Lipids	542-44-9	233219±8939	195157±15195	203923±50202	212340±18038	177925±20208	199150±31224	0.163
692	355.284	263.237	354.277	C21H38O4	[M+H]+	2-Linoleoylglycerol	Lipids	3443-82-1	81481±5492	10484±756	13609±2204	20476±1635	68295±3910	45774±8075	0.009
693	274.274	256.265	273.267	C16H35NO2	[M+H]+	Hexadecylsphingosine	Lipids	-	3795873±248271	3984407±59438	3529162±253453	3603444±230327	3716396±183033	2906987±161843	0.234
694	318.3	60.0444	317.293	C18H39NO3	[M+H]+	4-Hydroxysphinganine	Lipids	554-62-1	340676±10858	514376±12489	482819±39808	489639±17410	482625±14888	496002±28759	0.064
695	417.156	402.1	418.163	C22H26O8	[M-H]-	Syringaresinol	Lignans	21453-71-4	22850±2148	35392±2905	39202±2799	38304±3541	28873±5137	54062±1029	0.029
696	177.055	117.04	178.063	C10H10O3	[M-H]-	3,4-Methylenedioxy cinnamyl alcohol	Lignans	58095-76-4	647564±375930	786692±345787	545545±11005	493011±41749	513367±14928	767805±31366	0.106
697	523.218	361.14	524.226	C26H36O11	[M-H]-	Secoisolariciresinol 4-O-glucoside	Lignans	-	29447±1356	52664±7289	44616±5206	50835±13537	63276±5730	91533±5711	0.038
698	359.149	137.063	358.142	C20H22O6	[M+H]+	Matairesinol	Lignans	580-72-3	36932±2602	43304±2309	44226±4665	37305±1310	40508±3791	33783±2213	0.065
699	519.187	357.136	520.194	C26H32O11	[M-H]-	Pinoresinol-4-O-glucoside	Lignans	41607-20-9	220992±30486	287344±8994	283528±36009	379924±67482	411040±51709	643266±42926	0.019
700	359.149	131.049	358.142	C20H22O6	[M+H]+	Dehydrodiconiferyl alcohol	Lignans	4263-87-0	132873±8806	168808±20622	190702±15361	130909±31675	116826±18619	166273±11868	0.038
701	357.134	151.038	358.142	C20H22O6	[M-H]-	Pinoresinol*	Lignans	487-36-5	109352±11521	157814±22307	163143±21425	164556±16497	169292±30373	206305±21647	0.131
702	521.203	359.149	522.21	C26H34O11	[M-H]-	Isolariciresinol-9'-O-glucoside*	Lignans	63358-12-3	8763±4356	26528±18992	17288±8204	22603±13220	20471±15911	34633±5268	0.654
703	521.203	359.149	522.21	C26H34O11	[M-H]-	Dihydrodehydrodiconiferyl alcohol-4-O-glucoside*	Lignans	-	8763±4356	26528±18992	17288±8204	22603±13220	20471±15911	34633±5268	0.654
704	357.134	151.044	358.142	C20H22O6	[M-H]-	Epipinoresinol*	Lignans	24404-50-0	106779±9220	159752±8138	153499±12606	162495±2212	165707±26962	193877±30549	0.106
705	339.072	177.019	340.079	C15H16O9	[M-H]-	Esculin*	Coumarins	531-75-9	169882±24280	276526±22811	284990±10522	222000±32969	261564±34077	245896±6681	0.039
706	147.044	103.054	146.037	C9H6O2	[M+H]+	Coumarin	Coumarins	91-64-5	349586±43120	409443±27936	355092±15780	260665±30700	273567±18617	304231±11131	0.019
707	385.113	223.06	384.106	C17H20O10	[M+H]+	Isofraxidin-7-O-glucoside	Coumarins	483-91-0	42513±4340	59739±6167	51699±7129	36926±8007	42354±2355	44436±2331	0.034
708	177.055	121.065	176.047	C10H8O3	[M+H]+	7-Methoxycoumarin	Coumarins	531-59-9	603436±41842	1044197±38629	727998±62849	415312±17329	428129±7937	628715±38943	0.011
709	339.074	177.023	340.079	C15H16O9	[M-H]-	Esculetin-7-O-glucoside*	Coumarins	-	188832±15091	273484±37079	284352±42236	229279±13624	242518±17325	305837±54683	0.025
710	299.202	299.202	300.209	C20H28O2	[M-H]-	Dehydroabietic acid	Terpenoids	1740-19-8	146379±30721	134464±8689	156326±30216	202801±47835	211325±69482	219516±2697	0.145
711	221.189	105.07	220.183	C15H24O	[M+H]+	Santalol	Terpenoids	11031-45-1	68284±15226	63139±5439	77602±2140	69417±5449	65724±11044	75554±1718	0.347
712	421.135	169.051	422.142	C17H26O12	[M-H]-	Acetylcatalpol	Terpenoids	-	1216305±801144	2399728±477675	2121235±236261	1653796±571412	2086764±574968	1992157±117875	0.225
713	233.155	233.155	234.162	C15H22O2	[M-H]-	Confertifoline	Terpenoids	1811-23-0	1080086±15776	1158390±37032	1189038±12820	1163871±137527	1128050±201468	1240721±188503	0.498
714	523.181	177.055	522.174	C25H30O12	[M+H]+	6-O-p-Methoxycinnamoylcatalpol	Terpenoids	121710-02-9	65821±26138	63342±9837	92861±39685	39497±4423	73098±14910	45617±8147	0.075
715	503.338	441.337	504.345	C30H48O6	[M-H]-	1,2,3,19-Tetrahydroxyurs-12-en-28-oic acid	Terpenoids	120211-98-5	12404±4664	3571±1638	13433±504	3879±2060	4606±971	7664±1700	0.035
716	359.135	197.08	360.142	C16H24O9	[M-H]-	7-Deoxyloganic acid	Terpenoids	22487-36-1	19989±4899	20299±8439	22680±8744	17320±3009	19984±6061	33594±9889	0.943
717	153.127	107.085	152.12	C10H16O	[M+H]+	Perillyl alcohol	Terpenoids	57717-97-2	407127±52069	345325±95150	746283±299493	508731±107322	565385±222767	499177±234914	0.139
718	218.109	88.0433	219.111	C9H17NO5	[M-H]-	D-Pantothenic Acid	Vitamins	79-83-4	1008049±56882	1563337±53963	1433296±36347	1425353±43658	1494069±71811	1660516±13654	0.026
719	173.009	71.0341	174.016	C6H6O6	[M-H]-	Dehydroascorbic acid	Vitamins	490-83-5	70511±41647	301914±27479	236310±44052	453810±27703	391803±75012	143167±1373	0.013
720	168.065	150.054	167.058	C8H9NO3	[M+H]+	Pyridoxal	Vitamins	66-72-8	55396±5576	51868±14763	41995±18682	33346±8758	37486±1699	46612±1332	0.261
721	123.055	80.0494	122.048	C6H6N2O	[M+H]+	Nicotinamide	Vitamins	98-92-0	993853±60825	2180429±120917	2188289±108917	2361978±228616	4234483±348706	2523663±87365	0.022
722	286.092	124.039	285.085	C12H15NO7	[M+H]+	N-(beta-D-Glucosyl)nicotinate	Vitamins	-	177303±13685	202251±25568	225236±67755	175847±8425	172274±8096	189009±8997	0.246
723	155.01	111.02	156.017	C5H4N2O4	[M-H]-	Orotic acid (Vitamin B13)	Vitamins	65-86-1	636619±83363	942578±43637	974702±60054	1777754±144869	1525719±67485	1246739±80969	0.011
724	256.082	124.039	256.082	C11H14NO6+	[M]+	Nicotinate D-ribonucleoside	Vitamins	17720-18-2	1234992±178160	1215383±63592	1350086±205561	1354624±69794	1640868±320445	1295578±108981	0.202
725	124.039	78.0347	123.032	C6H5NO2	[M+H]+	Nicotinic acid (Vitamin B3)	Vitamins	59-67-6	192460±8702	191820±18269	195963±12522	253453±9260	235221±17258	219937±26233	0.029
726	377.146	243.088	376.138	C17H20N4O6	[M+H]+	Riboflavin (Vitamin B2)	Vitamins	83-88-5	288337±148767	439349±97163	360187±47731	647548±359535	427804±11326	411665±56017	0.243
727	445.31	341.284	444.303	C31H40O2	[M+H]+	Menatetrenone (Vitamin K2)	Vitamins	11032-49-8	53741±10068	49719±7595	55775±9118	54725±4556	60331±12935	115868±19371	0.884
728	332.134	152.072	331.127	C14H21NO8	[M+H]+	Pyridoxine-5'-O-glucoside	Vitamins	-	21843±3790	13678±919	18552±3370	19560±4644	20991±3414	18801±4419	0.098
729	184.06	148.039	183.053	C8H9NO4	[M+H]+	4-Pyridoxic acid	Vitamins	82-82-6	51846±4647	72747±6090	50553±11563	57704±1664	42251±6191	50749±13538	0.034
730	170.081	134.06	169.074	C8H11NO3	[M+H]+	Pyridoxine	Vitamins	65-23-6	150437±7840	119048±46551	154278±46041	168233±11991	183297±21585	124200±46000	0.122
731	303.04	257.045	302.043	C15H10O7	[M+H]+	3,5,7,4'-Tetrahydroxy-Coumaronochromone	Others	-	213658±51532	285898±42767	292632±45487	351259±29100	388985±35840	277486±36173	0.041
732	163.039	107.05	162.032	C9H6O3	[M+H]+	7-Hydroxy-4-chromone	Others	59887-89-7	18824±4063	35441±9132	29900±7482	32235±11362	15677±5748	30668±13485	0.077
733	130.091	84.0806	129.09	C5H11N3O	[M+H]+	4-Guanidinobutanal	Others	-	15680241±708441	17259868±5533056	18819437±10852493	26644947±741539	20820276±7256224	22303075±5945870	0.112
734	283.024	255.027	284.032	C15H8O6	[M-H]-	Rheic Acid	Others	478-43-3	20684±1216	65590±8834	58406±578	71850±3028	73266±3563	53350±6667	0.03
735	239.071	223.032	240.079	C15H12O3	[M-H]-	Chrysophanol-9-anthrone	Others	491-58-7	808608±181592	1077946±300787	1108277±541973	1135612±232249	1399332±58889	6327616±2294512	0.217
Note: the data was shown as mean ± SD with peak area (n=3); the P-Value was calculated by Tukey s-b(K) test. "*" indicates the presence of isomers of the substance.
