# Supplementary material for: Dynamic Changes in Non-Volatile Components during Steamed Green Tea Manufacturing Based on Widely Targeted Metabolomic Analysis
Source: Foods. 2023 Apr 6;12(7):1551. doi: 10.3390/foods12071551 (PMC10094149; doi:10.3390/foods12071551)
Supplement: Supplementary file 1 [file foods-12-01551-s001.zip › Supplementary Materials-Table S2.xlsx]

## Sheet: Sheet1
Table S2: List of 256 significant changed compounds and their P-values, fold changes (FC), and log2FCs during each processing step
NO.	Compounds	Class I	WTL-1	WTL-2	WTL-3	FTL-1	FTL-2	FTL-3	RTL-1	RTL-2	RTL-3	STL-1	STL-2	STL-3	DTL-1	DTL-2	DTL-3	kegg_map	FTL_vs_RTL_VIP	FTL_vs_RTL_P-value	FTL_vs_RTL_Fold_Change	FTL_vs_RTL_Log2FC	FTL_vs_RTL_Type	RTL_vs_STL_VIP	RTL_vs_STL_P-value	RTL_vs_STL_Fold_Change	RTL_vs_STL_Log2FC	RTL_vs_STL_Type	STL_vs_DTL_VIP	STL_vs_DTL_P-value	STL_vs_DTL_Fold_Change	STL_vs_DTL_Log2FC	STL_vs_DTL_Type	WTL_vs_FTL_VIP	WTL_vs_FTL_P-value	WTL_vs_FTL_Fold_Change	WTL_vs_FTL_Log2FC	WTL_vs_FTL_Type
1	N-Monomethyl-L-arginine	Amino acids and derivatives	5.32483e+06	5.71994e+06	5.84097e+06	8.41182e+06	8.54095e+06	8.23648e+06	6.90649e+06	6.66969e+06	6.62519e+06	7.50141e+06	7.21589e+06	7.11927e+06	5.86012e+06	5.98834e+06	6.42195e+06	-	1.65704	0.000179753	0.801983	-0.318356	down	--	--	--	--	--	--	--	--	--	--	1.28288	0.000437382	1.49175	0.577003	up
2	Homoarginine	Amino acids and derivatives	921199	1.01433e+06	1.04713e+06	1.61437e+06	1.63934e+06	1.43589e+06	1.25636e+06	1.21819e+06	1.19994e+06	1.36472e+06	1.23647e+06	1.29159e+06	1.28865e+06	1.17546e+06	1.24255e+06	-	--	--	--	--	--	--	--	--	--	--	--	--	--	--	--	1.25829	0.00352614	1.57229	0.652865	up
3	N-Ethylglycine	Amino acids and derivatives	1.26485e+07	1.25312e+07	1.22281e+07	5.8171e+06	5.72008e+06	5.22703e+06	5.07565e+06	5.95987e+06	5.33935e+06	6.90217e+06	6.84697e+06	6.30708e+06	5.91298e+06	5.63599e+06	5.92325e+06	-	--	--	--	--	--	--	--	--	--	--	--	--	--	--	--	1.29195	1.92144e-05	0.448148	-1.15795	down
4	N,N-Dimethylglycine*	Amino acids and derivatives	1.34066e+07	1.19677e+07	1.27634e+07	6.82701e+06	6.5241e+06	6.02249e+06	5.6591e+06	5.64449e+06	6.05375e+06	6.4057e+06	6.78289e+06	6.71044e+06	6.85758e+06	6.11951e+06	6.13072e+06	ko00260,ko01100	--	--	--	--	--	--	--	--	--	--	--	--	--	--	--	1.28333	0.00074415	0.50799	-0.977128	down
5	N,N'-Dimethylarginine;SDMA*	Amino acids and derivatives	1.08468e+06	1.00667e+06	1.01746e+06	1.48617e+06	1.38765e+06	1.30642e+06	1.16214e+06	1.18835e+06	1.31644e+06	1.33507e+06	1.35888e+06	1.15787e+06	1.40753e+06	1.30241e+06	1.29058e+06	-	--	--	--	--	--	--	--	--	--	--	--	--	--	--	--	1.244	0.00981129	1.34464	0.427221	up
6	Methyl 3-aminopropanoate	Amino acids and derivatives	1.37672e+07	1.31868e+07	1.29988e+07	6.91445e+06	6.67266e+06	5.7909e+06	5.27063e+06	5.7867e+06	6.23023e+06	6.59039e+06	7.35333e+06	6.39756e+06	6.80968e+06	5.84543e+06	6.52404e+06	-	--	--	--	--	--	--	--	--	--	--	--	--	--	--	--	1.28096	0.000181012	0.485021	-1.04388	down
7	L-threo-3-Methylaspartate	Amino acids and derivatives	941099	925682	854746	1.13464e+06	1.21446e+06	1.17159e+06	1.36487e+06	1.34345e+06	1.37927e+06	1.59288e+06	1.69102e+06	1.66464e+06	1.83245e+06	1.77012e+06	1.73035e+06	ko00630,ko00660,ko01100,ko01200	--	--	--	--	--	1.54954	0.00544655	1.21062	0.275751	up	--	--	--	--	--	1.25012	0.00176783	1.29365	0.371444	up
8	Homoproline	Amino acids and derivatives	1.00964e+08	1.37445e+08	7.81441e+07	5.27344e+07	6.76479e+07	6.94997e+07	6.44746e+07	7.11929e+07	5.73303e+07	2.99844e+07	3.46021e+07	32470857	4.15565e+07	4.04549e+07	4.83441e+07	-	--	--	--	--	--	1.54447	0.00942755	0.502894	-0.991674	down	--	--	--	--	--	--	--	--	--	--
9	L-Histidine	Amino acids and derivatives	4.91062e+06	4.59279e+06	4.97938e+06	6.5529e+06	7.07042e+06	6.32582e+06	5.82777e+06	5.47445e+06	7.03295e+06	6.87158e+06	5.61341e+06	5.47036e+06	5.13582e+06	4.52769e+06	5.06337e+06	ko00340,ko00410,ko00470,ko00970,ko01100,ko01110,ko01230,ko02010	--	--	--	--	--	--	--	--	--	--	--	--	--	--	--	1.25559	0.00492186	1.37744	0.461988	up
10	N-α-Acetyl-L-ornithine	Amino acids and derivatives	3.2357e+06	3.8373e+06	3.68731e+06	5.11721e+06	5.56724e+06	5.55603e+06	4.48788e+06	4.33471e+06	4.45068e+06	5.00835e+06	4.67225e+06	4.85815e+06	4.33994e+06	4.16942e+06	4.42041e+06	ko00220,ko01100,ko01110,ko01210,ko01230	--	--	--	--	--	--	--	--	--	--	--	--	--	--	--	1.24776	0.00168862	1.50929	0.593875	up
11	L-Phenylalanine	Amino acids and derivatives	8.76365e+06	9.37823e+06	9.26323e+06	1.34019e+07	1.30364e+07	1.34336e+07	1.07705e+07	1.18798e+07	1.16316e+07	1.10932e+07	1.20976e+07	1.1894e+07	1.42224e+07	1.40445e+07	1.35395e+07	ko00360,ko00400,ko00460,ko00470,ko00940,ko00960,ko00966,ko00970,ko00996,ko00999,ko01100,ko01110,ko01210,ko01230,ko02010	--	--	--	--	--	--	--	--	--	--	--	--	--	--	--	1.28759	0.000132119	1.45491	0.540926	up
12	Glycylphenylalanine*	Amino acids and derivatives	346085	443636	435717	779088	909396	901454	633675	652294	785238	546388	503428	568950	566168	433520	477189	-	--	--	--	--	--	--	--	--	--	--	--	--	--	--	--	1.25766	0.0013942	2.11348	1.07962	up
13	Glu-Phe	Amino acids and derivatives	7.326e+06	6.91931e+06	7.62932e+06	4.78797e+06	4.65107e+06	5.44168e+06	5.59743e+06	5.88527e+06	4.83487e+06	3.54915e+06	3.67975e+06	3.72878e+06	3.97173e+06	4.21671e+06	4.81368e+06	-	--	--	--	--	--	--	--	--	--	--	--	--	--	--	--	1.24681	0.00207991	0.680273	-0.555814	down
14	L-Tryptophan	Amino acids and derivatives	1.16526e+07	1.32357e+07	1.3767e+07	1.80034e+07	2.03996e+07	1.90638e+07	1.82096e+07	1.71064e+07	1.88745e+07	1.55472e+07	1.8081e+07	1.70335e+07	1.7951e+07	1.79636e+07	1.8414e+07	ko00260,ko00380,ko00400,ko00901,ko00966,ko00970,ko00996,ko01100,ko01110,ko01210,ko01230,ko01240	--	--	--	--	--	--	--	--	--	--	--	--	--	--	--	1.23786	0.00269788	1.48665	0.572061	up
15	L-Alanyl-L-Phenylalanine	Amino acids and derivatives	37162.4	59535.3	37021.4	147253	129561	141245	155262	142915	107453	106743	138011	136415	130118	118059	122454	-	--	--	--	--	--	--	--	--	--	--	--	--	--	--	--	1.25021	0.000856654	3.12639	1.6445	up
16	L-Seryl-L-Isoleucine	Amino acids and derivatives	70992.5	84780.7	76580.6	206186	219475	196179	207100	227476	205425	209982	171053	199331	187458	190169	175717	-	--	--	--	--	--	--	--	--	--	--	--	--	--	--	--	1.2875	0.000298328	2.67626	1.42022	up
17	L-Glycyl-L-phenylalanine*	Amino acids and derivatives	407597	424649	406128	760826	803462	819847	659301	594648	732819	548107	571318	588866	497672	417944	415971	-	--	--	--	--	--	--	--	--	--	--	--	--	--	--	--	1.29263	0.000832306	1.92522	0.94502	up
18	L-Prolyl-L-Phenylalanine	Amino acids and derivatives	118770	128948	120771	222825	241407	261567	218803	207471	255850	163049	176000	171654	197661	144812	143038	-	--	--	--	--	--	--	--	--	--	--	--	--	--	--	--	1.28123	0.00564822	1.96966	0.977948	up
19	L-Tyrosine methyl ester	Amino acids and derivatives	394292	374039	373134	121410	119102	95837.2	106676	113789	120844	88865.2	95000.9	89528	102563	108422	110549	-	--	--	--	--	--	--	--	--	--	--	--	--	--	--	--	1.28636	1.88717e-05	0.294664	-1.76286	down
20	L-Valyl-L-Phenylalanine	Amino acids and derivatives	189757	180781	171882	326007	368242	345190	296066	336889	376387	303827	277757	315765	361858	290819	325880	-	--	--	--	--	--	--	--	--	--	--	--	--	--	--	--	1.28435	0.00184211	1.9163	0.938325	up
21	L-Valyl-L-Leucine	Amino acids and derivatives	347774	349214	305908	699926	589920	630432	622620	632109	664350	690114	625176	689064	552286	635928	615328	-	--	--	--	--	--	--	--	--	--	--	--	--	--	--	--	1.2717	0.00440948	1.91473	0.937142	up
22	L-Leucyl-L-Leucine	Amino acids and derivatives	269487	252845	302320	489893	501233	493937	317560	527739	405212	489103	342618	418604	366019	417307	443871	-	--	--	--	--	--	--	--	--	--	--	--	--	--	--	--	1.27645	0.00299682	1.80084	0.848666	up
23	L-Homomethionine	Amino acids and derivatives	816322	687311	666501	1.79737e+06	1.70055e+06	1.44889e+06	4.9557e+06	4.68349e+06	5.17928e+06	1.1992e+06	1.21637e+06	1.06119e+06	944387	891773	966718	ko00966,ko01110,ko01210	1.66271	9.57749e-05	2.99556	1.58283	up	1.57677	0.000504039	0.234623	-2.09158	down	--	--	--	--	--	1.26744	0.00511656	2.2795	1.18872	up
24	N-Acetyl-L-glutamic acid	Amino acids and derivatives	302525	279461	323493	492995	487979	425136	539070	450552	561769	622921	570860	715216	553986	574762	686571	ko00220,ko01100,ko01110,ko01210,ko01230	--	--	--	--	--	--	--	--	--	--	--	--	--	--	--	1.24586	0.00566781	1.55289	0.634956	up
25	N-Acetyl-L-Methionine	Amino acids and derivatives	17194.4	22889.5	15035.6	73613.6	62147.2	81804.5	49308.8	36469.5	53707.7	39221.5	46994.4	58709.3	40515.9	32920.1	31631.9	-	--	--	--	--	--	--	--	--	--	--	--	--	--	--	--	1.26884	0.00490623	3.94716	1.98081	up
26	N(6),N(6)-Dimethyl-L-lysine	Amino acids and derivatives	1.47076e+06	1.97608e+06	2.22167e+06	3.53644e+06	4.05479e+06	3.60824e+06	3.41345e+06	2.83336e+06	2.41373e+06	2.34163e+06	2.15911e+06	2.01419e+06	1.40056e+06	9	2.14759e+06	-	--	--	--	--	--	--	--	--	--	--	--	--	--	--	--	1.21439	0.00345086	1.97573	0.982388	up
27	Kaempferol-3-O-(6''-p-Coumaroyl)galactoside*	Flavonoids	2.46714e+06	2.76862e+06	2.53763e+06	1.52451e+06	1.66745e+06	1.72469e+06	2.57413e+06	2.82305e+06	2.52926e+06	2.60418e+06	2.41563e+06	2.34623e+06	2.3134e+06	2.55557e+06	2.09066e+06	-	1.64007	0.00153632	1.61216	0.688997	up	--	--	--	--	--	--	--	--	--	--	1.26688	0.00179651	0.632498	-0.660866	down
28	Myricetin-3-O-galactoside*	Flavonoids	5.08681e+06	5.51564e+06	5.35961e+06	7.42024e+06	7.16976e+06	6.62711e+06	5.05663e+06	4.86065e+06	5.91498e+06	5.25634e+06	6.30077e+06	5.71813e+06	6.23342e+06	5.69176e+06	5.97472e+06	-	--	--	--	--	--	--	--	--	--	--	--	--	--	--	--	1.24716	0.00666853	1.32922	0.410581	up
29	Quercetin-3-O-neohesperidoside*	Flavonoids	1.48051e+07	1.40006e+07	1.62699e+07	3.13063e+07	2.79909e+07	2.84374e+07	2.43439e+07	2.44555e+07	2.11803e+07	2.08199e+07	2.01396e+07	1.91478e+07	1.97436e+07	2.09383e+07	2.04334e+07	-	--	--	--	--	--	--	--	--	--	--	--	--	--	--	--	1.27919	0.000761282	1.94639	0.960799	up
30	Luteolin-7-O-(6''-caffeoyl)rhamnoside	Flavonoids	657710	694110	708820	515629	527766	483391	906064	936910	924435	908174	815207	974554	1.00572e+06	1.02607e+06	1.08552e+06	-	1.66886	3.89048e-05	1.81257	0.858039	up	--	--	--	--	--	--	--	--	--	--	1.26384	0.000986916	0.740928	-0.432595	down
31	Luteolin-7-O-Sophoroside-5-O-arabinoside	Flavonoids	315294	760005	409056	5.21816e+06	5.0908e+06	4.57769e+06	2.06133e+06	1345005	2.42441e+06	326776	560005	259089	610005	399063	366260	-	1.56921	0.00265188	0.391676	-1.35227	down	--	--	--	--	--	--	--	--	--	--	1.26663	0.000109773	10.029	3.32611	up
32	Myricetin-3-O-β-D-glucoside*	Flavonoids	4.83183e+06	5.51401e+06	5.17535e+06	7.06934e+06	7.64197e+06	6.65221e+06	5.06233e+06	5.12822e+06	5920783	6.03624e+06	5.70526e+06	6.87155e+06	5.5786e+06	5.94618e+06	5.82703e+06	-	--	--	--	--	--	--	--	--	--	--	--	--	--	--	--	1.22592	0.00712586	1.37641	0.46091	up
33	Quercetin-3-O-(2''-O-Rhamnosyl)rutinoside	Flavonoids	1.94931e+06	2.61762e+06	2.12091e+06	3.13668e+07	3.17529e+07	3.45486e+07	1.56314e+07	1.58406e+07	1.81389e+07	2.57888e+06	2.40984e+06	2.82863e+06	2.8361e+06	2.7607e+06	3.13442e+06	-	1.65367	0.000310861	0.507953	-0.977232	down	1.57678	0.00277057	0.157573	-2.6659	down	--	--	--	--	--	1.29402	0.000735728	14.6038	3.86828	up
34	Quercetin-3-O-(6''-O-p-Coumaroyl)galactoside	Flavonoids	498866	519733	469342	233568	197806	218340	449377	393574	432772	299584	300509	351879	408698	403610	344720	-	1.64872	0.00103904	1.96351	0.973438	up	--	--	--	--	--	--	--	--	--	--	1.28466	0.000193985	0.436653	-1.19544	down
35	1,2,4,5,8-pentahydroxy-6-methylanthracene-9,10-dione	Flavonoids	242318	289655	262447	683740	681429	785083	787810	860487	932644	1.33857e+06	1.3585e+06	1.35382e+06	1.63271e+06	1.6656e+06	1.83786e+06	-	--	--	--	--	--	1.54518	0.00633432	1.56954	0.650343	up	--	--	--	--	--	1.2845	0.00215498	2.70669	1.43653	up
36	Kaempferol-3-O-(6''-Rhamnosyl-2''-Glucosyl)Glucoside (Camelliaside A)	Flavonoids	2.5508e+06	2.73891e+06	2.63315e+06	2.20592e+06	2.26606e+06	2.01003e+06	2.55392e+06	2.5403e+06	2.32105e+06	2.51859e+06	2.64786e+06	2.28586e+06	2.64042e+06	2.48565e+06	2.2601e+06	-	--	--	--	--	--	--	--	--	--	--	--	--	--	--	--	1.19736	0.00938624	0.818141	-0.289579	down
37	Cyanidin-3-O-glucoside (Kuromanin)	Flavonoids	4.29365e+06	4.14364e+06	4.02791e+06	2.71188e+06	2.63059e+06	2.56621e+06	3.48584e+06	3.83182e+06	3.54071e+06	2.86468e+06	3.52809e+06	3.1958e+06	3.26998e+06	3.06397e+06	3.696e+06	ko00942,ko01110	1.63944	0.00570706	1.37297	0.457299	up	--	--	--	--	--	--	--	--	--	--	1.28931	0.000344653	0.634461	-0.656398	down
38	Quercetin-3-O-rutinoside-7-O-rhamnoside	Flavonoids	1.91788e+06	2.26536e+06	1.82032e+06	3.05195e+07	2.93569e+07	3.70974e+07	1.46143e+07	33219125	1.78672e+07	2.30615e+06	2.15987e+06	2.10037e+06	2.9766e+06	2.45733e+06	2.89057e+06	-	--	--	--	--	--	--	--	--	--	--	--	--	--	--	--	1.29383	0.00612938	16.1527	4.01371	up
39	5,7,8,4'-Tetramethoxyflavone	Flavonoids	16955.6	12974.5	67240.6	6465.05	8019.32	6184.55	22196.5	14459.9	16733.7	11793.4	11807.5	11579.2	7849.81	6610.15	7507.89	-	--	--	--	--	--	--	--	--	--	--	1.67907	0.00544645	0.62444	-0.679366	down	--	--	--	--	--
40	Kaempferol-3-O-(2''-p-Coumaroyl)galactoside	Flavonoids	492277	541754	457183	511202	460225	501935	642231	697423	619814	607254	549971	605857	571301	571720	545517	-	1.58866	0.00640538	1.32993	0.411349	up	--	--	--	--	--	--	--	--	--	--	--	--	--	--	--
41	Kaempferol-3-O-(6'''-p-Coumaroyl)glucosyl-(1→2)-Glucoside-7-O-Rhamnoside	Flavonoids	287332	368159	346537	25664.1	18771.3	24028.9	209955	236864	203246	87044.1	37032.3	62658.2	32599.5	43574.8	20350.7	-	1.66867	0.00201575	9.49494	3.24716	up	1.4744	0.00149429	0.287255	-1.79959	down	--	--	--	--	--	1.29161	0.00568693	0.0683258	-3.87143	down
42	Myricetin-3-O-xyloside*	Flavonoids	170195	186945	212174	284894	272221	258843	339956	368347	341500	420188	378408	349135	502154	509842	533470	-	1.60416	0.00321653	1.28659	0.363552	up	--	--	--	--	--	--	--	--	--	--	1.2114	0.00787129	1.43323	0.519272	up
43	Tricetin (5,7,3',4',5'-Pentahydroxyflavone)	Flavonoids	233471	267390	248871	327071	359644	316296	413576	390700	339988	353050	361169	324793	504449	426738	415713	ko00941	--	--	--	--	--	--	--	--	--	--	--	--	--	--	--	1.2139	0.00807695	1.33782	0.419889	up
44	Pinocembrin-7-O-glucoside (Pinocembroside)	Flavonoids	143410	138816	145414	125864	131732	118193	152897	149579	161568	350576	302549	334262	244370	276999	317782	-	1.57368	0.0053011	1.23485	0.304336	up	1.56761	0.00433694	2.12779	1.08935	up	--	--	--	--	--	--	--	--	--	--
45	Kaempferol (3,5,7,4'-Tetrahydroxyflavone)	Flavonoids	96295.6	106059	112309	314033	325658	353479	315717	321193	319471	399464	358378	363991	411096	379936	384951	ko00941,ko00944,ko01100,ko01110	--	--	--	--	--	--	--	--	--	--	--	--	--	--	--	1.2905	0.000816317	3.15629	1.65823	up
46	Vitexin-7-O-(6''-p-coumaroyl)glucoside	Flavonoids	122505	76875.3	46772.5	779426	861926	957670	368923	310368	350151	39566.3	33354.4	48022.9	65758.8	54944.9	67505	-	1.65221	0.00529691	0.396088	-1.33611	down	1.57147	0.00203894	0.117485	-3.08946	down	--	--	--	--	--	1.26287	0.00132559	10.5586	3.40034	up
47	Catechin-5-O-glucoside	Flavonoids	105202	138638	147731	185724	187557	195935	215344	208670	236424	165666	151014	160346	191405	199011	188686	-	--	--	--	--	--	1.52018	0.00751748	0.722286	-0.469358	down	1.63499	0.00410983	1.21399	0.279752	up	--	--	--	--	--
48	Kaempferol-3-O-(6''-malonyl)glucoside*	Flavonoids	7.34679e+06	7.41901e+06	7.01249e+06	1.66091e+07	1.72041e+07	1.92458e+07	1.27659e+07	1.22244e+07	1.08541e+07	7.95569e+06	8.59047e+06	8.64958e+06	8.71433e+06	8.81545e+06	8.65176e+06	-	1.58927	0.00579643	0.675559	-0.565847	down	--	--	--	--	--	--	--	--	--	--	1.28938	0.00494037	2.43632	1.2847	up
49	7-Methoxy-3-[1-(3-pyridyl)methylidene]-4-chromanone	Flavonoids	7.5796e+06	7.10907e+06	7.13042e+06	4.35275e+07	4.33676e+07	3.8956e+07	4.57663e+07	4.19691e+07	4.61536e+07	5.13079e+07	5.62844e+07	5.43294e+07	5.79018e+07	5.36404e+07	4.62408e+07	-	--	--	--	--	--	1.4552	0.00914718	1.20937	0.274259	up	--	--	--	--	--	1.29566	0.00169438	5.76793	2.52805	up
50	Kaempferol-3-O-arabinoside (Juglanin)	Flavonoids	38183.8	54680.2	70639.9	68455.6	78397.4	91322.8	136188	126499	133832	144283	146117	164856	166485	191804	187107	-	1.59032	0.00709706	1.66482	0.735365	up	--	--	--	--	--	--	--	--	--	--	--	--	--	--	--
51	Apigenin-6-C-glucoside (Isovitexin)*	Flavonoids	2.93401e+06	3.24833e+06	3.15691e+06	5.04471e+06	4.10014e+06	8559790	5.3467e+06	5.44188e+06	3.88992e+06	8882465	8013050	9124990	12286195	6.34271e+06	7.23353e+06	ko00944	--	--	--	--	--	1.46809	0.00515813	1.77269	0.825944	up	--	--	--	--	--	--	--	--	--	--
52	Apigenin-8-C-Glucoside (Vitexin)*	Flavonoids	2.93401e+06	3.24833e+06	3.15691e+06	5.04471e+06	4.10014e+06	8559790	5.3467e+06	5.44188e+06	3.88992e+06	8882465	8013050	9124990	12286195	6.34271e+06	7.23353e+06	ko00941,ko00944	--	--	--	--	--	1.46809	0.00515813	1.77269	0.825944	up	--	--	--	--	--	--	--	--	--	--
53	Kaempferol-3-O-(2''-O-acetyl)glucoside	Flavonoids	2.40152e+06	2.56408e+06	2.67772e+06	1.96525e+06	1.83823e+06	2.19174e+06	2.59339e+06	2.55485e+06	2.60753e+06	3.15779e+06	3.35833e+06	3.23266e+06	3.38736e+06	2.64657e+06	2.87635e+06	-	--	--	--	--	--	1.55993	0.00501753	1.25697	0.329953	up	--	--	--	--	--	--	--	--	--	--
54	Pelargonidin-3-O-glucoside	Flavonoids	960748	926633	1.06165e+06	733878	719198	748391	713622	639411	757289	465637	386436	484907	590385	642560	715908	ko00942,ko01100,ko01110	--	--	--	--	--	1.48063	0.00513425	0.633543	-0.658486	down	--	--	--	--	--	--	--	--	--	--
55	Luteolin-7-O-(6''-malonyl)glucoside*	Flavonoids	7.47282e+06	8.51628e+06	7.37884e+06	1.36183e+07	1.54443e+07	1.6507e+07	1.00891e+07	1.34118e+07	9.62588e+06	8.46078e+06	9.01651e+06	8.76882e+06	9.25509e+06	9.50316e+06	8.54006e+06	-	--	--	--	--	--	--	--	--	--	--	--	--	--	--	--	1.26692	0.00565128	1.95009	0.963542	up
56	Isovitexin-2''-O-xyloside*	Flavonoids	554584	559182	676925	906319	884355	787214	756468	1.07559e+06	854623	1.06564e+06	1.03175e+06	1.03005e+06	1.114e+06	1.14256e+06	1.33465e+06	-	--	--	--	--	--	--	--	--	--	--	--	--	--	--	--	1.1931	0.00858494	1.43961	0.525674	up
57	Diosmetin-7-O-glucoside*	Flavonoids	358403	452998	466291	578528	566113	582391	466915	468982	455371	464920	378732	519504	476421	396498	516905	-	1.66529	7.68733e-05	0.805584	-0.311893	down	--	--	--	--	--	--	--	--	--	--	--	--	--	--	--
58	4',5,7-Trihydroxy-3',6-dimethoxyflavone (Jaceosidin)	Flavonoids	48955.2	55489	45454.6	62625.6	66327.5	74471.8	72090.5	68580.9	73176.3	50082.5	53331.1	46050.6	48475	48404.8	45319	-	--	--	--	--	--	1.52963	0.00193833	0.698928	-0.516784	down	--	--	--	--	--	--	--	--	--	--
59	Kaempferol-3-O-(6''-galloyl)galactoside	Flavonoids	1.48902e+06	1.66769e+06	1.74488e+06	448914	495501	882505	1.33338e+06	1.55631e+06	1.27356e+06	1.06917e+06	953294	895326	1.0891e+06	1.44476e+06	1.02979e+06	-	--	--	--	--	--	--	--	--	--	--	--	--	--	--	--	1.19753	0.00650435	0.37272	-1.42384	down
60	Quercetin-3-O-rutinoside (Rutin)	Flavonoids	1.0122e+06	788149	1.20435e+06	2.53465e+06	2.27989e+06	2.75431e+06	2.21012e+06	2.18754e+06	2.30589e+06	1.81032e+06	1.88722e+06	2.21004e+06	1.83346e+06	2.17098e+06	1.88135e+06	ko00944,ko01100,ko01110	--	--	--	--	--	--	--	--	--	--	--	--	--	--	--	1.24581	0.00121326	2.51901	1.33286	up
61	Naringenin-7-O-glucoside (Prunin)	Flavonoids	183226	166657	220671	299594	361011	299925	428216	469604	487076	482471	458541	659533	474449	492008	595185	ko00941	1.55865	0.00665384	1.4418	0.527876	up	--	--	--	--	--	--	--	--	--	--	1.20592	0.0085849	1.6835	0.751466	up
62	Quercetin-3-O-(6''-O-galloyl)galactoside	Flavonoids	122505	86111.1	104507	33435.1	32532.1	25978	103715	80110.1	98155.9	39628.1	65508.1	44567.1	79443.4	75356.6	79423.9	-	1.64439	0.00739447	3.06684	1.61675	up	--	--	--	--	--	--	--	--	--	--	--	--	--	--	--
63	Kaempferol-3-O-(6''-malonyl)galactoside*	Flavonoids	6.23652e+06	5.5602e+06	5.92121e+06	1.40826e+07	1.58532e+07	1.76782e+07	1.09346e+07	9.8908e+06	1.10079e+07	6.40526e+06	6.90997e+06	8.70973e+06	8.13447e+06	6.70276e+06	9.29109e+06	-	--	--	--	--	--	--	--	--	--	--	--	--	--	--	--	1.28219	0.00882485	2.68734	1.42618	up
64	Kaempferol-3-O-(4''-p-coumaroyl)rhamnoside	Flavonoids	90031.3	94194.5	96774.2	53732.6	58617.9	59207.6	96476.2	104186	102697	85785.4	85510.8	91038	103522	99815	102874	-	1.66071	0.000198917	1.76826	0.82233	up	--	--	--	--	--	--	--	--	--	--	1.28301	0.000169792	0.610527	-0.711873	down
65	5-Hydroxy-6,7,3',4'-tetramethoxyflavone	Flavonoids	571616	590577	599801	862970	900632	994618	587709	545268	556700	224734	191187	185062	230396	279005	230099	-	1.645	0.00711935	0.612597	-0.70699	down	1.56906	3.35206e-05	0.355679	-1.49135	down	--	--	--	--	--	--	--	--	--	--
66	Epicatechin-epiafzelechin	Flavonoids	34291.7	30395.4	34540.6	33587.7	41490.4	50691.2	53893.7	38811.2	53588.7	67389.2	73277.7	81343.4	47565.9	53605.7	41187.2	-	--	--	--	--	--	--	--	--	--	--	1.58559	0.00826979	0.641226	-0.641095	down	--	--	--	--	--
67	Tricin (5,7,4'-Trihydroxy-3',5'-dimethoxyflavone)	Flavonoids	100657	97582.7	108416	126914	122442	132142	134720	149679	138459	105534	107769	103528	104100	115746	103826	-	--	--	--	--	--	--	--	--	--	--	--	--	--	--	--	1.22379	0.00454706	1.24405	0.315049	up
68	Quercetin-3-O-glucoside (Isoquercitrin)*	Flavonoids	6.06082e+06	6.19884e+06	5.46834e+06	6.91152e+06	6.10306e+06	5.87141e+06	6.04431e+06	5.64671e+06	6.22327e+06	7.13783e+06	7.05061e+06	7.38914e+06	6.63662e+06	6.99952e+06	8.22007e+06	ko00944,ko01100,ko01110	--	--	--	--	--	1.49608	0.00673044	1.20449	0.268423	up	--	--	--	--	--	--	--	--	--	--
69	Kaempferol-3-O-(6''-O-acetyl)glucoside	Flavonoids	212331	300420	295275	831915	940040	969106	697045	592415	531627	404067	317307	433538	434254	476536	497742	-	1.53157	0.00908566	0.664373	-0.589934	down	--	--	--	--	--	--	--	--	--	--	1.27206	0.000442589	3.3923	1.76226	up
70	Diosmetin-7-O-galactoside*	Flavonoids	361060	375167	428867	687979	563365	642945	480839	486090	431880	508168	381516	514099	529851	405368	421116	-	--	--	--	--	--	--	--	--	--	--	--	--	--	--	--	1.23439	0.00876067	1.62587	0.70121	up
71	Kaempferol-3-O-sophoroside-7-O-glucoside	Flavonoids	131582	74008.3	64540	97377.6	105234	102864	118537	109380	119596	65280.4	66099.8	45996	42340.8	68086.1	46884.5	-	--	--	--	--	--	1.48909	0.00492757	0.510416	-0.970255	down	--	--	--	--	--	--	--	--	--	--
72	5,7,3',4',5'-Pentahydroxydihydroflavone	Flavonoids	66154.8	93399.7	74627.1	140007	119560	130819	166856	136647	212163	182064	198545	183100	238309	202631	209822	-	--	--	--	--	--	--	--	--	--	--	--	--	--	--	--	1.1939	0.00814638	1.66703	0.737278	up
73	Epicatechin-3-(3''-O-methyl)gallate	Flavonoids	544820	558971	570135	64924.2	65075.1	70760.3	563274	578625	600146	280721	264888	309762	571865	629270	459030	-	1.67541	0.000296478	8.67727	3.11724	up	1.56602	8.42873e-05	0.491016	-1.02616	down	--	--	--	--	--	1.29656	9.17769e-05	0.119933	-3.05969	down
74	Orientin-7-O-glucoside	Flavonoids	408321	300734	400588	794711	736186	843354	561629	594438	557019	542905	539857	567606	543269	485458	555342	-	--	--	--	--	--	--	--	--	--	--	--	--	--	--	--	1.24939	0.000867313	2.13965	1.09738	up
75	Quercetin-3-O-rutinoside-7-O-glucoside	Flavonoids	144360	150270	120430	269460	264787	250420	333148	291815	272487	342822	291853	334444	326897	306003	314002	-	--	--	--	--	--	--	--	--	--	--	--	--	--	--	--	1.26646	0.000825689	1.89049	0.918763	up
76	Phloretin-2'-O-glucoside (Phlorizin)	Flavonoids	25299.3	21312.2	29721.2	41842.1	37903.4	45457	53885.7	52953.4	65581.8	72625.7	58000.2	75145.1	76677	87515.6	66299.8	ko00941,ko01110	--	--	--	--	--	--	--	--	--	--	--	--	--	--	--	1.18774	0.00776875	1.64022	0.713891	up
77	5-Hydroxy-6,7,8,3',4'-pentamethoxyflavone	Flavonoids	11614.5	9849.01	24927.2	1989.73	1604.78	2729.02	11704.2	13404	10249	8780.89	5556.95	6266.35	3570.74	3215.94	3535.33	-	1.6438	0.00436104	5.59138	2.4832	up	--	--	--	--	--	--	--	--	--	--	--	--	--	--	--
78	Luteolin-7-O-neohesperidoside (Lonicerin)*	Flavonoids	1.03822e+06	1.00846e+06	931709	1.90372e+06	1.63062e+06	1.79038e+06	1.39996e+06	1.14806e+06	1.30624e+06	1.1e+06	924305	939258	856374	924470	904010	ko00944	--	--	--	--	--	--	--	--	--	--	--	--	--	--	--	1.27453	0.0045945	1.78779	0.838176	up
79	Eriodictyol-7-O-(6''-O-p-coumaroyl)glucoside	Flavonoids	36756.8	54802.1	50122.2	34472	34268.7	28653.5	48869.4	53228.7	57740	75414	64972	62161.3	70865.5	71686.2	70983.3	-	1.60003	0.00374591	1.64115	0.714703	up	--	--	--	--	--	--	--	--	--	--	--	--	--	--	--
80	Schaftoside	Flavonoids	37155.6	29630.1	26332.2	20720.5	26948.8	25067.9	44764.8	46275.9	41864.5	32511.8	32960	35479.5	31269.6	31583.1	34567.7	-	1.61623	0.00143343	1.8272	0.869633	up	1.51796	0.00367252	0.759574	-0.396737	down	--	--	--	--	--	--	--	--	--	--
81	Kaempferol-3-O-(2''-galloyl)galactoside	Flavonoids	1.49026e+06	1.78383e+06	1.77823e+06	394534	468966	526421	1.65285e+06	1.34452e+06	1.13988e+06	997401	891659	830722	996879	1.26792e+06	1.18726e+06	-	--	--	--	--	--	--	--	--	--	--	--	--	--	--	--	1.28146	0.00252068	0.275105	-1.86194	down
82	Kaempferol-3-O-(6''-galloyl)glucoside	Flavonoids	1.49026e+06	1.78383e+06	1.77823e+06	394534	468966	526421	1.65285e+06	1.34452e+06	1.13988e+06	997401	891659	830722	996879	1.26792e+06	1.18726e+06	-	--	--	--	--	--	--	--	--	--	--	--	--	--	--	--	1.28146	0.00252068	0.275105	-1.86194	down
83	Kaempferol-3-O-rutinoside-7-O-rhamnoside	Flavonoids	43396.1	40734.8	32885.9	74693.9	62226.4	61976.4	60147.8	61963.6	60739.7	41725.1	30909.1	36874.5	34643.5	41730.2	30855.7	-	--	--	--	--	--	--	--	--	--	--	--	--	--	--	--	1.20958	0.007986	1.69973	0.765304	up
84	Epicatechin-3'-O-β-D-glucopyranoside	Flavonoids	132072	149745	166698	245158	244057	248469	218348	273750	242867	280215	315894	261297	339002	332792	264446	-	--	--	--	--	--	--	--	--	--	--	--	--	--	--	--	1.25237	0.00961415	1.64473	0.717846	up
85	2,3-Dihydroxybenzoic Acid*	Phenolic acids	158760	161442	173647	358014	356021	346526	442901	393420	429957	717427	769145	655611	1.18565e+06	1.26887e+06	1.27836e+06	ko01110	--	--	--	--	--	1.54359	0.00513638	1.69172	0.758488	up	1.68967	0.000292848	1.74256	0.801206	up	1.29324	9.36617e-06	2.14754	1.10269	up
86	1-O-Salicyloyl-β-D-glucose	Phenolic acids	2.36039e+06	2.72432e+06	2.49138e+06	6.70574e+06	7.17202e+06	6.9856e+06	5.96126e+06	6.6962e+06	6.34006e+06	5.47186e+06	5.10639e+06	5.51048e+06	6.29452e+06	6.53592e+06	5.57361e+06	-	--	--	--	--	--	--	--	--	--	--	--	--	--	--	--	1.29172	2.16486e-05	2.75384	1.46145	up
87	4,6-(S)-Hexahydroxydiphenoyl-β-D-glucose	Phenolic acids	5.37792e+06	6.00224e+06	6.32577e+06	3.17201e+06	4.14266e+06	4.12045e+06	2.52375e+06	4.66344e+06	4.9954e+06	4.12626e+06	3.79e+06	4.36687e+06	3.42305e+06	3.30469e+06	2.89779e+06	-	--	--	--	--	--	--	--	--	--	--	--	--	--	--	--	1.1829	0.00826507	0.645836	-0.630761	down
88	3,4-Dihydroxybenzoic acid (Protocatechuic acid)*	Phenolic acids	125086	153698	170663	281483	295638	347106	342759	398055	407004	626733	573613	659007	1.07848e+06	1.13924e+06	972872	ko01100,ko01110	--	--	--	--	--	1.5223	0.0020925	1.6199	0.695907	up	1.67628	0.00398453	1.71597	0.779026	up	1.23955	0.00436584	2.05637	1.0401	up
89	4-O-Galloyl-1-O-Cinnamoyl-β-D-glucose	Phenolic acids	684834	699180	745681	890507	838191	859455	1.01649e+06	922445	1.04157e+06	1.04157e+06	1.25878e+06	1.05247e+06	1.10725e+06	1.09798e+06	1.12638e+06	-	--	--	--	--	--	--	--	--	--	--	--	--	--	--	--	1.23626	0.00341838	1.21527	0.281276	up
90	3-O-Digalloyl quinic acid	Phenolic acids	3.36809e+06	4.03096e+06	3.76342e+06	6.1358e+06	6.41985e+06	6.45304e+06	7.1036e+06	6.98785e+06	7.37199e+06	7.98672e+06	7.49108e+06	8.31603e+06	8.33634e+06	9.14594e+06	9.62683e+06	-	--	--	--	--	--	--	--	--	--	--	--	--	--	--	--	1.27072	0.0011995	1.70291	0.768003	up
91	Diisobutyl phthalate*	Phenolic acids	1.13224e+07	1.12477e+07	1.40481e+07	1.14395e+07	1.16635e+07	1.1125e+07	1.39889e+07	1.41289e+07	1.38111e+07	1.13405e+07	1.09008e+07	7.23956e+06	1.09529e+07	1.24214e+07	1.05003e+07	-	1.6578	0.00050504	1.22499	0.292768	up	--	--	--	--	--	--	--	--	--	--	--	--	--	--	--
92	Isochlorogenic acid C*	Phenolic acids	419307	456185	360034	434632	668483	629757	632548	800550	762829	395697	267328	308709	448515	319739	265157	-	--	--	--	--	--	1.50282	0.00392819	0.442516	-1.1762	down	--	--	--	--	--	--	--	--	--	--
93	Neochlorogenic acid (5-O-Caffeoylquinic acid)*	Phenolic acids	5.74195e+06	5.83994e+06	6.12225e+06	1.17238e+07	1.19445e+07	1.15599e+07	1.06578e+07	9.50205e+06	9.98293e+06	9.16178e+06	9.32011e+06	8.90581e+06	9.92365e+06	1.07835e+07	1.05469e+07	-	--	--	--	--	--	--	--	--	--	--	--	--	--	--	--	1.29449	3.32866e-06	1.98983	0.992644	up
94	1-O-Caffeoyl-β-D-xylose	Phenolic acids	211928	259447	293701	656402	664560	693541	578975	605572	650735	746261	744485	694778	658799	748328	655834	-	--	--	--	--	--	--	--	--	--	--	--	--	--	--	--	1.27224	0.000708732	2.63307	1.39675	up
95	Protocatechuic acid-4-O-glucoside*	Phenolic acids	434166	544404	511919	2.09218e+06	1.95693e+06	2.22465e+06	1.80596e+06	1.88379e+06	1.89259e+06	1.71321e+06	1.79227e+06	1.77061e+06	1.70821e+06	1.77862e+06	1.67611e+06	-	--	--	--	--	--	--	--	--	--	--	--	--	--	--	--	1.28976	0.000600716	4.20919	2.07354	up
96	2,5-Dihydroxybenzoic acid; Gentisic Acid*	Phenolic acids	41682.9	78789.1	52464.9	149166	164776	173411	202720	172619	172414	237252	303504	317643	502832	528742	586439	ko00350,ko01100	--	--	--	--	--	--	--	--	--	--	1.64045	0.00193588	1.88492	0.914504	up	1.22151	0.00251106	2.8181	1.49472	up
97	3-O-Methylgallic Acid*	Phenolic acids	719748	850413	791904	1.06635e+06	1.14931e+06	993718	931509	1.01693e+06	1.11437e+06	1.04656e+06	1.06436e+06	1.08368e+06	1.07206e+06	1.1114e+06	1.07657e+06	-	--	--	--	--	--	--	--	--	--	--	--	--	--	--	--	1.19775	0.00923173	1.35871	0.442242	up
98	4-O-Glucosyl-3,4-dihydroxybenzyl alcohol	Phenolic acids	17658.1	21237.7	21172.4	198468	194929	195444	172009	171341	179971	174529	173429	177793	166454	170613	162207	-	--	--	--	--	--	--	--	--	--	--	--	--	--	--	--	1.29523	4.55295e-08	9.80287	3.2932	up
99	1-O-Gentisoyl-β-D-glucoside*	Phenolic acids	759105	820511	817032	1.16379e+06	1.16146e+06	1.20754e+06	986404	1.13354e+06	1.12753e+06	993118	985167	1.00226e+06	912321	1.00894e+06	947053	-	--	--	--	--	--	--	--	--	--	--	--	--	--	--	--	1.28347	0.000176178	1.47405	0.55979	up
100	1-O-(3,4-Dihydroxy-5-methoxy-benzoyl)-glucoside	Phenolic acids	52839.4	57987.6	54238.1	84005.1	96187.3	94403.4	82701.2	81360	87742.1	109348	104524	104586	110442	111136	120878	-	--	--	--	--	--	1.53979	0.00106968	1.26471	0.338807	up	--	--	--	--	--	1.27161	0.00485642	1.66356	0.734275	up
101	3-Methoxybenzoic acid	Phenolic acids	29689.9	37519.6	30675.8	60551.4	64803.9	50539.6	72259.3	73618.1	79642.3	104525	94271	103059	146121	158512	181566	-	--	--	--	--	--	1.51336	0.00415089	1.33849	0.420601	up	--	--	--	--	--	--	--	--	--	--
102	Arbutin	Phenolic acids	137674	145120	149386	181170	171629	169897	144390	178759	204357	210749	229013	89965.5	167862	187539	239171	ko00010	--	--	--	--	--	--	--	--	--	--	--	--	--	--	--	1.23354	0.00353254	1.20944	0.274344	up
103	Ferulic acid-4-O-glucoside	Phenolic acids	85787.9	82316.6	106406	206891	162966	206580	155225	140053	158758	157759	150876	152064	171265	193980	188306	-	--	--	--	--	--	--	--	--	--	--	--	--	--	--	--	1.2413	0.00878823	2.09987	1.0703	up
104	1-O-Feruloylquinic acid	Phenolic acids	1.18686e+06	1.24833e+06	1.23172e+06	1.62873e+06	1.68622e+06	1.61561e+06	1.33228e+06	1.5057e+06	1.42398e+06	1.57271e+06	6.31416e+06	1.30338e+06	1.15048e+06	1.18861e+06	994080	-	--	--	--	--	--	--	--	--	--	--	--	--	--	--	--	1.28542	0.000143285	1.34461	0.427188	up
105	7-O-Galloyl-D-sedoheptulose	Phenolic acids	105998	120232	106297	165144	143604	147580	158977	168802	158753	165003	182981	169913	157975	143716	150339	-	--	--	--	--	--	--	--	--	--	--	--	--	--	--	--	1.21521	0.00925686	1.37231	0.456603	up
106	Chlorogenic acid (3-O-Caffeoylquinic acid)*	Phenolic acids	4.4441e+06	4.6595e+06	4.8671e+06	9.23166e+06	9.73659e+06	8.97723e+06	7.48591e+06	7.56232e+06	8.68143e+06	7.59685e+06	7.06911e+06	7.25522e+06	8.11309e+06	8.24721e+06	9.00206e+06	ko00940,ko00941,ko00945,ko01110	--	--	--	--	--	--	--	--	--	--	--	--	--	--	--	1.29028	0.000291435	2.00029	1.00021	up
107	Methyl Brevifolincarboxylate	Phenolic acids	120146	150567	147357	258021	229818	235453	239648	249067	254825	260101	229208	290418	262495	305948	261100	-	--	--	--	--	--	--	--	--	--	--	--	--	--	--	--	1.2463	0.00148852	1.73007	0.790832	up
108	1-O-Caffeoyl-β-D-glucose*	Phenolic acids	466335	506437	485578	700006	794289	760427	786711	724169	717060	715099	782299	694145	724420	813760	768276	-	--	--	--	--	--	--	--	--	--	--	--	--	--	--	--	1.27081	0.00460157	1.54608	0.628612	up
109	2,3-Di-O-Galloyl-β-D-Glucose	Phenolic acids	417407	420293	386414	565178	537502	576084	572837	548660	582860	670299	707412	641631	546667	717787	508269	-	--	--	--	--	--	--	--	--	--	--	--	--	--	--	--	1.26844	0.000669842	1.37141	0.455662	up
110	4-O-p-Coumaroylquinic acid	Phenolic acids	487350	495517	510254	788630	880392	838321	850022	706653	578225	516037	565709	447441	515340	612606	517075	-	--	--	--	--	--	--	--	--	--	--	--	--	--	--	--	1.28518	0.00406649	1.67926	0.747828	up
111	1,2,3-Tri-O-galloyl-β-D-glucose	Phenolic acids	1.05284e+06	852085	1.12544e+06	653514	965315	997744	1.03784e+06	1.06416e+06	1.07948e+06	1.40684e+06	1.48512e+06	1.38262e+06	1.24112e+06	1.15471e+06	1.43987e+06	-	--	--	--	--	--	1.55969	0.00300024	1.34358	0.426081	up	--	--	--	--	--	--	--	--	--	--
112	Trihydroxycinnamoylquinic acid	Phenolic acids	9064.56	8310.06	4589.18	16002.2	12100.5	11326.8	9079.54	17505	12105.6	16008.1	16609.6	14487.3	12201.6	10391	9767.51	-	--	--	--	--	--	--	--	--	--	--	1.59007	0.00741645	0.686979	-0.541662	down	--	--	--	--	--
113	Phenyl-β-D-glucopyranoside	Phenolic acids	126904	134106	126005	168060	159329	144525	154751	162904	168305	144905	166281	145805	99005.4	104404	117904	-	--	--	--	--	--	--	--	--	--	--	1.6029	0.00814701	0.703103	-0.508192	down	--	--	--	--	--
114	3-O-p-Coumaroylquinic acid*	Phenolic acids	1.40232e+06	1.33909e+06	1.60495e+06	2.93563e+06	3.29165e+06	3.28361e+06	2.67159e+06	2.90141e+06	2.60128e+06	2.27518e+06	2.30165e+06	2.42292e+06	2.42587e+06	2.7665e+06	2.26069e+06	-	--	--	--	--	--	--	--	--	--	--	--	--	--	--	--	1.27833	0.000529361	2.18824	1.12977	up
115	5-O-p-Coumaroylquinic acid*	Phenolic acids	1.40232e+06	1.33909e+06	1.60495e+06	2.93563e+06	3.29165e+06	3.28361e+06	2.67159e+06	2.90141e+06	2.60128e+06	2.27518e+06	2.30165e+06	2.42292e+06	2.42587e+06	2.7665e+06	2.26069e+06	ko00940,ko00941,ko00945,ko01110	--	--	--	--	--	--	--	--	--	--	--	--	--	--	--	1.27833	0.000529361	2.18824	1.12977	up
116	1-O-p-Coumaroyl-β-D-glucose	Phenolic acids	123719	172743	154374	501431	564955	627354	425095	504083	502873	373606	411443	386060	418750	436682	480528	-	--	--	--	--	--	--	--	--	--	--	--	--	--	--	--	1.27703	0.003262	3.75689	1.90954	up
117	Isochlorogenic acid B*	Phenolic acids	112143	120954	107598	164288	168144	187437	370005	166611	165987	102945	118551	102147	151623	127603	163305	-	--	--	--	--	--	--	--	--	--	--	--	--	--	--	--	1.25755	0.00471604	1.5259	0.609665	up
118	9S-Hydroxy-10E,12Z-octadecadienoic acid*	Lipids	1.0731e+06	1.08189e+06	1.03393e+06	122411	112350	111936	138218	132838	147083	139969	112402	145811	173056	189374	180435	ko00591	--	--	--	--	--	--	--	--	--	--	--	--	--	--	--	1.29636	0.000121367	0.108719	-3.20132	down
119	2-α-Linolenoyl-glycerol-1-O-glucoside	Lipids	280813	266969	242431	25307.3	25906.2	25288.4	26947.7	26571.3	27864.5	49927.3	52151.1	49963.3	107192	94488.5	91681.3	-	--	--	--	--	--	1.57775	9.23963e-05	1.86821	0.901659	up	1.70007	0.00886208	1.92948	0.948215	up	1.2961	0.00221148	0.0968118	-3.36867	down
120	LysoPE 20:3	Lipids	38369.4	48502.1	45042.6	12672.4	11677.8	11730	14250.6	11705.9	12473.5	13561	12820.3	13930.4	15571.5	14973.5	14850.6	-	--	--	--	--	--	--	--	--	--	--	--	--	--	--	--	1.28831	0.00797826	0.273513	-1.87032	down
121	Dodecanoic acid (Lauric acid)	Lipids	57739.7	58011.6	60685.7	35318.7	41754.8	33735.5	35358.8	37111.5	38851.6	39068.1	40392.7	36790.3	40144.7	41575.6	41035.6	ko00061,ko01100,ko01110	--	--	--	--	--	--	--	--	--	--	--	--	--	--	--	1.24779	0.00627211	0.628037	-0.671078	down
122	α-Linolenic Acid*	Lipids	1.03557e+08	1.04754e+08	1.04944e+08	3.86633e+07	3.9446e+07	4.20476e+07	4.95276e+07	4.84288e+07	4.76402e+07	7.21761e+07	7.58374e+07	7.52203e+07	8.27106e+07	8.3764e+07	8.4922e+07	ko00592,ko01040,ko01100,ko01110	1.61112	0.00495366	1.21172	0.277056	up	1.57484	0.00031898	1.53324	0.61658	up	--	--	--	--	--	1.29537	2.96461e-05	0.383575	-1.38242	down
123	13(S)-HODE;13(S)-Hydroxyoctadeca-9Z,11E-dienoic acid*	Lipids	989779	1.01764e+06	893016	99673.7	103612	103229	123343	123514	129900	127574	131182	117075	157336	168721	164147	ko00591	1.64253	0.00192994	1.22916	0.297673	up	--	--	--	--	--	1.64634	0.00256824	1.30432	0.3833	up	1.29613	0.00188359	0.105679	-3.24224	down
124	LysoPE 20:3(2n isomer)	Lipids	40037.1	40981.1	49381.5	7621.48	11367.7	10849	12117.9	7609.68	10784	7386.98	8128.1	11233	17128.2	14590.5	14695.2	-	--	--	--	--	--	--	--	--	--	--	--	--	--	--	--	1.27457	0.00332958	0.22882	-2.12771	down
125	LysoPE 17:0	Lipids	23953.1	26626.7	23098.9	6874.96	6054.01	5794.67	5258.62	6619.16	5893.38	5271.05	5601.41	4647.13	6396.3	6432.24	5694.46	-	--	--	--	--	--	--	--	--	--	--	--	--	--	--	--	1.2905	0.00167541	0.254126	-1.97639	down
126	13S-Hydroxy-9Z,11E,15Z-octadecatrienoic acid	Lipids	619301	676821	580341	15859.1	17672.5	16399.3	21952.5	22760.1	21016.8	18410.2	19496.9	17390.4	28405.8	32309.1	27395.9	ko00592	1.61152	0.00205845	1.31641	0.396607	up	--	--	--	--	--	1.66407	0.00975613	1.59339	0.672104	up	1.29644	0.00210489	0.0266091	-5.23194	down
127	LysoPC 16:0	Lipids	5.87181e+07	5.68868e+07	5.93915e+07	1.37518e+07	1.35542e+07	1.38926e+07	1.37196e+07	1.41708e+07	1.45483e+07	1.25219e+07	1.21595e+07	1.31722e+07	1.69173e+07	1.62138e+07	1.67055e+07	-	--	--	--	--	--	--	--	--	--	--	1.68908	0.000675736	1.31657	0.396779	up	1.29682	0.000226356	0.235426	-2.08666	down
128	4-Oxo-9Z,11Z,13E,15E-Octadecatetraenoic Acid	Lipids	146301	162392	154763	39079.7	41038	44843.1	48871.8	69265	52796.2	25032.5	30121.6	25435.3	26205.7	35961.9	30439.2	-	--	--	--	--	--	--	--	--	--	--	--	--	--	--	--	1.2934	0.00054828	0.269628	-1.89096	down
129	LysoPC 18:1(2n isomer)	Lipids	3.81757e+06	3.49302e+06	3.50502e+06	1.68039e+06	1.66495e+06	1.80768e+06	1.79424e+06	1.96856e+06	2.20498e+06	2.4521e+06	2.29492e+06	2.66897e+06	3.22445e+06	3.51121e+06	3.30533e+06	-	--	--	--	--	--	--	--	--	--	--	1.63207	0.00379233	1.35397	0.437191	up	1.29013	0.000884538	0.476443	-1.06963	down
130	alpha-Hydroxylinoleic acid	Lipids	777106	812441	757047	91016	78161.8	87294.3	101971	99752.5	113950	107770	98210.3	100325	128306	147755	124016	-	--	--	--	--	--	--	--	--	--	--	--	--	--	--	--	1.29559	0.000289779	0.109296	-3.19369	down
131	LysoPE 18:1(2n isomer)	Lipids	689749	676293	685858	277983	278705	254791	269777	288930	264579	313906	319184	288394	406018	385050	378400	-	--	--	--	--	--	--	--	--	--	--	1.63843	0.00299665	1.26911	0.343821	up	1.29419	2.31958e-05	0.395477	-1.33833	down
132	LysoPC 20:3	Lipids	232073	223580	225993	64745.5	57394	45770.6	60369.2	55453.6	51271.7	54794.1	57793.2	64200.9	85459.9	73086.6	78885.8	-	--	--	--	--	--	--	--	--	--	--	--	--	--	--	--	1.28313	0.000159325	0.24633	-2.02133	down
133	2R-Hydroxyoctadecanoic Acid*	Lipids	109885	107423	102278	124513	131307	134223	131607	126659	123157	106157	122280	112514	108222	125746	116603	-	--	--	--	--	--	--	--	--	--	--	--	--	--	--	--	1.23869	0.00364214	1.22046	0.287428	up
134	LysoPC 14:0	Lipids	100503	93764.5	91329	25259	24417.3	25208.2	21969.4	24480.2	17427.2	27022	15391.3	27361.8	26564	31073	36482.2	-	--	--	--	--	--	--	--	--	--	--	--	--	--	--	--	1.29566	0.0013885	0.262204	-1.93124	down
135	LysoPC 16:1(2n isomer)	Lipids	319312	382046	358783	215565	209936	185322	210728	220638	199071	295781	295982	257922	374891	414449	358698	-	--	--	--	--	--	--	--	--	--	--	--	--	--	--	--	1.25604	0.00553162	0.576171	-0.795431	down
136	LysoPE 18:2	Lipids	1.12157e+07	1.06451e+07	1.10058e+07	4.01196e+06	3.79655e+06	4.1172e+06	4.04859e+06	4.16391e+06	4.18118e+06	5.54579e+06	5.97871e+06	6.01765e+06	7.47919e+06	7.68527e+06	7.42743e+06	-	--	--	--	--	--	1.56073	0.00493156	1.41541	0.501221	up	1.67916	0.00217742	1.28786	0.364979	up	1.29507	2.93604e-05	0.362852	-1.46255	down
137	γ-Linolenic Acid*	Lipids	9.70952e+07	1.08864e+08	3.94163e+07	4.15422e+07	4.24147e+07	3.57708e+07	4.15941e+07	5.11948e+07	4.84172e+07	6.28189e+07	7.47894e+07	7.1528e+07	8.72325e+07	8.59058e+07	8.625e+07	ko00591,ko01040,ko01100	--	--	--	--	--	1.46135	0.00875964	1.48107	0.566641	up	--	--	--	--	--	--	--	--	--	--
138	LysoPC 18:3(2n isomer)	Lipids	6.16198e+06	7.02236e+06	6.9373e+06	2.56024e+06	2.35156e+06	2.48451e+06	2.67026e+06	2.56491e+06	2.61099e+06	3.41653e+06	3.58503e+06	4.14521e+06	5.13592e+06	5.12916e+06	4.71954e+06	-	--	--	--	--	--	--	--	--	--	--	--	--	--	--	--	1.29078	0.00289899	0.36758	-1.44387	down
139	LysoPC 16:2	Lipids	247776	224242	237359	77968.7	72039.2	67427.5	66694.9	84746.4	66849.4	87394.5	86922.7	82514.4	116226	126751	106053	-	--	--	--	--	--	--	--	--	--	--	--	--	--	--	--	1.29206	0.000341209	0.306516	-1.70597	down
140	9,10,13-Trihydroxy-11-Octadecenoic Acid	Lipids	49553.3	48342.8	51923.1	29601.9	33751.4	30680.2	48271.5	49011.4	49474.7	44380.1	35796.5	45980.1	53527.9	51124.8	53955.6	ko00591	1.65045	0.00292271	1.5607	0.642189	up	--	--	--	--	--	--	--	--	--	--	1.27476	0.000388942	0.627646	-0.671976	down
141	LysoPC 18:0	Lipids	2.35132e+06	2.39505e+06	2.24591e+06	660351	670370	678695	583502	652704	627525	509644	501181	501677	676767	643985	637959	-	--	--	--	--	--	--	--	--	--	--	1.70103	0.00470564	1.29501	0.372967	up	1.29632	0.000607222	0.287376	-1.79899	down
142	LysoPC 16:0(2n isomer)	Lipids	1.33743e+07	1.40641e+07	1.59429e+07	2.71361e+06	2.43006e+06	2.73699e+06	2.7241e+06	2.64062e+06	3.2177e+06	2.35595e+06	2.49642e+06	2.68876e+06	3.4157e+06	3.32408e+06	3.4525e+06	-	--	--	--	--	--	--	--	--	--	--	1.66405	0.00564527	1.35156	0.434623	up	1.29334	0.00370585	0.18166	-2.46068	down
143	LysoPC 17:2	Lipids	54309	66406.8	53576.3	28137.7	23551.5	21981.3	25597.9	27036.7	23243.1	44766.4	36796.4	35731.3	60378.3	54046.5	54185.9	-	--	--	--	--	--	--	--	--	--	--	--	--	--	--	--	1.26169	0.00682939	0.422684	-1.24235	down
144	LysoPE 16:0(2n isomer)	Lipids	5.68789e+06	6.13538e+06	5.49143e+06	1.28838e+06	1.19129e+06	1.23376e+06	1.31351e+06	1.24487e+06	1.20619e+06	1.31537e+06	1.32936e+06	1.36569e+06	1.72264e+06	1.62971e+06	1.66149e+06	-	--	--	--	--	--	--	--	--	--	--	1.69406	0.00146802	1.2502	0.322164	up	1.29512	0.00144887	0.214466	-2.22118	down
145	LysoPC 17:0	Lipids	65173.2	67027.4	57247.4	15414.3	15028.9	13143.8	13139.3	15416.3	14602.8	10331.8	11585.9	13565.1	17077.9	15123.7	16445.1	-	--	--	--	--	--	--	--	--	--	--	--	--	--	--	--	1.29097	0.00253464	0.230074	-2.11983	down
146	LysoPC 20:1	Lipids	188335	189313	209191	78409.3	79676.1	82860.7	72462	77354.6	75741.4	86403.9	85285	85340.8	103583	113360	112028	-	--	--	--	--	--	--	--	--	--	--	--	--	--	--	--	1.2926	0.00259118	0.410583	-1.28426	down
147	2R-hydroxy-9Z,12Z,15Z-octadecatrienoic acid	Lipids	138239	162538	137769	82907	81100.2	83522.2	106275	99138.6	102264	82605.6	92131.2	86578	97002.5	97162.6	95547.7	ko00592	1.64368	0.00560626	1.24299	0.313819	up	--	--	--	--	--	--	--	--	--	--	--	--	--	--	--
148	(9Z,11E)-Octadecadienoic acid*	Lipids	95341.7	121172	108527	42215.7	42518.3	44418.5	45009	42635.5	43210	91384.7	77759.9	83094.5	96925.4	96472.9	88925.8	ko00591	--	--	--	--	--	1.56292	0.00788	1.92763	0.946828	up	--	--	--	--	--	--	--	--	--	--
149	Linoleic acid*	Lipids	95341.7	121172	108527	42215.7	42518.3	44418.5	45009	42635.5	43210	91384.7	77759.9	83094.5	96925.4	96472.9	88925.8	ko00591,ko01040,ko01100	--	--	--	--	--	1.56292	0.00788	1.92763	0.946828	up	--	--	--	--	--	--	--	--	--	--
150	LysoPC 18:3	Lipids	5.70494e+07	6.06626e+07	5.92878e+07	2.69081e+07	2.47253e+07	2.52236e+07	2.75456e+07	2.65355e+07	2.66339e+07	4.17071e+07	3.89072e+07	3.89481e+07	5.40372e+07	5.40706e+07	5.60815e+07	-	--	--	--	--	--	1.56725	0.00234355	1.48129	0.566855	up	1.6962	0.000343008	1.37325	0.457596	up	1.29315	4.83151e-05	0.434221	-1.2035	down
151	LysoPE 16:0	Lipids	1.80483e+07	18667835	1.70422e+07	4.32932e+06	4.38721e+06	4.39633e+06	4.91185e+06	4.68742e+06	5.09061e+06	4.81859e+06	4.57419e+06	4.66995e+06	5.96429e+06	5.65616e+06	5.58055e+06	-	--	--	--	--	--	--	--	--	--	--	1.66735	0.00335307	1.22316	0.290617	up	1.29604	0.00119693	0.243922	-2.03551	down
152	9,16-Dihydroxypalmitic acid	Lipids	193821	182192	213271	125035	110138	136542	145103	160560	179648	209628	206007	216819	238302	232771	243476	-	--	--	--	--	--	--	--	--	--	--	--	--	--	--	--	1.2305	0.00396569	0.630792	-0.664764	down
153	LysoPC 18:2(2n isomer)	Lipids	8.37984e+06	8.48575e+06	7.51771e+06	2.68542e+06	3.4248e+06	2.81466e+06	2.88159e+06	3.5652e+06	2.86674e+06	3.95028e+06	4.35772e+06	4.12446e+06	5.62771e+06	7.32455e+06	5.5239e+06	-	--	--	--	--	--	--	--	--	--	--	--	--	--	--	--	1.27967	0.000281792	0.366024	-1.44999	down
154	LysoPC 20:2	Lipids	312890	311337	322626	94988.3	106704	92445.4	103731	96421.1	94124.3	103641	115620	116790	149918	119638	150032	-	--	--	--	--	--	--	--	--	--	--	--	--	--	--	--	1.29324	4.23123e-06	0.310648	-1.68665	down
155	LysoPE 16:1(2n isomer)	Lipids	48824.2	60203.3	53306.7	86257.8	87109.2	87364.7	82927.5	71662.1	67735.9	79878.5	62050.9	70370.8	59719.7	61089.8	51324.9	-	--	--	--	--	--	--	--	--	--	--	--	--	--	--	--	1.25722	0.00946982	1.60614	0.6836	up
156	12,13-Epoxy-9-Octadecenoic Acid	Lipids	20494	21411.7	18824.5	6826.94	7647.93	7005.55	9252.4	10346.2	10186.1	9609.75	12893.7	10726.9	13090.1	15049.7	14597.3	ko00591,ko01100	1.60514	0.00379684	1.3866	0.471549	up	--	--	--	--	--	--	--	--	--	--	1.2908	0.00151032	0.353702	-1.49939	down
157	LysoPE 20:2	Lipids	65317.1	62665.5	57088.4	13947.6	15740.9	14573.4	14241.1	14038.3	13985	17145.1	15360.2	16480.8	16138.5	17416	16949.4	-	--	--	--	--	--	--	--	--	--	--	--	--	--	--	--	1.29353	0.00182113	0.239162	-2.06394	down
158	17-Hydroxylinolenic acid	Lipids	321549	341796	309334	38499.4	42781.2	43444.8	47995.9	51155	49489.2	49383.2	53525.8	50045.2	59061.3	64126	68002.3	ko00592	--	--	--	--	--	--	--	--	--	--	--	--	--	--	--	1.29573	0.000859521	0.128229	-2.96321	down
159	Crepenynic acid	Lipids	572376	672413	601413	147656	145891	157036	165352	168813	171487	306207	305482	304554	374581	397912	374118	ko00591	--	--	--	--	--	1.57985	6.36205e-05	1.812	0.857586	up	--	--	--	--	--	1.29335	0.00366945	0.24406	-2.03469	down
160	4-Hydroxysphinganine	Lipids	351709	340318	330001	520305	522796	500027	445152	478835	524469	505106	470784	493026	485046	496155	466675	ko00600,ko01100	--	--	--	--	--	--	--	--	--	--	--	--	--	--	--	1.28913	6.18624e-05	1.50987	0.594423	up
161	LysoPC 20:2(2n isomer)	Lipids	58334.1	70865.3	66232.9	20853.9	21691.4	26837.3	21449.8	21155.8	21381.8	29884	29124.4	32686.2	36774.4	39414.4	37093.8	-	--	--	--	--	--	--	--	--	--	--	1.60317	0.00742044	1.23543	0.305016	up	1.27536	0.00205465	0.355021	-1.49402	down
162	9-Hydroxy-10,12,15-octadecatrienoic acid*	Lipids	11128.6	9147.43	8185.5	1872.29	1102.83	1541.01	1616.58	2661.76	1557.3	2057.47	2033.55	2239.19	3705.13	2253.86	733.824	ko00592	--	--	--	--	--	--	--	--	--	--	--	--	--	--	--	1.27317	0.00827053	0.158675	-2.65585	down
163	13-KODE; (9Z,11E)-13-Oxooctadeca-9,11-dienoic acid*	Lipids	11128.6	9147.43	8185.5	1872.29	1102.83	1541.01	1616.58	2661.76	1557.3	2057.47	2033.55	2239.19	3705.13	2253.86	733.824	ko00591	--	--	--	--	--	--	--	--	--	--	--	--	--	--	--	1.27317	0.00827053	0.158675	-2.65585	down
164	LysoPC 15:1	Lipids	151354	159476	173276	48992.8	48524.7	54108	47122.3	55816.5	53164.3	60682.1	51909.9	58771.8	75797.1	72299	71925.1	-	--	--	--	--	--	--	--	--	--	--	--	--	--	--	--	1.29196	0.00185082	0.313207	-1.67481	down
165	LysoPE 18:1	Lipids	1.86737e+06	1.82566e+06	1.67469e+06	517768	512469	528961	579000	536709	566443	598852	583575	623357	730761	747933	704075	-	--	--	--	--	--	--	--	--	--	--	1.65826	0.00194928	1.20876	0.273534	up	1.29498	0.0019953	0.290477	-1.78351	down
166	LysoPC 18:2	Lipids	6.7896e+07	6.33451e+07	6.25909e+07	2.47758e+07	2.42643e+07	2.64782e+07	2.67224e+07	2.6784e+07	2.72637e+07	3.67528e+07	3.75559e+07	3.60167e+07	5.17631e+07	5.13186e+07	4.97114e+07	-	--	--	--	--	--	1.57491	0.000615193	1.36592	0.44987	up	1.70978	0.000103205	1.38493	0.469815	up	1.29328	0.000458996	0.389607	-1.35991	down
167	Punicic acid (9Z,11E,13Z-octadecatrienoic acid)	Lipids	2.34783e+06	2.36945e+06	2.04244e+06	430694	515494	471128	563966	598239	575786	539519	510052	348828	473518	566424	616386	-	--	--	--	--	--	--	--	--	--	--	--	--	--	--	--	1.29186	0.00233824	0.209671	-2.2538	down
168	LysoPE 18:3(2n isomer)	Lipids	6.92447e+06	7.88903e+06	7.34344e+06	3.22191e+06	2.64952e+06	3.16349e+06	3.12375e+06	2.91809e+06	3.06103e+06	4.53183e+06	4.22271e+06	4.6436e+06	7.19736e+06	5.73613e+06	5.24215e+06	-	--	--	--	--	--	1.55589	0.00234091	1.47186	0.557638	up	--	--	--	--	--	1.27997	0.000466173	0.407769	-1.29417	down
169	12,13-DHOME; (9Z)-12,13-Dihydroxyoctadec-9-enoic acid	Lipids	31828.9	31773.8	33018.7	45791.4	43978.9	48627.4	44981.2	44155.2	48733.7	52647.5	48243.3	51023.1	60167.4	61497.5	61346.1	ko00591	--	--	--	--	--	--	--	--	--	--	1.65358	0.00938801	1.2047	0.268676	up	1.27684	0.00571865	1.43237	0.518403	up
170	LysoPC 18:0(2n isomer)	Lipids	387916	406504	373387	110879	116451	114185	98081	103242	122668	108537	98565.5	101434	134966	125638	121158	-	--	--	--	--	--	--	--	--	--	--	--	--	--	--	--	1.29565	0.000916566	0.292441	-1.77378	down
171	1-α-Linolenoyl-glycerol-3-O-glucoside	Lipids	286204	271256	229400	25367.9	25529.8	25232.5	27540.6	29443.8	28802.1	51077.1	54440.8	49925.3	107179	94757.8	91143.6	-	--	--	--	--	--	1.57139	0.00103868	1.81198	0.857565	up	1.69397	0.00739178	1.88545	0.914911	up	1.29485	0.0051087	0.0967519	-3.36957	down
172	LysoPC 16:2(2n isomer)	Lipids	238656	217020	243972	72253.4	71924.3	75315.7	74207.1	81535.8	69471.9	80683.7	89782.6	86007	113099	116476	93092.3	-	--	--	--	--	--	--	--	--	--	--	--	--	--	--	--	1.29435	0.00229449	0.31372	-1.67245	down
173	LysoPE 18:0(2n isomer)	Lipids	28904.3	25118.9	23609.7	7746.88	7456.32	6714.44	7803.91	7619.86	8525.35	7308.97	9508.22	7485.89	10994.1	9625.95	10146.6	-	--	--	--	--	--	--	--	--	--	--	--	--	--	--	--	1.28809	0.00562659	0.282324	-1.82457	down
174	13(s)-hydroperoxy-(9z,11e,15z)-octadecatrienoic acid	Lipids	142752	135617	143329	95850.2	109558	111068	94355.5	93092.5	105316	107994	109389	101931	107387	102539	110182	ko00592,ko01100,ko01110	--	--	--	--	--	--	--	--	--	--	--	--	--	--	--	1.22652	0.00770038	0.750481	-0.414113	down
175	LysoPE 16:1	Lipids	321676	312341	306410	111523	128859	153792	104395	111958	122218	143790	149784	149584	156852	156434	145342	-	--	--	--	--	--	--	--	--	--	--	--	--	--	--	--	1.26907	0.00189663	0.419143	-1.25448	down
176	LysoPE 18:3	Lipids	7.36999e+06	7.88091e+06	7.05349e+06	2.54605e+06	2.63112e+06	2.66259e+06	3.15382e+06	2.71167e+06	2.80204e+06	4.41291e+06	3.94964e+06	4.42084e+06	5.83539e+06	6.19593e+06	5.76519e+06	-	--	--	--	--	--	1.51306	0.00283834	1.47486	0.560578	up	1.66294	0.00136314	1.39216	0.477325	up	1.29412	0.00209411	0.35149	-1.50845	down
177	LysoPC 18:1	Lipids	5.09254e+06	4.93924e+06	4.39634e+06	1.90753e+06	1.74188e+06	1.85402e+06	1.80359e+06	1.8565e+06	1.97168e+06	2.03344e+06	2.03826e+06	2.08208e+06	3.02338e+06	2.92576e+06	2.84272e+06	-	--	--	--	--	--	--	--	--	--	--	1.70973	0.00184463	1.42869	0.514694	up	1.28922	0.00348341	0.381438	-1.39048	down
178	LysoPC 17:1	Lipids	199862	222334	218369	23128.8	59021.8	57912.2	58474.8	59145	29232.1	25190.9	63188.2	28561.1	62452.8	47760.8	46687	-	--	--	--	--	--	--	--	--	--	--	--	--	--	--	--	1.21069	0.000816289	0.218655	-2.19327	down
179	11-Octadecanoic acid(Vaccenic acid)	Lipids	1.65762e+07	1.69083e+07	1.6895e+07	1.1914e+07	1.23715e+07	1.2316e+07	1.34537e+07	1.33876e+07	1.37785e+07	1.66988e+07	1.64668e+07	1.55571e+07	1.70874e+07	1.95076e+07	1.86786e+07	-	--	--	--	--	--	--	--	--	--	--	--	--	--	--	--	1.29268	2.62816e-05	0.726515	-0.460935	down
180	LysoPE 18:2(2n isomer)	Lipids	1.12961e+07	1.15865e+07	9.74641e+06	5.47868e+06	4.94642e+06	5.08571e+06	5.57401e+06	5.99852e+06	6.17024e+06	7.4276e+06	7.70542e+06	8.72294e+06	9.59866e+06	9.10001e+06	1.07868e+07	-	--	--	--	--	--	--	--	--	--	--	--	--	--	--	--	1.27875	0.00651232	0.475368	-1.07288	down
181	LysoPC 15:0	Lipids	250087	276439	233757	58794.3	51471.6	46391.9	49153.8	46569.3	46618.3	43657	43149.4	52380.2	46307.4	49555.1	62170.7	-	--	--	--	--	--	--	--	--	--	--	--	--	--	--	--	1.28929	0.00208085	0.206052	-2.27892	down
182	LysoPE 18:0	Lipids	265239	244563	226255	67974	65988.4	66529.3	64513.6	66845	65810.6	61194	56984.9	55789.8	65207.7	65534.4	69364.3	-	--	--	--	--	--	--	--	--	--	--	--	--	--	--	--	1.2936	0.00387421	0.272386	-1.87627	down
183	LysoPE 14:0	Lipids	54564	60575	46252.7	18264.6	17342.6	15342.6	20106.7	16025.9	16855.4	14698.7	13671.6	14369	17843.3	17908.7	18326.9	-	--	--	--	--	--	--	--	--	--	--	1.68738	0.00168211	1.26532	0.3395	up	--	--	--	--	--
184	Elaidic Acid	Lipids	1.51302e+07	1.60219e+07	1.5991e+07	1.07402e+07	1.14575e+07	1.07484e+07	1.25319e+07	1.27606e+07	1.25137e+07	1.68908e+07	1.45428e+07	1.52364e+07	1.63277e+07	1.83042e+07	1.66802e+07	-	--	--	--	--	--	--	--	--	--	--	--	--	--	--	--	1.28106	0.000292466	0.698852	-0.51694	down
185	LysoPE 17:1(2n isomer)	Lipids	72984.6	67578.4	64995.5	28932.3	31698.7	27719.4	29536.8	27857.4	27920.5	35904.2	32252	30989.7	34301.6	34816	35860.1	-	--	--	--	--	--	--	--	--	--	--	--	--	--	--	--	1.28724	0.000736394	0.429807	-1.21824	down
186	1-α-Linolenoyl-glycerol	Lipids	1.49493e+06	1.13057e+06	1.38158e+06	55472.8	50175.7	48662.2	66021.9	68137.3	73966.3	134054	155701	116494	580528	551489	582326	-	1.58298	0.00496284	1.34874	0.431615	up	--	--	--	--	--	1.70743	9.90515e-06	4.21993	2.07722	up	1.29497	0.00693731	0.0385095	-4.69864	down
187	1-α-Linolenoyl-glycerol-2,3-di-O-glucoside	Lipids	17980.4	20846	16293.8	5796.72	7518.46	7609.07	6001.84	6947.82	11207.2	13469.7	11213.7	10501	21997	28832.3	23764.9	-	--	--	--	--	--	--	--	--	--	--	--	--	--	--	--	1.26308	0.00579416	0.379611	-1.39741	down
188	2-α-Linolenoyl-glycerol	Lipids	320066	265346	278289	26539	27039.8	26538	38467.8	33222.4	38167.9	64129.2	65307.7	61690.2	246114	218541	181784	-	--	--	--	--	--	1.5559	0.000481401	1.73976	0.798892	up	--	--	--	--	--	1.29563	0.00396919	0.0927597	-3.43036	down
189	LysoPC 15:0(2n isomer)	Lipids	68331.7	73148.6	68113.8	16081.3	15854.5	18714.4	12913.1	10223.3	12944	16122.3	15893.6	12576.8	22379.1	17439.5	13821.6	-	--	--	--	--	--	--	--	--	--	--	--	--	--	--	--	1.29287	7.06045e-05	0.241658	-2.04896	down
190	LysoPC 17:0(2n isomer)	Lipids	131978	136816	116936	31081.7	31587.6	31246.9	28311.4	27743.1	22518.1	30199.5	23322.1	23852.4	35861.1	30257.5	30356.7	-	--	--	--	--	--	--	--	--	--	--	--	--	--	--	--	1.29397	0.00374761	0.243476	-2.03815	down
191	1-Linoleoylglycerol	Lipids	401304	393573	354628	19322.4	16919.1	17695.7	18231.3	19910	23423.3	32769.3	36828	26613.9	132610	147942	135432	-	--	--	--	--	--	--	--	--	--	--	1.70314	0.000147188	4.32366	2.11225	up	1.29609	0.00152607	0.0469221	-4.41359	down
192	2-Linoleoylglycerol	Lipids	87822.6	78251.4	78369.1	9755.57	11265.7	10431.9	12893.8	11851.9	16082.6	18830.6	20498.1	22100.3	72356.4	64556.8	67973.1	-	--	--	--	--	--	--	--	--	--	--	1.71241	0.000575354	3.33534	1.73783	up	1.29522	0.0016845	0.128673	-2.95822	down
193	LysoPE 15:0(2n isomer)	Lipids	9158.77	10956.5	10583.5	4292.46	3224.33	1923.87	3454.7	1041.91	3192.07	1713.7	4536.89	3985.16	4136.29	3493.33	2482.32	-	--	--	--	--	--	--	--	--	--	--	--	--	--	--	--	1.20599	0.00155253	0.307526	-1.70122	down
194	Methyl linolenate	Lipids	250650	246019	154658	15858.8	6914.51	13055.3	8721.35	23114	12480.6	11259.8	10372.1	12190	18680.9	18063.1	19860.3	-	--	--	--	--	--	--	--	--	--	--	1.68321	0.00051882	1.6736	0.742951	up	--	--	--	--	--
195	Aminomalonic acid	Organic acids	627723	362567	468227	396402	371596	386516	257570	287597	242310	306214	226979	269889	572507	336074	432721	-	1.61575	0.00358067	0.682086	-0.551975	down	--	--	--	--	--	--	--	--	--	--	--	--	--	--	--
196	2-Isopropylmalic Acid	Organic acids	3283915	3.75052e+06	3.9568e+06	6.44887e+06	7.58422e+06	7.27212e+06	6.50607e+06	7.21395e+06	6.52386e+06	6.80738e+06	7.33103e+06	6.997e+06	6.79702e+06	8.13522e+06	7.14453e+06	ko00290,ko00620,ko01100,ko01110,ko01210,ko01230	--	--	--	--	--	--	--	--	--	--	--	--	--	--	--	1.26555	0.00233131	1.93838	0.954854	up
197	2-Aminoisobutyric acid*	Organic acids	1.27533e+07	1.18957e+07	1.29655e+07	6.06142e+06	6.14889e+06	5.27704e+06	4.91579e+06	5.8454e+06	5.54622e+06	6.57634e+06	6.75625e+06	6.59224e+06	5.85051e+06	5.52005e+06	5.95584e+06	-	--	--	--	--	--	--	--	--	--	--	--	--	--	--	--	1.28357	0.000116189	0.46491	-1.10498	down
198	Malonic acid	Organic acids	399084	347891	389356	517917	503319	528143	534651	572700	569482	502913	473746	514534	528869	481837	492468	ko00061,ko00240,ko00410,ko01100,ko01212	--	--	--	--	--	--	--	--	--	--	--	--	--	--	--	1.24659	0.00521874	1.36349	0.447305	up
199	γ-Aminobutyric acid	Organic acids	1.33521e+06	1.19698e+06	1.37401e+06	1.01343e+06	1.05206e+06	954614	1.1304e+06	1.29892e+06	1.1935e+06	1.49032e+06	1.65635e+06	1.64742e+06	1.91519e+06	1.90299e+06	1.8817e+06	ko00250,ko00330,ko00410,ko00650,ko00760,ko01100	--	--	--	--	--	1.47837	0.00602361	1.3233	0.404141	up	--	--	--	--	--	--	--	--	--	--
200	3-Dehydroshikimic acid	Organic acids	366787	295037	325716	307688	329766	327666	380408	401866	384265	305415	315034	326629	218949	290374	276344	ko00400,ko00999,ko01100,ko01110,ko01230,ko01240	1.60811	0.00227584	1.2087	0.273455	up	1.53511	0.00128219	0.811869	-0.300681	down	--	--	--	--	--	--	--	--	--	--
201	4,8-Dihydroxyquinoline-2-carboxylic acid	Organic acids	437456	544267	588860	881577	881223	978269	895895	936775	885384	901876	935618	818497	927849	930139	1.0102e+06	ko00380	--	--	--	--	--	--	--	--	--	--	--	--	--	--	--	1.22811	0.00303966	1.74526	0.803438	up
202	2-Propylmalic Acid*	Organic acids	3.65539e+06	4.05127e+06	4.15363e+06	6.98643e+06	7.9083e+06	7.92617e+06	6.23948e+06	7.50282e+06	8.34867e+06	7.6092e+06	7.5583e+06	7.31351e+06	7.98703e+06	8.24671e+06	7.91687e+06	ko00620	--	--	--	--	--	--	--	--	--	--	--	--	--	--	--	1.27719	0.00207451	1.92414	0.944216	up
203	3-Isopropylmalic Acid*	Organic acids	3.65539e+06	4.05127e+06	4.15363e+06	6.98643e+06	7.9083e+06	7.92617e+06	6.23948e+06	7.50282e+06	8.34867e+06	7.6092e+06	7.5583e+06	7.31351e+06	7.98703e+06	8.24671e+06	7.91687e+06	ko00290,ko01100,ko01110,ko01210,ko01230	--	--	--	--	--	--	--	--	--	--	--	--	--	--	--	1.27719	0.00207451	1.92414	0.944216	up
204	β-Hydroxyisovaleric acid	Organic acids	96146.6	122004	126671	223607	218190	255683	185617	229093	221201	212090	203632	242895	207309	248594	257717	ko00280,ko01100	--	--	--	--	--	--	--	--	--	--	--	--	--	--	--	1.24866	0.00172413	2.02273	1.0163	up
205	L-Citramalic acid	Organic acids	138887	148441	149902	218150	199200	223834	216676	210255	265115	214618	232572	260205	249764	299702	313341	ko00660,ko01100	--	--	--	--	--	--	--	--	--	--	--	--	--	--	--	1.26591	0.00461183	1.46647	0.552347	up
206	Dimethylmalonic acid*	Organic acids	76323.4	93986.8	86116.7	115429	127690	124250	104859	159869	136941	143124	136271	129864	155940	148792	138404	-	--	--	--	--	--	--	--	--	--	--	--	--	--	--	--	1.21534	0.00565252	1.43264	0.518681	up
207	2-Methylsuccinic acid*	Organic acids	814003	939241	947760	1.18758e+06	1.28356e+06	1.39293e+06	1.33211e+06	1.38617e+06	1.43969e+06	1.53629e+06	1.48277e+06	1465016	1.52359e+06	1.56107e+06	1.608e+06	-	--	--	--	--	--	--	--	--	--	--	--	--	--	--	--	1.21309	0.00788329	1.4306	0.516625	up
208	6-Aminocaproic acid	Organic acids	7.07032e+06	6.76001e+06	6.15097e+06	5.94079e+06	5.44662e+06	5.64546e+06	5.65246e+06	5.87099e+06	5.50922e+06	4.76642e+06	4.138e+06	4.56799e+06	4.71727e+06	4.56882e+06	5.07803e+06	ko01100	--	--	--	--	--	1.47459	0.00990364	0.790975	-0.338296	down	--	--	--	--	--	--	--	--	--	--
209	2-Propylglutaric acid	Organic acids	36971	18197.3	26221.7	92101.2	128578	96924.9	54996.6	55962.6	97505	53628.9	95348.5	48705.1	54482.1	70375	45431.4	-	--	--	--	--	--	--	--	--	--	--	--	--	--	--	--	1.23109	0.00964568	3.90225	1.96431	up
210	Citraconic acid	Organic acids	155633	226863	267059	423657	490619	474083	496317	418746	488538	529233	536578	545320	511056	503895	258393	ko00290,ko00660,ko01100,ko01210	--	--	--	--	--	--	--	--	--	--	--	--	--	--	--	1.1936	0.00549536	2.1374	1.09586	up
211	Thymidine	Nucleotides and derivatives	543339	556924	546536	1.1308e+06	1.11079e+06	1.17817e+06	943805	1.00102e+06	1.05409e+06	985057	1.03993e+06	1.03515e+06	865718	928545	953052	ko00240,ko01100,ko01232	--	--	--	--	--	--	--	--	--	--	--	--	--	--	--	1.29526	0.000756195	2.07661	1.05423	up
212	Isocytosine	Nucleotides and derivatives	3.47383e+06	3.43858e+06	3.34649e+06	1.45928e+06	1.54351e+06	1.67242e+06	1.62074e+06	1.80231e+06	1.41257e+06	1.00051e+06	913308	883196	957357	988253	1.16837e+06	-	--	--	--	--	--	--	--	--	--	--	--	--	--	--	--	1.29037	6.30772e-05	0.455722	-1.13378	down
213	2'-Deoxyadenosine	Nucleotides and derivatives	188347	154440	164845	409670	337138	371992	378553	330864	283698	404983	395421	461389	451477	415542	362223	ko00230,ko01100,ko01232,ko02010	--	--	--	--	--	--	--	--	--	--	--	--	--	--	--	1.27083	0.00369083	2.20396	1.1401	up
214	Guanosine	Nucleotides and derivatives	1.00565e+07	1.10592e+07	1.1572e+07	1.68743e+07	1.663e+07	1.57333e+07	1.40363e+07	1.50746e+07	3.75331e+06	4.82688e+06	6.03623e+06	9.49945e+06	9.49436e+06	9.62467e+06	1.04359e+07	ko00230,ko01100,ko01232,ko02010	--	--	--	--	--	--	--	--	--	--	--	--	--	--	--	1.26529	0.00081258	1.5063	0.591007	up
215	Vidarabine	Nucleotides and derivatives	8.66908e+06	8.50655e+06	8.39183e+06	5.28104e+07	5.02697e+07	4.51466e+07	5.04292e+07	5.20949e+07	5.47341e+07	6.67083e+07	6.86593e+07	6.36125e+07	6.28002e+07	5.91918e+07	5.73632e+07	-	--	--	--	--	--	1.52348	0.00216384	1.26531	0.339489	up	--	--	--	--	--	1.29536	0.00299418	5.79747	2.53542	up
216	NADP (Nicotinamide adenine dinucleotide phosphate)	Nucleotides and derivatives	1.18202e+06	1.02586e+06	1.30212e+06	448272	532439	471296	567216	445421	419327	437550	387042	484748	415425	425256	398282	ko00195,ko00480,ko00760,ko01100,ko01240	--	--	--	--	--	--	--	--	--	--	--	--	--	--	--	1.27358	0.00839903	0.413678	-1.27342	down
217	Adenosine	Nucleotides and derivatives	8.73555e+06	8.64139e+06	8.58701e+06	5.20824e+07	4.94719e+07	5.03821e+07	4.67285e+07	5.41827e+07	5.60703e+07	6.47189e+07	6.622e+07	7.16121e+07	6.48707e+07	6.14815e+07	5.2184e+07	ko00230,ko01100,ko01232,ko02010	--	--	--	--	--	--	--	--	--	--	--	--	--	--	--	1.2969	0.000318777	5.85182	2.54889	up
218	Guanosine 3',5'-cyclic monophosphate	Nucleotides and derivatives	41414.7	45278.5	40620.4	1.83288e+06	1.68918e+06	1.77148e+06	1.70392e+06	1.59573e+06	1.96513e+06	1.93619e+06	1.92808e+06	1.79655e+06	1.83035e+06	1.86591e+06	2.06185e+06	ko00230,ko01100	--	--	--	--	--	--	--	--	--	--	--	--	--	--	--	1.29681	0.000575991	41.5787	5.37777	up
219	2'-O-Methyladenosine	Nucleotides and derivatives	1.00012e+06	1.24311e+06	1.034e+06	1.5815e+06	1.68618e+06	1.71473e+06	1.55392e+06	1.58191e+06	1.73897e+06	1.38776e+06	1.24195e+06	1.29443e+06	1.20605e+06	1.13475e+06	1.1329e+06	-	--	--	--	--	--	--	--	--	--	--	--	--	--	--	--	1.22804	0.00671125	1.52031	0.604367	up
220	2'-Deoxyinosine-5'-monophosphate	Nucleotides and derivatives	4.31938e+06	4.16645e+06	4.00257e+06	2.08623e+06	2.35218e+06	2.01383e+06	2.48752e+06	2.15633e+06	2.41748e+06	2.43873e+06	2.63377e+06	2.71963e+06	3.4805e+06	2.81971e+06	3.11514e+06	ko00230,ko01232	--	--	--	--	--	--	--	--	--	--	--	--	--	--	--	1.28141	0.000139046	0.516658	-0.952717	down
221	5'-Deoxy-5'-(methylthio)adenosine	Nucleotides and derivatives	903763	861760	933442	1.64644e+06	1.80098e+06	1.53103e+06	1.37706e+06	1.2339e+06	1.63369e+06	1.49048e+06	1.34085e+06	1.47635e+06	1.81511e+06	1.6715e+06	1.60599e+06	ko00270,ko00908,ko01100	--	--	--	--	--	--	--	--	--	--	--	--	--	--	--	1.27828	0.00718353	1.84458	0.883291	up
222	Choline	Alkaloids	9.43675e+07	8.85371e+07	9.3929e+07	5.45967e+07	5.15559e+07	5.08821e+07	4.23012e+07	5.19002e+07	5.09631e+07	5.25235e+07	5.5224e+07	5.37876e+07	5.44507e+07	4.78914e+07	5.4375e+07	ko00260,ko00564,ko01100,ko02010	--	--	--	--	--	--	--	--	--	--	--	--	--	--	--	1.28977	0.000198534	0.567253	-0.817935	down
223	Theobromine	Alkaloids	5.17637e+07	5.14742e+07	4.89492e+07	6.58427e+07	6.18638e+07	6.33749e+07	5.81271e+07	6.01223e+07	6.67653e+07	5.874e+07	6.13989e+07	6.68059e+07	6.48774e+07	6.34893e+07	6.50983e+07	ko00232,ko01100,ko01110	--	--	--	--	--	--	--	--	--	--	--	--	--	--	--	1.26665	0.00119087	1.25557	0.328342	up
224	4,5,6-Trihydroxy-2-cyclohexen-1-ylideneacetonitrile	Alkaloids	824366	901780	871602	1.3028e+06	1.22443e+06	1.34278e+06	1.0114e+06	1.12077e+06	1.07506e+06	1.04885e+06	1.23243e+06	1.14982e+06	1.26778e+06	1.31258e+06	1.29144e+06	-	1.54211	0.00953222	0.82874	-0.271009	down	--	--	--	--	--	--	--	--	--	--	1.2746	0.00109023	1.48976	0.575076	up
225	N-Benzylmethylene isomethylamine	Alkaloids	1.5692e+07	1.69148e+07	1.58778e+07	2.46257e+07	2.38976e+07	2.59153e+07	1.98623e+07	2.18771e+07	2.05575e+07	2.10732e+07	2.24046e+07	2.30196e+07	2.41979e+07	2.4893e+07	2.48695e+07	-	--	--	--	--	--	--	--	--	--	--	--	--	--	--	--	1.28183	0.000594443	1.5353	0.618524	up
226	p-Coumaroylagmatine	Alkaloids	885996	913066	910925	716900	745323	730444	916736	966773	906020	842492	899172	966734	935925	866457	859187	ko00330,ko01100	1.64624	0.00332578	1.27221	0.347335	up	--	--	--	--	--	--	--	--	--	--	1.2848	0.000136967	0.809106	-0.305599	down
227	1-Methoxy-indole-3-acetamide	Alkaloids	2.78417e+06	2.89288e+06	2.79467e+06	3.0159e+06	2.96575e+06	3.3589e+06	3.05058e+06	3.06705e+06	2.87016e+06	2.45866e+06	2.36668e+06	2.4482e+06	2.60656e+06	2.34515e+06	2.48089e+06	-	--	--	--	--	--	1.54054	0.0047476	0.809268	-0.30531	down	--	--	--	--	--	--	--	--	--	--
228	N-Feruloylagmatine	Alkaloids	9.95409e+06	1.08508e+07	1.03793e+07	1.39235e+07	1.36797e+07	1.39228e+07	1.22063e+07	1.41752e+07	1.35642e+07	11705313	1.0738e+07	1.35488e+07	1.24447e+07	1.3781e+07	1.13721e+07	ko00330,ko01100	--	--	--	--	--	--	--	--	--	--	--	--	--	--	--	1.27723	0.00300082	1.33163	0.413195	up
229	N-Acetyl-5-hydroxytryptamine	Alkaloids	614391	537556	528693	383650	416592	316783	364543	203699	361671	360357	344666	258213	83703.6	330955	315690	ko00380,ko01100,ko01110	--	--	--	--	--	--	--	--	--	--	--	--	--	--	--	1.17971	0.0094872	0.664642	-0.58935	down
230	N-Feruloylputrescine	Alkaloids	596394	546782	578733	572561	618530	642044	542835	547327	476949	282580	250283	253336	263047	264265	300422	ko00330,ko01100	--	--	--	--	--	1.55861	0.00258467	0.501687	-0.99514	down	--	--	--	--	--	--	--	--	--	--
231	Pantetheine	Alkaloids	31754.2	31568.4	28834.3	37388.3	61485.7	80328.4	50801.6	43763.1	48062.9	46869.3	42328.4	39579	17036.5	19755	15773.8	ko00332,ko00770,ko01100,ko01110	--	--	--	--	--	--	--	--	--	--	1.69216	0.00157349	0.408189	-1.29269	down	--	--	--	--	--
232	Caffeoylagmatine	Alkaloids	179872	181548	151776	85935.3	95134.3	67130.8	108747	128959	128295	77637.8	81751.7	98599.6	81829.2	89964.6	109438	-	--	--	--	--	--	--	--	--	--	--	--	--	--	--	--	1.23324	0.00245341	0.483637	-1.048	down
233	N-benzylformamide	Alkaloids	1.04907e+06	1.28761e+06	1.15633e+06	721400	776099	644793	725306	667514	655938	648753	867106	677031	773436	808974	690769	-	--	--	--	--	--	--	--	--	--	--	--	--	--	--	--	1.23185	0.0095853	0.613309	-0.705314	down
234	3-Indoleacetonitrile	Alkaloids	96752	109382	146880	184553	202298	208690	286825	306073	307022	300618	316881	310367	341660	320994	326253	ko00380,ko01100	1.64081	0.00050703	1.5111	0.595596	up	--	--	--	--	--	--	--	--	--	--	--	--	--	--	--
235	Glucose-1-phosphate*	Saccharides	5.5385e+06	5.64583e+06	6.03175e+06	4.7149e+06	4.19224e+06	4.86884e+06	4.05817e+06	3.68708e+06	4.07088e+06	2.99797e+06	3.02736e+06	2.81247e+06	2.50632e+06	2.92698e+06	2.49552e+06	ko00010,ko00040,ko00052,ko00500,ko00520,ko00523,ko00561,ko01100,ko01110,ko01240,ko01250	--	--	--	--	--	1.52379	0.00573616	0.747943	-0.418999	down	--	--	--	--	--	--	--	--	--	--
236	D-Threonic Acid	Saccharides	1.6872e+06	1.60101e+06	1.60635e+06	2.1178e+06	2.28208e+06	2.33334e+06	2.46747e+06	2.39355e+06	2.51115e+06	2.19227e+06	2.2381e+06	2.36818e+06	2.21682e+06	2.29781e+06	2.39766e+06	-	--	--	--	--	--	--	--	--	--	--	--	--	--	--	--	1.26785	0.00472213	1.37565	0.460117	up
237	3-Phospho-D-glyceric acid	Saccharides	2.26696e+06	2.41232e+06	2.58195e+06	1.70513e+06	1.667e+06	1.49238e+06	1.6878e+06	1.48792e+06	1.72309e+06	1.26858e+06	1.10917e+06	1.35854e+06	1.13652e+06	1.12366e+06	1.21031e+06	ko00010,ko00030,ko00260,ko00270,ko00561,ko00630,ko00710,ko01100,ko01110,ko01200,ko01230,ko01240	--	--	--	--	--	--	--	--	--	--	--	--	--	--	--	1.24912	0.00293013	0.66993	-0.577917	down
238	D-Xylonic acid	Saccharides	4.81062e+06	4.53598e+06	5.14305e+06	5.12427e+06	5.03109e+06	5.05957e+06	4.87047e+06	5.14359e+06	5.25381e+06	6.78728e+06	6.80998e+06	6.76911e+06	7.37641e+06	7.05112e+06	7.00042e+06	ko00040,ko01100	--	--	--	--	--	1.56163	0.00413251	1.33394	0.41569	up	--	--	--	--	--	--	--	--	--	--
239	D-Fructose 6-Phosphate*	Saccharides	4.17395e+06	4.05334e+06	4.14852e+06	3.23036e+06	3.01774e+06	3.09734e+06	3.01453e+06	2.48585e+06	3.05584e+06	2.04132e+06	2.20618e+06	2.29653e+06	1.9424e+06	1.8425e+06	1.99543e+06	ko00052,ko00500,ko00710,ko01100,ko01110,ko01200	--	--	--	--	--	--	--	--	--	--	--	--	--	--	--	1.28144	0.000513348	0.755137	-0.40519	down
240	Ribulose-5-phosphate	Saccharides	245927	360974	292759	184645	179388	169352	151334	147323	159740	93051.7	102817	80979.6	103675	103514	86786.2	ko00030,ko00230,ko00440,ko00710,ko00750,ko01100,ko01110,ko01200,ko01230,ko01240	--	--	--	--	--	1.51905	0.00285515	0.603949	-0.727503	down	--	--	--	--	--	--	--	--	--	--
241	D-Glucose 6-phosphate*	Saccharides	6.12402e+06	6.1984e+06	6.1031e+06	4.60322e+06	4.90128e+06	4.71177e+06	4.54738e+06	4.02323e+06	4.99792e+06	3.37219e+06	3.21863e+06	3.30487e+06	2.83597e+06	2.73487e+06	2.86003e+06	ko00500,ko00524,ko00562,ko01100,ko01110	--	--	--	--	--	--	--	--	--	--	--	--	--	--	--	1.2838	0.00176572	0.771553	-0.374162	down
242	Dihydroxyacetone phosphate	Saccharides	120483	123024	144542	137470	124904	139584	123931	128639	109046	150341	161054	163956	151613	151343	157482	ko00010,ko00040,ko00051,ko00052,ko00561,ko00562,ko00564,ko00640,ko00710,ko00760,ko01100,ko01110,ko01200,ko01230	--	--	--	--	--	1.46189	0.00845571	1.31452	0.394534	up	--	--	--	--	--	--	--	--	--	--
243	Sorbitol-6-phosphate	Saccharides	32800.7	33211.2	40346	34974.2	31423.1	35567.3	32410.5	27269.6	29203.4	18070	13833.4	15707	26106.4	22405.7	16049	ko00051,ko01100	--	--	--	--	--	1.51697	0.00239697	0.535649	-0.900639	down	--	--	--	--	--	--	--	--	--	--
244	D-Pantothenic Acid	Vitamin	950744	1.0645e+06	1.0089e+06	1.56243e+06	1.50983e+06	1.61775e+06	1.45726e+06	1.39147e+06	1.45115e+06	1.40071e+06	1.47576e+06	1.39959e+06	1.42042e+06	1.49791e+06	1.56389e+06	ko00410,ko00770,ko01100,ko01110,ko01240	--	--	--	--	--	--	--	--	--	--	--	--	--	--	--	1.27799	0.000257744	1.55085	0.633064	up
245	Dehydroascorbic acid	Vitamin	93923.8	22426.8	95182.3	304158	328203	273382	265227	185611	258092	462347	422843	476239	465788	393816	315805	ko00053,ko00480,ko01100	--	--	--	--	--	1.48743	0.00364727	1.9204	0.941407	up	--	--	--	--	--	1.11641	0.0023396	4.28181	2.09822	up
246	Nicotinamide	Vitamin	923749	1.03262e+06	1.02519e+06	2.16813e+06	2.30702e+06	2.06613e+06	2.0659e+06	2.27455e+06	2.22441e+06	2.52411e+06	2.1005e+06	2.46133e+06	4.26972e+06	3.8695e+06	4.56423e+06	ko00760,ko01100,ko01240	--	--	--	--	--	--	--	--	--	--	1.66585	0.00264005	1.79277	0.84219	up	1.28753	0.000678038	2.19391	1.13351	up
247	Orotic acid (Vitamin B13)	Vitamin	671351	541506	697001	911158	992403	924174	1.04323e+06	949659	931223	1.81627e+06	1.61752e+06	1.89947e+06	1.57644e+06	1.44913e+06	1.5516e+06	ko00240,ko01100,ko01240	--	--	--	--	--	1.55095	0.00471562	1.82389	0.867022	up	--	--	--	--	--	--	--	--	--	--
248	Nicotinic acid (Vitamin B3)	Vitamin	193279	200724	183378	200749	170803	203908	208914	195055	183919	248886	247364	264109	248842	215814	241009	ko00760,ko00960,ko01100,ko01110,ko01240	--	--	--	--	--	1.50247	0.00404996	1.29337	0.371139	up	--	--	--	--	--	--	--	--	--	--
249	3,3',4-O-Trimethylellagic acid	Tannins	117588	119730	121307	111208	101270	105855	79781.3	96737.1	88458.9	49886.6	47644.4	53978.8	48102.2	51316.2	54076.5	-	--	--	--	--	--	1.53814	0.00908064	0.571784	-0.806458	down	--	--	--	--	--	--	--	--	--	--
250	Theaflavin-3'-Gallate*	Tannins	178239	170683	188396	126861	115952	139012	134349	155496	181565	102873	115541	100380	138719	151965	137074	-	--	--	--	--	--	--	--	--	--	--	1.61308	0.00546897	1.3418	0.424175	up	1.22585	0.0043135	0.710611	-0.492867	down
251	Theaflavin-3,3'-di-O-gallate	Tannins	125486	91409.2	70604.8	112443	125128	107320	169608	147492	152799	107252	67119.5	110088	118170	145200	117530	-	1.55812	0.00916128	1.36246	0.446212	up	--	--	--	--	--	--	--	--	--	--	--	--	--	--	--
252	Esculin (6,7-Dihydroxycoumarin-6-O-glucoside)*	Coumarins	176249	143054	190345	258106	302041	269430	280818	277193	296958	239980	183950	242071	252392	233011	299288	-	--	--	--	--	--	--	--	--	--	--	--	--	--	--	--	1.2049	0.00523452	1.62775	0.702876	up
253	7-Methoxycoumarin	Coumarins	567946	649573	592790	1.03495e+06	1.08661e+06	1.01103e+06	657876	779252	746867	396063	420201	429672	437184	424826	422377	-	1.60481	0.0035343	0.697185	-0.520386	down	1.55	0.00916947	0.570485	-0.80974	down	--	--	--	--	--	1.2803	0.000186151	1.73042	0.79112	up
254	Syringaresinol	Lignans	22110.5	21168.8	25269.7	37716.2	36325	32135.2	40482.5	35991.9	41132.9	34282.9	40954.9	39673.4	33262.7	23223.2	30132.1	-	--	--	--	--	--	--	--	--	--	--	--	--	--	--	--	1.23253	0.00499683	1.54891	0.631255	up
255	Epipinoresinol*	Lignans	96710.7	114809	108817	168646	157932	152677	141463	152428	166607	164988	160765	161732	134990	185454	176678	-	--	--	--	--	--	--	--	--	--	--	--	--	--	--	--	1.24686	0.00183176	1.49609	0.581199	up
256	1,2,3,19-Tetrahydroxyurs-12-en-28-oic acid	Terpenoids	10564.6	8940.15	17707.8	4142.22	1724.39	4846.62	14006.8	13229.6	13062.3	3866.5	1825.42	5944.78	5447.48	4826.47	3542.57	-	1.52509	0.00542103	3.76159	1.91134	up	--	--	--	--	--	--	--	--	--	--	--	--	--	--	--
Note: The P-Value was calculated by T-test. "*" indicates the presence of isomers of the substance.
