# Supplementary figures and images for: Dynamic Changes in Non-Volatile Components during Steamed Green Tea Manufacturing Based on Widely Targeted Metabolomic Analysis
Source: MDPI journal article supplement (doi:10.3390/foods12071551), 2023-04-06

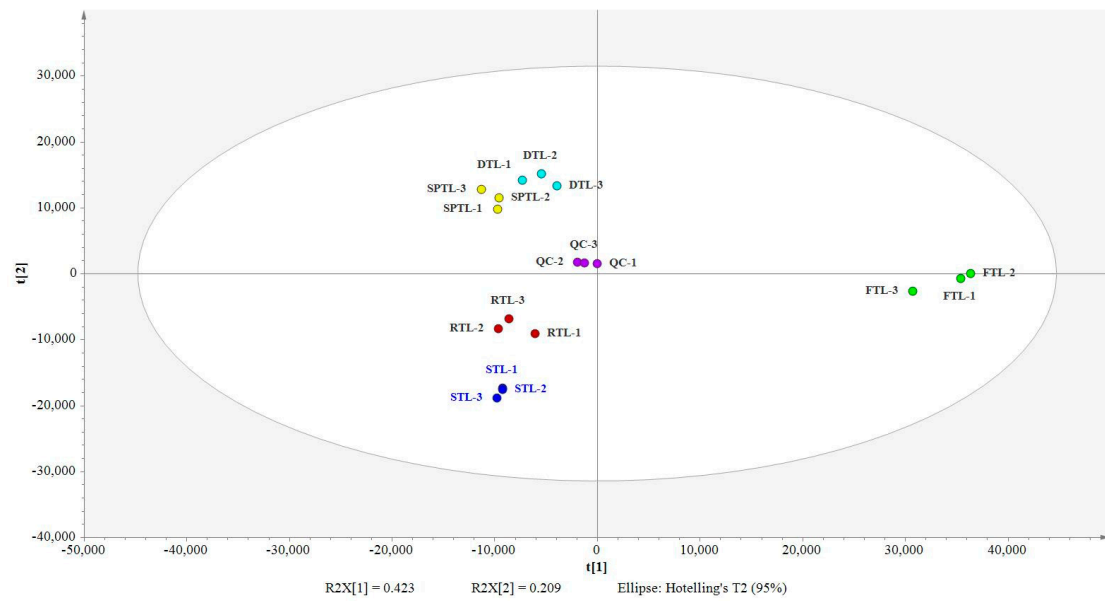

Figure S1: The score plot of principal component analysis of tea and QC samples

Supplement: s1 [file s1]
